# Supplementary material for: CMS121: a novel approach to mitigate aging-related obesity and metabolic dysfunction
Source: publisher site journal article supplement (doi:10.18632/aging.205673), 2024-03-20
Supplement: Supplementary file [file aging-v16i6-205673-supplementary-material-SD1.pdf]

## SUPPLEMENTARY FIGURE

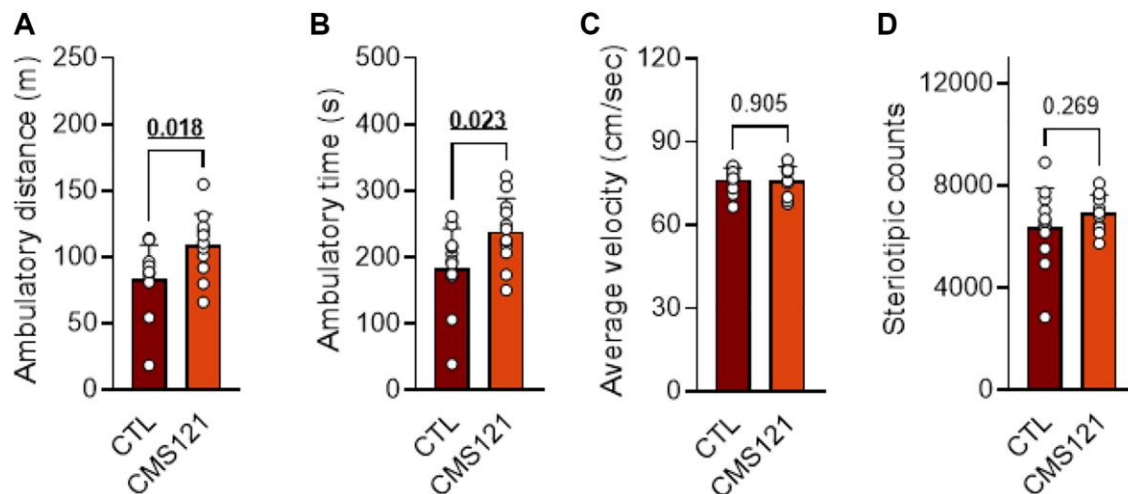

**Supplementary Figure 1. Locomotor activity in animals freely exploring an open field two weeks after treatment began.** Animals were exposed to the open field for 5 min and their activity recorded and analyzed with the Anymaze software. (A) Total distance traveled; (B) ambulatory time, (C) average velocity, and (D) stereotypic movements. Data are presented as mean + SD ( $n = 12$ ). Bold underlined  $p$ -values indicate statistical significance.
