# Supplementary material for: CMS121: a novel approach to mitigate aging-related obesity and metabolic dysfunction
Source: Aging (Albany NY). 2024 Mar 20;16(6):4980–99. doi: 10.18632/aging.205673 (PMC11006478; doi:10.18632/aging.205673)
Supplement: Supplementary Table 1 [file aging-16-205673-s002.xlsx]

## Sheet: OrigScale
Supplementary Table 1. Plasma metabolomic raw data.
												SAMPLE NAME	SALK-00500	SALK-00501	SALK-00502	SALK-00503	SALK-00504	SALK-00505	SALK-00506	SALK-00507	SALK-00508	SALK-00509
												CLIENT IDENTIFIER	5P	7P	21P	22P	2P	14P	18P	19P	26P	47P
												PARENT SAMPLE ID	4243052	4243053	4243054	4243055	4243056	4243057	4243058	4243059	4243060	4243061
												CLIENT PATIENT ID	.	.	.	.	.	.	.	.	.	.
												ANIMAL ID	5	7	21	22	2	14	18	19	26	47
												DISEASE	WT	WT	WT	WT	WT	WT	WT	WT	WT	WT
												GENDER	m	m	m	m	m	m	m	m	m	m
												GROUP NUMBER	9	9	9	9	9	10	10	10	10	10
												SAMPLE NUMBER	43	44	45	46	47	48	49	50	51	52
												TREATMENT	CMS121	CMS121	CMS121	CMS121	CMS121	Ctrl	Ctrl	Ctrl	Ctrl	Ctrl
PATHWAY SORTORDER	BIOCHEMICAL	SUPER PATHWAY	SUB PATHWAY	COMP ID	PLATFORM	CHEMICAL ID	RI	MASS	CAS	PUBCHEM	KEGG	Group HMDB	WT CMS	WT CMS	WT CMS	WT CMS	WT CMS	WT CON	WT CON	WT CON	WT CON	WT CON
412	(N(1) + N(8))-acetylspermidine	Amino Acid	Polyamine Metabolism	57814	LC/MS Pos Early	100016038	3080	188.176					454092	882016	1529023	1543468	665368	1106454	686680	1649420	2116375	1300664
2223	1-(1-enyl-oleoyl)-GPE (P-18:1)*	Lipid	Lysoplasmalogen	44621	LC/MS Pos Late	100005372	1566	464.314					327464	359658	175699	200734	244767	361418	317639	273825	203861	323231
2202	1-(1-enyl-palmitoyl)-2-arachidonoyl-GPC (P-16:0/20:4)*	Lipid	Plasmalogen	52689	LC/MS Pos Late	100009014	2154	766.575				HMDB11220	3684816	3315428	3685270	3206968	5820123	3665987	5347077	4384659	3975189	3934481
2194	1-(1-enyl-palmitoyl)-2-arachidonoyl-GPE (P-16:0/20:4)*	Lipid	Plasmalogen	52673	LC/MS Pos Late	100009002	2270	724.528				HMDB11352	7.83848e+06	10354471	7.7403e+06	10476399	9555839	8463519	9671661	8714675	12524681	7609178
2203	1-(1-enyl-palmitoyl)-2-linoleoyl-GPC (P-16:0/18:2)*	Lipid	Plasmalogen	52682	LC/MS Pos Late	100009009	2226	742.575				HMDB11211	5404820	5449116	3106307	4290593	6.90818e+06	4443550	6238661	4112179	7425466	4712027
2191	1-(1-enyl-palmitoyl)-2-linoleoyl-GPE (P-16:0/18:2)*	Lipid	Plasmalogen	52677	LC/MS Pos Late	100009069	2351	700.528				HMDB11343	509922	779649	258417	661169	581100	501097	813620	439146	814761	417396
2196	1-(1-enyl-palmitoyl)-2-oleoyl-GPC (P-16:0/18:1)*	Lipid	Plasmalogen	52478	LC/MS Pos Late	100009007	2443	744.59					1922287	1893693	2020284	2154397	2071394	2012056	2075845	1970915	2265563	2130710
2190	1-(1-enyl-palmitoyl)-2-oleoyl-GPE (P-16:0/18:1)*	Lipid	Plasmalogen	52477	LC/MS Pos Late	100009005	2600	702.543				HMDB11342		1987860	959092	1465033	879513	1615101	1683912	1368360	2308654
2192	1-(1-enyl-palmitoyl)-2-palmitoyl-GPC (P-16:0/16:0)*	Lipid	Plasmalogen	52716	LC/MS Pos Late	100009162	2454	718.575		11146967		HMDB11206	1956705	1422647	1910448	1958591	2208228	2373504	2104103	1909702	2099009	2161935
2220	1-(1-enyl-palmitoyl)-GPC (P-16:0)*	Lipid	Lysoplasmalogen	52474	LC/MS Pos Late	100002875	1547	480.345		10917802		HMDB10407	2357782	2890041	1.72013e+06	2301038	2.79064e+06	2288435	2613606	2222038	2663928	2722141
2221	1-(1-enyl-palmitoyl)-GPE (P-16:0)*	Lipid	Lysoplasmalogen	39270	LC/MS Pos Late	100003000	1558	438.298					1037733	1100558	626291	627454	920682	1182154	1068441	934707	795340	1168966
2206	1-(1-enyl-stearoyl)-2-arachidonoyl-GPE (P-18:0/20:4)*	Lipid	Plasmalogen	52475	LC/MS Pos Late	100008999	2511	752.559		9547058		HMDB05779	20416172	30172596	24231788	25177156	29762666	26109626	29888186	27834704	28883532	24276424
2199	1-(1-enyl-stearoyl)-2-linoleoyl-GPE (P-18:0/18:2)*	Lipid	Plasmalogen	52748	LC/MS Pos Late	100009225	2633	728.559				HMDB11376	6440411	4846388	5242759	4128562	7349940	7123182	7963488	6483298	7.48255e+06	6092727
2198	1-(1-enyl-stearoyl)-2-oleoyl-GPE (P-18:0/18:1)	Lipid	Plasmalogen	52614	LC/MS Pos Late	100008919	2950	730.575	144371-68-6			HMDB11375	1367595	2565407	1264918	2032378	1.98841e+06	2044064	2403379	1657466	2411784	889223
2225	1-(1-enyl-stearoyl)-GPE (P-18:0)*	Lipid	Lysoplasmalogen	39271	LC/MS Pos Late	100003001	1649	466.329					919548	1112564	644391	578054	1146218	1222983	1056080	866811	852734	1154844
4699	1,2,3-benzenetriol sulfate (2)	Xenobiotics	Chemical	48762	LC/MS Neg	100006374	1709	204.981					57393	320813	342840	560138		55507	82803	35426	1151586	156089
1805	1,2-dilinoleoyl-GPC (18:2/18:2)	Lipid	Phosphatidylcholine (PC)	52603	LC/MS Pos Late	100008903	2006	782.569	998-06-1	5288075		HMDB08138	280251936	306640032	228345600	264016112	261236544	244147840	238412416	197646816	290510624	233519856
1791	1,2-dioleoyl-GPC (18:1/18:1)	Lipid	Phosphatidylcholine (PC)	52457	LC/MS Pos Late	100008905	2346	786.601	4235-95-4	10350317			102363368	105956376	59540500	79647344	70331280	79125576	91712584	82165144	91405584	85165232
1731	1,2-dipalmitoyl-GPC (16:0/16:0)	Lipid	Phosphatidylcholine (PC)	19130	LC/MS Pos Late	100000657	2365	734.569	63-89-8	452110		HMDB00564	55199940	62513912	55279416	56110236	50558592	44592336	54340200	52028776	52389916	47878440
905	1,5-anhydroglucitol (1,5-AG)	Carbohydrate	Glycolysis, Gluconeogenesis, and Pyruvate Metabolism	20675	LC/MS Neg	100000580	802	163.061	154-58-5	64960	C07326	HMDB02712	32766770	29635712	35130400	26599410	39189916	33949596	46342264	39233824	32185668	34072368
1163	10-heptadecenoate (17:1n7)	Lipid	Long Chain Fatty Acid	33971	LC/MS Neg	100001278	5555	267.233	29743-97-3	5312435		HMDB60038	11263935	12985431	9174266	12698496	29337396	18328160	10008113	11930759	16810822	13629200
1175	10-nonadecenoate (19:1n9)	Lipid	Long Chain Fatty Acid	33972	LC/MS Neg	100001277	5780	295.264	73033-09-7	5312513		HMDB13622	5940141	5806478	3899962	4226560	12162587	5425261	3819302	3686729	5172370	5457519
1150	10-undecenoate (11:1n1)	Lipid	Medium Chain Fatty Acid	32497	LC/MS Neg	100001197	5085.8	183.139	1333-28-4	14891	C13910	HMDB33724	351002	116222		344135	479037	174280	216366		229870	421066
1533	12,13-DiHOME	Lipid	Fatty Acid, Dihydroxy	38395	LC/MS Neg	62	5137	313.238	263399-35-5	10236635	C14829	HMDB04705	445215	313206	259168	520538	553848	407714	507728	210538	232173	305498
2732	12-dehydrocholate	Lipid	Secondary Bile Acid Metabolism	44644	LC/MS Neg	100001072	4871	405.265	2458-08-4;2458-08-4	94235		HMDB00400	1705165	72039.5	29622	105640	32347	372931	65398	62064	118957	173066
1613	12-HETE	Lipid	Eicosanoid	37536	LC/MS Neg	100002167	5326	319.228	71030-37-0;73837-14-6	5312983		HMDB06111	1611707	777829	456909	594026	1748555	379367	712834	468252	508511	335468
1509	13-HODE + 9-HODE	Lipid	Fatty Acid, Monohydroxy	37752	LC/MS Neg	100002196	5275	295.228		43013			1507836	1352057	1268652	1956149	2862538	2311141	1.92772e+06	1173287	686008	1193723
1268	13-methylmyristate (i15:0)	Lipid	Fatty Acid, Branched	38293	LC/MS Neg	100002344	5499	241.217	2485-71-4	151014			2.39132e+06	1.92675e+06	2156188	2241398	3719170	4100837	2.37055e+06	1.811e+06	2594871	4303608
1271	15-methylpalmitate (i17:0)	Lipid	Fatty Acid, Branched	38768	LC/MS Neg	100002945	5695	269.249		17903417			11122543	9348792	7713447	7990122	17962844	13397865	8872521	9705781	10297744	12083798
1505	16-hydroxypalmitate	Lipid	Fatty Acid, Monohydroxy	39609	LC/MS Neg	100002953	5236.2	271.228	506-13-8	10466	C18218	HMDB06294	1266025	1229838	1429748	1447609	1.55414e+06	1422799	1380709	1271013	1.53937e+06	1054510
1274	17-methylstearate (i19:0)	Lipid	Fatty Acid, Branched	38296	LC/MS Neg	100002356	5993	297.28	2724-59-6	3083779		HMDB37397	3582669	3258576	1814519	1.73953e+06	6892804	3.3814e+06	2976875	2777891	2761421	3761164
1998	1-arachidonoyl-GPA (20:4)	Lipid	Lysophospholipid	46325	LC/MS Neg	100004442	5499	457.236	799268-65-8				260020	295747	267271		283989	191819	389824	331008		401392
2035	1-arachidonoyl-GPC (20:4n6)*	Lipid	Lysophospholipid	33228	LC/MS Pos Late	100001551	1460	544.34			C05208	HMDB10395	276498720	331713216	242321184	235358800	348162592	243934480	244414656	278311168	302286976	295841152
2075	1-arachidonoyl-GPE (20:4n6)*	Lipid	Lysophospholipid	35186	LC/MS Pos Late	100001571	1470	502.293		42607465		HMDB11517	15759099	28426914	14405394	16206126	30713172	22326704	19890136	16145295	21497562	20193952
2109	1-arachidonoyl-GPI (20:4)*	Lipid	Lysophospholipid	34214	LC/MS Neg	100001654	5482	619.289				HMDB61690	28612828	27680558	19363800	11242139	25023926	13577435	19295580	16515634	11679131	26817900
2248	1-arachidonylglycerol (20:4)	Lipid	Monoacylglycerol	34397	LC/MS Neg	100001433	6250	303.233	35474-99-8	5282281	C13857	HMDB11549	1724558	1105880		779801	1093613	1294445	971453	1239905	1394236	1.39257e+06
2247	1-dihomo-linolenylglycerol (20:3)	Lipid	Monoacylglycerol	48341	LC/MS Neg	100006121	6400	305.249					499968	233503	219366	303956	389309	523087	321379	480367	682092	643898
1359	1-dihomo-linoleoylglycerol (20:2)	Lipid	Fatty Acid, Keto	35103	LC/MS Neg	100001483	6800	307.264					143979	387339		108767	86887	138282	59738	63122	89267	104564
2251	1-docosahexaenoylglycerol (22:6)	Lipid	Monoacylglycerol	35153	LC/MS Neg	100001481	6150	309.222				HMDB11587	582518	266405	238258	208960	370170	432765	400995	611098	517040	646125
2046	1-lignoceroyl-GPC (24:0)	Lipid	Lysophospholipid	49617	LC/MS Pos Late	100002873	1907	608.465	325171-59-3			HMDB10405	6535328	12091955	8966978	10203052	9615777	7676724	8056765	7622796	12639745	10323926
2244	1-linolenoylglycerol (18:3)	Lipid	Monoacylglycerol	34393	LC/MS Neg	100001435	6214	277.217	124151-74-2	53480978		HMDB11569		328806	333657	713373	573980	716387	703730	635059	590930	420848
2020	1-linolenoyl-GPC (18:3)*	Lipid	Lysophospholipid	45951	LC/MS Pos Late	100005350	1410	518.324				HMDB10388	14071561	19414184	8738838	9422467	12825727	8460633	9829339	6427769	18994506	12186583
1809	1-linoleoyl-2-arachidonoyl-GPC (18:2/20:4n6)*	Lipid	Phosphatidylcholine (PC)	52710	LC/MS Pos Late	100009131	1969	806.569				HMDB08147	163843520	195395552	178398608	202329136	223088672	165951552	179089376	192389504	231169440	199722096
1806	1-linoleoyl-2-linolenoyl-GPC (18:2/18:3)*	Lipid	Phosphatidylcholine (PC)	53176	LC/MS Pos Late	100009343	1939	780.554				HMDB08141	14895315	19374908	15078780	16480964	19788880	18707098	16790304	11669163	19386628	15118981
2243	1-linoleoylglycerol (18:2)	Lipid	Monoacylglycerol	27447	LC/MS Neg	100001040	6477	279.233	2277-28-3	5283469			17864158	19576840	19165002	29957540	36652256	33727408	25836892	30585572	26860332	30145192
1996	1-linoleoyl-GPA (18:2)*	Lipid	Lysophospholipid	52690	LC/MS Neg	100009082	5483	433.236				HMDB07856	996053	889506	715282	209198	531101	345472	1382906	777681	278760	1222107
2018	1-linoleoyl-GPC (18:2)	Lipid	Lysophospholipid	34419	LC/MS Pos Late	100001395	1465	520.34		11988421	C04100	HMDB10386	913243328	1026334400	696229440	712709376	876676992	748568768	687987008	633255104	897708992	774790720
2064	1-linoleoyl-GPE (18:2)*	Lipid	Lysophospholipid	36600	LC/MS Pos Late	100001570	1482	478.293		52925130		HMDB11507	24574852	24617412	11112666	12263265	27272460	21861516	15330505	11134901	16361156	15027132
2097	1-linoleoyl-GPG (18:2)*	Lipid	Lysophospholipid	54885	LC/MS Neg	100009227	5516	507.273					1474028	1239921	1108169	1362900	1948293	1064423	869936	706575	1353567	931275
2105	1-linoleoyl-GPI (18:2)*	Lipid	Lysophospholipid	36594	LC/MS Neg	100001778	5494	595.289					8.27058e+06	5982188	3833581	2038147	5940161	3007910	3688898	1963395	2014638	4443473
82	1-methyl-4-imidazoleacetate	Amino Acid	Histidine Metabolism	32350	LC/MS Pos Early	100001208	2064	141.066	2625-49-2	75810	C05828	HMDB02820	4339675	4385751	4301920	5453201	2720858	6060177	5033954	5208975	5635887	5502620
3340	N1-methyladenosine	Nucleotide	Purine Metabolism, Adenine containing	15650	LC/MS Pos Early	1242	2120	282.12	15763-06-1	27476	C02494	HMDB03331	640462	1021051	795072	916566	612365	711631	872851	1145857	638655	914170
81	1-methylhistamine	Amino Acid	Histidine Metabolism	43831	LC/MS Pos Early	100001204	3040	126.103	501-75-7	3614	C05127	HMDB00898	1211330	1651103	1.76027e+06	2980642	1082661	1625651	1114631	1783350	2176631	1751533
65	1-methylhistidine	Amino Acid	Histidine Metabolism	30460	LC/MS Neg	100001051	1227	168.078	332-80-9	92105	C01152	HMDB00001	96846	230060	153932	107199	240294	206787	355819	282186	154442	191100
3476	1-methylnicotinamide	Cofactors and Vitamins	Nicotinate and Nicotinamide Metabolism	27665	LC/MS Pos Early	55	1940	137.071	1005-24-9	10129985	C02918	HMDB00699	4487601	12644085	21510586	17162762	5744854	7.77565e+06	9669696	16941840	17613596	15341032
1721	1-myristoyl-2-arachidonoyl-GPC (14:0/20:4)*	Lipid	Phosphatidylcholine (PC)	53195	LC/MS Pos Late	100009139	1914	754.538				HMDB07883	6.92178e+06	11049433	10638133	10417183	12749443	8984954	8815591	10089950	11672555	10993522
1717	1-myristoyl-2-palmitoyl-GPC (14:0/16:0)	Lipid	Phosphatidylcholine (PC)	19258	LC/MS Pos Late	100000672	2147	706.538	69525-80-0	129657		HMDB07869	3239667	4194661	2838533	2618131	2627586	3094735	3.0647e+06	2300822	3361160	2668347
2235	1-myristoylglycerol (14:0)	Lipid	Monoacylglycerol	35625	LC/MS Neg	100001618	6353.3	227.202	75685-84-6	79050	C01885	HMDB11561	653904	1088935	836885	1444170	1043813	1252519	1525800	1000252	616409	1260858
1881	1-oleoyl-2-arachidonoyl-GPE (18:1/20:4)*	Lipid	Phosphatidylethanolamine (PE)	55041	LC/MS Pos Late	100009219	2200	766.538				HMDB09069	6717732	4844001	8882905	5162994	9375329	13240539	10066262	9842735	7057957	8229320
1974	1-oleoyl-2-arachidonoyl-GPI (18:1/20:4) *	Lipid	Phosphatidylinositol (PI)	54994	LC/MS Pos Late	100010951	2568	902.575				HMDB09844	16462465	19503836	12281144	11568686	14570750	10769849	8613571	11628717	20508156	14431743
1804	1-oleoyl-2-docosahexaenoyl-GPC (18:1/22:6)*	Lipid	Phosphatidylcholine (PC)	52697	LC/MS Pos Late	100009130	2011	832.585				HMDB08123	92371664	99183352	99983568	99871552	119628656	93850376	91555408	102334712	111640128	106649368
1884	1-oleoyl-2-docosahexaenoyl-GPE (18:1/22:6)*	Lipid	Phosphatidylethanolamine (PE)	53209	LC/MS Pos Late	100009220	2119	790.538					936709	1482729	1573414	1591914	1620527	2759087	1.82473e+06	2110980	1982612	1926062
1794	1-oleoyl-2-linoleoyl-GPC (18:1/18:2)*	Lipid	Phosphatidylcholine (PC)	52453	LC/MS Pos Late	100008981	2165	784.585					297524416	205030464	142578208	194182944	35501120	172070912	169815360	127770240	170309856	151639008
1878	1-oleoyl-2-linoleoyl-GPE (18:1/18:2)*	Lipid	Phosphatidylethanolamine (PE)	52687	LC/MS Pos Late	100009078	2270	742.538		9546753		HMDB05349	5.09809e+06	4026638	3.29824e+06	5700235	4515328	8634294	5.5162e+06	3.34355e+06	6.73244e+06	3.72107e+06
2242	1-oleoylglycerol (18:1)	Lipid	Monoacylglycerol	21184	LC/MS Neg	100000924	6650	281.249	111-03-5	5283468		HMDB11567	26593344	48097788	41828456	55474344	117075440	106606576	45452776	100209568	58137868	157871776
2015	1-oleoyl-GPC (18:1)	Lipid	Lysophospholipid	48258	LC/MS Pos Late	100001272	1540	522.355	19420-56-5	16081932		HMDB02815	514950080	580423744	427632128	393444768	486224096	415438976	412693664	404065248	501741888	505590560
2062	1-oleoyl-GPE (18:1)	Lipid	Lysophospholipid	35628	LC/MS Pos Late	100001569	1554	480.308	89576-29-4	9547071		HMDB11506	13641660	13058943	7779796	7741930	12570076	13408470	10373927	8310823	10106354	11113640
2095	1-oleoyl-GPG (18:1)*	Lipid	Lysophospholipid	45968	LC/MS Neg	100005716	5610	509.288					2258748	1199801	1233993	1057584	1485944	1123435	1155284	622287	1070495	995339
2103	1-oleoyl-GPI (18:1)*	Lipid	Lysophospholipid	36602	LC/MS Neg	100001777	5599	597.305					8178166	3245512	2315175	651684	2169340	1004525	3193482	653257	591952	3.53456e+06
1760	1-palmitoleoyl-2-linolenoyl-GPC (16:1/18:3)*	Lipid	Phosphatidylcholine (PC)	53180	LC/MS Pos Late	100009345	1850	754.538				HMDB08008	2732645	3841191	3273420	3425296	4951530	4302698	4316479	3536715	5392079	4533324
2239	1-palmitoleoylglycerol (16:1)*	Lipid	Monoacylglycerol	52431	LC/MS Neg	100008952	6094	253.217				HMDB11565	3415269	6769449	6091076	7547444	6409470	6367268	6379665	6255841	7.82127e+06	7.42052e+06
2007	1-palmitoleoyl-GPC (16:1)*	Lipid	Lysophospholipid	33230	LC/MS Pos Late	100001511	1450	494.324		24779461		HMDB10383	66176856	73339232	49304764	48615664	52037300	50756852	49418852	45544620	64486452	60821188
1748	1-palmitoyl-2-arachidonoyl-GPC (16:0/20:4n6)	Lipid	Phosphatidylcholine (PC)	52462	LC/MS Pos Late	100008914	2091	782.569	35418-58-7	10747814		HMDB07982	696000448	1015231168	1009131392	967838912	915799168	755792384	952373440	981638976	1046704768	898658624
1855	1-palmitoyl-2-arachidonoyl-GPE (16:0/20:4)*	Lipid	Phosphatidylethanolamine (PE)	52464	LC/MS Pos Late	100008990	2198	740.522		9546800		HMDB05323	6510489	8247557	9675840	8593074	8903243	13166268	12843041	10203079	11928765	8739477
1954	1-palmitoyl-2-arachidonoyl-GPI (16:0/20:4)*	Lipid	Phosphatidylinositol (PI)	52467	LC/MS Pos Late	100008993	2567	876.56				HMDB09789	14634818	36867632	19275130	26269224	18220178	13905199	18273180	18564720	31220108	22557996
1744	1-palmitoyl-2-dihomo-linolenoyl-GPC (16:0/20:3n3 or 6)*	Lipid	Phosphatidylcholine (PC)	52454	LC/MS Pos Late	100008985	2199	784.585					377725184	640203904	537528832	446971584	427330080	418757504	468842880	481031392	686004608	531185984
1754	1-palmitoyl-2-docosahexaenoyl-GPC (16:0/22:6)	Lipid	Phosphatidylcholine (PC)	52610	LC/MS Pos Late	100008915	2023	806.569	59403-54-2	6441886		HMDB07991	439629088	694254464	706285376	716382016	666745728	529686720	658834560	668890240	758986240	681839616
1857	1-palmitoyl-2-docosahexaenoyl-GPE (16:0/22:6)*	Lipid	Phosphatidylethanolamine (PE)	52465	LC/MS Pos Late	100008991	2119	764.522		9546799		HMDB05324	4073254	8314668	8471518	8408158	7370996	12640254	11449393	10613915	11473429	9387392
1741	1-palmitoyl-2-gamma-linolenoyl-GPC (16:0/18:3n6)*	Lipid	Phosphatidylcholine (PC)	54812	LC/MS Pos Late	100009154	2034	756.554				HMDB07974	33055636	54994132	43804968	50156668	39593196	36183456	41548992	30260482	58553224	39756468
1738	1-palmitoyl-2-linoleoyl-GPC (16:0/18:2)	Lipid	Phosphatidylcholine (PC)	42446	LC/MS Pos Late	1537	2160	758.569	40811-94-7	5287971		HMDB07973	1551763584	1807496960	1778155648	1830826368	1666061696	1557584768	1753089664	1504136960	1984186496	1669096832
1852	1-palmitoyl-2-linoleoyl-GPE (16:0/18:2)	Lipid	Phosphatidylethanolamine (PE)	42449	LC/MS Pos Late	100001870	2275	716.522		9546747		HMDB05322	7394844	8758695	5.68041e+06	9688189	6699467	13233912	9948650	5520526	12315548	5666207
1952	1-palmitoyl-2-linoleoyl-GPI (16:0/18:2)	Lipid	Phosphatidylinositol (PI)	52450	LC/MS Pos Late	1528	2730	852.56				HMDB09784	7.27854e+06	7618048	7232510	5909185	8142314	4730536	5935491	5294586	7856823	7341656
1735	1-palmitoyl-2-oleoyl-GPC (16:0/18:1)	Lipid	Phosphatidylcholine (PC)	52461	LC/MS Pos Late	1539	2358	760.585	26853-31-6;26853-31-6	6436017		HMDB07972	765457216	1097806720	918434176	1008594688	731403968	714299584	919029952	880433920	1057869632	926879424
1851	1-palmitoyl-2-oleoyl-GPE (16:0/18:1)	Lipid	Phosphatidylethanolamine (PE)	19263	LC/MS Pos Late	1526	2509	718.538	26662-94-2	5283496		HMDB05320	5703428	5535656	5183156	5485711	4058724	8703041	7582951	4885977	7.90043e+06	5348115
1950	1-palmitoyl-2-oleoyl-GPI (16:0/18:1)*	Lipid	Phosphatidylinositol (PI)	52669	LC/MS Polar	100009066	893	835.534				HMDB09783	831052	758204	724313	648912	959390	1434694	986771	594266	651849	752009
1732	1-palmitoyl-2-palmitoleoyl-GPC (16:0/16:1)*	Lipid	Phosphatidylcholine (PC)	52470	LC/MS Pos Late	100008984	2160	732.554				HMDB07969	53944380	85053752	65311156	66581224	45793872	46748296	64634976	56514536	82645240	64537024
1733	1-palmitoyl-2-stearoyl-GPC (16:0/18:0)	Lipid	Phosphatidylcholine (PC)	52616	LC/MS Pos Late	100008921	2653	762.601	59403-51-9			HMDB07970	51353232	129879864	69669392	93084144	69489496	49747520	64930756	59125740	97704560	60310088
2238	1-palmitoylglycerol (16:0)	Lipid	Monoacylglycerol	21127	LC/MS Neg	100000827	6550	255.233	542-44-9	14900		HMDB31074	8.23245e+06	5564997	5739883	11535224	12950291	18404368	11006464	24740964	6904590	21799578
2005	1-palmitoyl-GPC (16:0)	Lipid	Lysophospholipid	33955	LC/MS Pos Late	100001263	1525	496.34	17364-16-8	86554		HMDB10382	822271552	1141688704	896342528	829090816	980513728	848899328	931564096	864174912	975926080	1028309440
2053	1-palmitoyl-GPE (16:0)	Lipid	Lysophospholipid	35631	LC/MS Pos Late	100001567	1544	454.293	53862-35-4	9547069		HMDB11503	9968071	14495781	11107120	9660287	12589740	12170833	12621799	11476067	12478623	13827035
2091	1-palmitoyl-GPG (16:0)*	Lipid	Lysophospholipid	45970	LC/MS Neg	100005717	5570	483.273		3300276			421195	286002	259190	188938	321325	217741	187669	164508	297007	222583
2098	1-palmitoyl-GPI (16:0)	Lipid	Lysophospholipid	35305	LC/MS Neg	100001655	5564	571.289				HMDB61695	5693667	4.10997e+06	1657936	552262	2276154	1400045	3622563	1228524	500362	4086446
83	1-ribosyl-imidazoleacetate*	Amino Acid	Histidine Metabolism	61868	LC/MS Pos Early	100001668	2006	259.092	29605-99-0	5117448	C05131	HMDB02331	1.63767e+06	2.42446e+06	3.81932e+06	3.46243e+06	2.75647e+06	3.03364e+06	2.7365e+06	3.07513e+06	3.94055e+06	2.65877e+06
1781	1-stearoyl-2-arachidonoyl-GPC (18:0/20:4)	Lipid	Phosphatidylcholine (PC)	42450	LC/MS Pos Late	100001869	2300	810.601	35418-59-8	16219824		HMDB08048	641633280	879550528	839934912	856543296	877209472	709168960	826473536	884599680	897677440	864356480
1872	1-stearoyl-2-arachidonoyl-GPE (18:0/20:4)	Lipid	Phosphatidylethanolamine (PE)	52447	LC/MS Pos Late	100008977	2424	768.554		5289133		HMDB09003	21666254	18472280	29781886	21756070	31657120	41606872	37689780	35631184	26958530	28931040
1969	1-stearoyl-2-arachidonoyl-GPI (18:0/20:4)	Lipid	Phosphatidylinositol (PI)	52449	LC/MS Pos Late	100000616	3000	904.591	383907-33-3			HMDB09815	91292472	152371408	117542280	122080224	111065216	92891496	103367296	106796192	144370528	125752720
1787	1-stearoyl-2-docosahexaenoyl-GPC (18:0/22:6)	Lipid	Phosphatidylcholine (PC)	52611	LC/MS Pos Late	100008916	2197	834.601	59403-52-0			HMDB08057	135876832	308530688	270370656	284233696	271538880	191579584	279303168	277327424	307057216	296362240
1876	1-stearoyl-2-docosahexaenoyl-GPE (18:0/22:6)*	Lipid	Phosphatidylethanolamine (PE)	52466	LC/MS Pos Late	100008992	2317	792.554		9546798		HMDB05334	994027	2554612	1.64559e+06	2863894	2037530	2792722	2830252	2448914	3198931	2084532
1773	1-stearoyl-2-linoleoyl-GPC (18:0/18:2)*	Lipid	Phosphatidylcholine (PC)	52452	LC/MS Pos Late	100008980	2380	786.601				HMDB08039	1547205888	1999536896	1436235904	1698278400	1614263424	1330073984	1469020416	1309483776	1889192192	1422772992
1867	1-stearoyl-2-linoleoyl-GPE (18:0/18:2)*	Lipid	Phosphatidylethanolamine (PE)	52446	LC/MS Pos Late	100008976	2522	744.554		9546749		HMDB08994	36095152	33291062	24070424	34687288	32334858	48171400	35400512	24576962	38927872	25071108
1958	1-stearoyl-2-linoleoyl-GPI (18:0/18:2)	Lipid	Phosphatidylinositol (PI)	52468	LC/MS Pos Late	100008994	3185	880.591				HMDB09809	22219700	22425808	17219332	16526593	21075952	16250319	15808820	11525910	18435566	18659848
1770	1-stearoyl-2-oleoyl-GPC (18:0/18:1)	Lipid	Phosphatidylcholine (PC)	52438	LC/MS Pos Late	100008904	2644	788.616	56421-10-4			HMDB08038	614922752	1295433728	633228224	891777536	625522176	540401024	648631168	614804992	1096896128	702524928
1864	1-stearoyl-2-oleoyl-GPE (18:0/18:1)	Lipid	Phosphatidylethanolamine (PE)	42448	LC/MS Pos Late	100001856	2858	746.569				HMDB08993	4528947	2735560	3792589	2255496	4759787	9141274	7148712	4510214	4246734	4668742
1943	1-stearoyl-2-oleoyl-GPG (18:0/18:1)	Lipid	Phosphatidylglycerol (PG)	52623	LC/MS Polar	100001866	717	775.549	322647-48-3				1454246	1448967	2725937	1413194	2984353	2.06562e+06	1620563	1556068	1665789	2516199
2013	1-stearoyl-GPC (18:0)	Lipid	Lysophospholipid	33961	LC/MS Pos Late	100001271	1606	524.371	19420-57-6	497299		HMDB10384	532561024	881086784	614092224	608827584	722133888	560985344	618943744	619094144	746386240	751600960
2060	1-stearoyl-GPE (18:0)	Lipid	Lysophospholipid	42398	LC/MS Pos Late	100001461	1626	482.324	69747-55-3	9547068		HMDB11130	13783308	19414604	14568390	12741769	15717301	14815050	14989990	14170125	15449799	18410362
2101	1-stearoyl-GPI (18:0)	Lipid	Lysophospholipid	19324	LC/MS Neg	100000656	5794	599.32	796963-93-4			HMDB61696	10169755	8.0391e+06	3355938	2837057	5323434	3612268	6.97546e+06	3804801	1.72648e+06	10233578
313	2,3-dihydroxy-2-methylbutyrate	Amino Acid	Leucine, Isoleucine and Valine Metabolism	57547	LC/MS Neg	100010869	787	133.051	14868-24-7	301941		HMDB29576	584728	1472546	548905	661564	658238	913684	583955	439912	1114951	870678
3789	2,3-dihydroxyisovalerate	Xenobiotics	Food Component/Plant	38276	LC/MS Polar	100002417	1050	133.051	1756-18-9	677	C04039	HMDB12141	1114613	920819	873490	808922	1366777	3214778	2018979	1425532	1214799	1788330
3793	2,8-quinolinediol sulfate	Xenobiotics	Food Component/Plant	48691	LC/MS Neg	100004321	2612	239.997					2702871	3371610	83520	122521		3.56203e+06	7407520	5640596	5326395	3167214
101	2-aminoadipate	Amino Acid	Lysine Metabolism	6146	LC/MS Polar	381	3500	160.062	542-32-5;1118-90-7	469	C00956	HMDB00510	4463382	3789023	4292832	4150042	3436422	4971303	6031634	5915459	4669826	4803808
427	2-aminobutyrate	Amino Acid	Glutathione Metabolism	42374	LC/MS Pos Early	1128	2059	104.071	1492-24-6	439691	C02261	HMDB00650	22205308	20461556	22269016	22484738	19844444	21607116	22327830	22949868	27754170	17924448
1356	2-aminooctanoate	Lipid	Fatty Acid, Amino	43343	LC/MS Pos Late	100004227	750	160.133	644-90-6	69522		HMDB00991	473529	502504	478334	486432	570480	591917	693094	483471	622867	598974
3658	2-amino-p-cresol sulfate	Xenobiotics	Benzoate Metabolism	37180	LC/MS Neg	100001801	2320	202.018					241006	1226459	976202	1283544	231134	2622638	1517764	1643897	437149	1117313
4600	2-aminophenol sulfate	Xenobiotics	Chemical	43266	LC/MS Neg	100004322	1677	188.002		181670		HMDB61116	5413830	8122628	5213046	7.61625e+06	1.55901e+06	4626498	5183878	5321520	4533908	5078491
3441	2'-deoxycytidine	Nucleotide	Pyrimidine Metabolism, Cytidine containing	15949	LC/MS Pos Early	100000125	2193	228.098	951-77-9	13711	C00881	HMDB00014	4748398	4859967	4670593	6969278	6.6204e+06	7.29931e+06	6599654	7611922	5215212	7.2723e+06
3417	2'-deoxyuridine	Nucleotide	Pyrimidine Metabolism, Uracil containing	52602	LC/MS Neg	536	1586	227.067	951-78-0	13712	C00526	HMDB00012	3.87837e+06	4791685	2208299	2400198	3633452	4340138	3383276	3151788	3098132	2972164
308	2-hydroxy-3-methylvalerate	Amino Acid	Leucine, Isoleucine and Valine Metabolism	36746	LC/MS Neg	100001541	1800	131.071	488-15-3	164623		HMDB00317	4433351	3709789	6046134	4982371	4136386	3416323	4716297	4548777	6608022	4939281
1292	2-hydroxyadipate	Lipid	Fatty Acid, Dicarboxylate	31934	LC/MS Polar	100001153	3000	161.046	18294-85-4	193530	C02360	HMDB00321	3146266	5818029	2599860	3978564	1163037	3806431	5431835	2189603	3449478	2195646
429	2-hydroxybutyrate/2-hydroxyisobutyrate	Amino Acid	Glutathione Metabolism	52281	LC/MS Polar	100008928	1258	103.04					102412184	103502880	123060576	129755328	72041728	41514632	44050636	58169300	180263328	52532876
1475	2-hydroxydecanoate	Lipid	Fatty Acid, Monohydroxy	42489	LC/MS Neg	100004089	4840	187.134	5393-81-7	21488			288576	199167	123977	160872	427590	267567	226651	187337	194831	197383
1288	2-hydroxyglutarate	Lipid	Fatty Acid, Dicarboxylate	37253	LC/MS Polar	100002070	3352.8	147.03	40951-21-1	43	C02630	HMDB00606	39029140	55262164	56177452	62903488	33420032	48262724	37938192	27017506	78035528	25492618
3593	2-hydroxyhippurate (salicylurate)	Xenobiotics	Benzoate Metabolism	18281	LC/MS Neg	1869	2184	194.046	487-54-7	10253	C07588	HMDB00840	61842	197100	198950	200935	52209	40186	57233	72327	232406
1474	2-hydroxyoctanoate	Lipid	Fatty Acid, Monohydroxy	22036	LC/MS Neg	100000743	3736.8	159.103	617-73-2	94180		HMDB02264	161525	98012	125485	99020	128547	85072	102225	89592	164105	119282
1480	2-hydroxypalmitate	Lipid	Fatty Acid, Monohydroxy	35675	LC/MS Neg	100001579	5511.2	271.228	764-67-0	92836		HMDB31057	7.65994e+06	5008268	3881012	5608978	6260680	6183828	4.03087e+06	5.90034e+06	5913567	6.20441e+06
1482	2-hydroxystearate	Lipid	Fatty Acid, Monohydroxy	17945	LC/MS Neg	1239	5695	299.259	629-22-1	69417	C03045		9950512	4714204	3056969	2658274	5350065	4051175	4302108	4021667	3440203	6.80351e+06
3796	2-isopropylmalate	Xenobiotics	Food Component/Plant	15667	LC/MS Polar	100000409	2605	175.061	3237-44-3	77	C02504	HMDB00402	553705	1118020	940433	1269486	1105086	1875687	1352876	1051821	3275337	411970
2257	2-linoleoylglycerol (18:2)	Lipid	Monoacylglycerol	32506	LC/MS Neg	100000987	6250	279.233	3443-82-1	5365676		HMDB11538	2463317	1962253	3079741	4787912	3.69385e+06	3346886	2713022	2998181	6187695	3175029
290	2-methylbutyrylcarnitine (C5)	Amino Acid	Leucine, Isoleucine and Valine Metabolism	45095	LC/MS Pos Early	100001509	3035	246.17	31023-25-3	6426901		HMDB00378	1082220	1557644	1250540	3518790	363225	166298	144840	118256	4429443	253792
291	2-methylbutyrylglycine	Amino Acid	Leucine, Isoleucine and Valine Metabolism	31928	LC/MS Neg	100001155	1884	158.082	52320-67-9	193872		HMDB00339	120054	813619	440604	386555	188101	244453	323826	377868	790866	197529
15	2-methylserine	Amino Acid	Glycine, Serine and Threonine Metabolism	53229	LC/MS Pos Early	100009246	1652	120.066		94309	C02115		2775262	3671590	3855975	2898446	3424170	3741175	4208232	4.11113e+06	4369189	3478126
2256	2-oleoylglycerol (18:1)	Lipid	Monoacylglycerol	21232	LC/MS Neg	100000943	6500	281.249	3443-84-3	5319879		HMDB11537	2823322	3799400	7013981	11845904	9674647	9395602	4636029	9137945	19857160	14159855
3442	2'-O-methylcytidine	Nucleotide	Pyrimidine Metabolism, Cytidine containing	57554	LC/MS Pos Early	100010895	2411	258.108	2140-72-9	150971			1366917	1335186	1189666	1577101	883190	752907	1142432	1.03241e+06	1583590	668354
3405	2'-O-methyluridine	Nucleotide	Pyrimidine Metabolism, Uracil containing	57655	LC/MS Neg	100010896	1831	257.078	2140-76-3	102212			162130	198392	243330	150907	117825	113545	129966	128177	350306	157081
3797	2-oxindole-3-acetate	Xenobiotics	Food Component/Plant	40479	LC/MS Neg	100003109	2076	190.051	2971-31-5	3080590		HMDB35514	641132	1212767	2702544	1804354	428466	694884	1018411	791746	1147928	612269
103	2-oxoadipate	Amino Acid	Lysine Metabolism	38347	LC/MS Polar	92	2633.1	159.03	3184-35-8	71	C00322	HMDB00225	19987412	30436532	14364138	30440116	15823890	17266660	24915144	10660549	31220280	11109661
360	2-oxoarginine*	Amino Acid	Urea cycle; Arginine and Proline Metabolism	55072	LC/MS Pos Early	100002784	1760	174.087	3715-10-04	558	C03771	HMDB04225	2473736	3692749	4749468	3698267	2424567	3958464	4564329	5057656	3450033	4809752
2254	2-palmitoleoylglycerol (16:1)*	Lipid	Monoacylglycerol	52432	LC/MS Neg	100008953	6016	253.217				HMDB11565	632358	842142	1066294	1798671	1040664	949519	783831	784294	2925491	957434
2008	2-palmitoleoyl-GPC (16:1)*	Lipid	Lysophospholipid	35819	LC/MS Pos Late	100001561	1425	494.324				HMDB10383	4481276	6208730	3.32431e+06	3999078	3.99702e+06	3.62307e+06	3.97512e+06	2.95754e+06	8.31206e+06	4727995
2006	2-palmitoyl-GPC (16:0)*	Lipid	Lysophospholipid	35253	LC/MS Pos Late	100001562	1505	496.34		15061532		HMDB61702	97891664	138020016	121486736	96117472	108217392	94091320	108582072	127777768	133211968	146844016
2061	2-stearoyl-GPE (18:0)*	Lipid	Lysophospholipid	41220	LC/MS Neg	100003901	6350	480.31				HMDB11129	5408786	4.02652e+06	6.7657e+06	1669115	2206506	1710629	5684127	2200940	3406110	2761751
3670	3-(3-hydroxyphenyl)propionate	Xenobiotics	Benzoate Metabolism	35635	LC/MS Neg	100001624	1980	165.056	621-54-5	91	C11457	HMDB00375	374839	636265		177982	264155		113548	51678	242437
3667	3-(3-hydroxyphenyl)propionate sulfate	Xenobiotics	Benzoate Metabolism	45415	LC/MS Neg	100005391	1294	245.013	86321-32-6	187488			8593495	42274632	8.38165e+06	9752663	4687127	4830731	8.21198e+06	6589241	8781758	5046434
142	3-(4-hydroxyphenyl)lactate	Amino Acid	Tyrosine Metabolism	32197	LC/MS Neg	240	1379	181.051	6482-98-0	9378	C03672	HMDB00755	24435136	32848112	32533470	33904048	13415850	21148838	25120284	27241198	32075024	16728119
3671	3-(4-hydroxyphenyl)propionate	Xenobiotics	Benzoate Metabolism	39587	LC/MS Neg	100002914	1670	165.056	501-97-3	10394	C01744	HMDB02199	189854	377266	315938	224784		128258	310418	124194	366480	137152
4598	3-acetylphenol sulfate	Xenobiotics	Chemical	48693	LC/MS Neg	100004326	2477	215.002					627086	1968768	979408	649874	295489	1482448	1135847	1119183	747588	1518525
3455	3-aminoisobutyrate	Nucleotide	Pyrimidine Metabolism, Thymine containing	1566	LC/MS Pos Early	1114	2190	104.071	10569-72-9;214139-20-5	64956	C05145	HMDB03911	365167	437352	412570	907774	391582		385347	364310	834103	314461
2731	3-dehydrocholate	Lipid	Secondary Bile Acid Metabolism	43835	LC/MS Neg	100001062	5050	405.265	2304-89-4	159655		HMDB00502	3329116	121946	389867	123983	66747	287674	135005	113412	38950	158014
295	3-hydroxy-2-ethylpropionate	Amino Acid	Leucine, Isoleucine and Valine Metabolism	32397	LC/MS Polar	100001170	1443.3	117.056	4374-62-3	188979		HMDB00396	2160531	3275685	1830469	2267249	2310611	1356105	1880718	2026364	2741472	2319510
2480	3-hydroxy-3-methylglutarate	Lipid	Mevalonate Metabolism	531	LC/MS Polar	112	2850	161.046	503-49-1	1662	C03761	HMDB00355	95737584	130321664	145404240	135004112	57120928	59620984	116496464	82090168	125716456	89306640
1293	3-hydroxyadipate*	Lipid	Fatty Acid, Dicarboxylate	62069	LC/MS Polar	100004396	3131	161.046		151913		HMDB00345	1533331	2.46913e+06	4349948	4140729	1264708	2745756	5470649	2120702	5161309	1627091
1457	3-hydroxybutyrate (BHBA)	Lipid	Ketone Bodies	542	LC/MS Polar	254	1444	103.04	625-72-9	441	C01089	HMDB00357	40502768	102945472	77486568	109595888	39345880	15576282	37372664	37567528	61465168	29608448
1397	3-hydroxybutyrylcarnitine (1)	Lipid	Fatty Acid Metabolism(Acyl Carnitine)	43264	LC/MS Pos Early	100003926	2400	248.149		53481617		HMDB13127	1063282	2222709	5486137	7414619	885946	662514	787479	481603	9133118	551618
1398	3-hydroxybutyrylcarnitine (2)	Lipid	Fatty Acid Metabolism(Acyl Carnitine)	52984	LC/MS Pos Early	100009271	2340	248.149				HMDB13127	1822472	1794783	3839687	6659224	1462558	980077	712188	737493	6765272	712108
1490	3-hydroxydecanoate	Lipid	Fatty Acid, Monohydroxy	22053	LC/MS Neg	100000997	4634.7	187.134	5561-87-5	26612		HMDB02203	287128	606676	663835	719910	839674	233386	198580	249188	985527	269449
1488	3-hydroxyhexanoate	Lipid	Fatty Acid, Monohydroxy	53230	LC/MS Neg	100006367	1725	131.071	10191-24-9	151492			534791	525287	1365937	2663795	302182	149648	209454	278766	2055230	597070
3808	3-hydroxyindolin-2-one	Xenobiotics	Food Component/Plant	42561	LC/MS Pos Early	100003823	2035	132.044	61-71-2	6097	C11130		421617	677042	287793	374766		517831	587572	187459	701551	652133
4703	3-hydroxyindolin-2-one sulfate	Xenobiotics	Chemical	48419	LC/MS Neg	100006103	2082	227.997					151816	221547	140688	127635	56834	171918	183364	360390	62456	171760
312	3-hydroxyisobutyrate	Amino Acid	Leucine, Isoleucine and Valine Metabolism	1549	LC/MS Polar	111	1619	103.04	2068-83-9	87	C06001	HMDB00336	35528456	47353408	36417432	39726080	35171840	13412605	15804798	21076898	37908944	13734139
1493	3-hydroxylaurate	Lipid	Fatty Acid, Monohydroxy	32457	LC/MS Neg	100001112	5175	215.165	53941-38-1	94216		HMDB00387	440909	870421	1362047	1709174	1542385	503458	179955	389566	2648297	361745
1489	3-hydroxyoctanoate	Lipid	Fatty Acid, Monohydroxy	22001	LC/MS Neg	100000773	3446	159.103	88930-08-9	26613		HMDB01954	345890	435976	510379	784913	487858	159785	192946	196432	797817	281752
1496	3-hydroxypalmitate	Lipid	Fatty Acid, Monohydroxy	27503	LC/MS Neg	100000983	5476	271.228	928-17-6	301590		HMDB10734	1.12684e+06	1196682	1.40636e+06	2550892	1620444	1753466	848475	1.04768e+06	4043539	1.12016e+06
4701	3-hydroxypyridine sulfate	Xenobiotics	Chemical	48448	LC/MS Neg	100006098	1595.5	173.987	1955-23-3				473986	516225	421184	387134	190096	410229	579477	533958	223972	514713
1492	3-hydroxysebacate	Lipid	Fatty Acid, Monohydroxy	31943	LC/MS Neg	100001145	1282	217.108	73141-46-5	3017884		HMDB00350	115120	163050	126275	86001	109375	80315	59681	96393	133109	97225
1524	3-hydroxystearate	Lipid	Fatty Acid, Monohydroxy	52938	LC/MS Neg	100008933	5674	299.259	45261-96-9	5282907			1372479	1673710	1059417	1761600	2.00885e+06	1736965	1179859	1.03477e+06	2787907	1.15454e+06
247	3-indoxyl sulfate	Amino Acid	Tryptophan Metabolism	27672	LC/MS Neg	100000467	2222.2	212.002	2642-37-7	10258		HMDB00682	95913424	168239888	122007304	114232296	102969424	151749664	142604416	174244944	79999568	150224032
3648	3-methoxycatechol sulfate (2)	Xenobiotics	Benzoate Metabolism	48752	LC/MS Neg	100006376	2200	218.997					248056	299849	206149	394761		128378	253018	256866	235783
159	3-methoxytyrosine	Amino Acid	Tyrosine Metabolism	12017	LC/MS Pos Early	1342	2555	212.092	300-48-1	1670		HMDB01434	182783	161951	197474	139558	194411	275541	251333	221623	186504	193359
307	3-methyl-2-oxobutyrate	Amino Acid	Leucine, Isoleucine and Valine Metabolism	44526	LC/MS Neg	100000936	1465	115.04	3715-29-5	49	C00141	HMDB00019	14395839	11838601	9706983	9555950	12026674	7306660	7056029	6332736	6921082	7712183
287	3-methyl-2-oxovalerate	Amino Acid	Leucine, Isoleucine and Valine Metabolism	15676	LC/MS Neg	100000036	2064.2	129.056	1460-34-0;51829-07-3	47	C00671	HMDB03736	32478880	29768792	22049058	21968994	25182560	14500473	14235623	15642954	21509820	16018586
1294	3-methyladipate	Lipid	Fatty Acid, Dicarboxylate	36749	LC/MS Polar	100001765	2865	159.066	3058-01-03	12292		HMDB00555	247904	704594	608443	540527	152167	164506	452027	390688	615933	264663
267	3-methylcrotonylglycine	Amino Acid	Leucine, Isoleucine and Valine Metabolism	31940	LC/MS Pos Early	100001149	1980	158.081	33008-07-0	169485		HMDB00459	241063	747480	516825	745855	641546	743144	553142	695074	825111	401050
3433	3-methylcytidine	Nucleotide	Pyrimidine Metabolism, Cytidine containing	35132	LC/MS Pos Early	100001466	2176	258.108	21028-20-6	159649			77326	156257	83061	78964	97004	52680	130495	118661	80460	60270
271	3-methylglutaconate	Amino Acid	Leucine, Isoleucine and Valine Metabolism	57747	LC/MS Polar	100002458	2700	99.0452	5746-90-7	1551553		HMDB00522	871578	905247	900831	811799	563481	715010	867148	528439	662792	600416
66	3-methylhistidine	Amino Acid	Histidine Metabolism	15677	LC/MS Neg	100000042	906.3	168.078	368-16-1	64969	C01152	HMDB00479	1467462	1.84562e+06	1327062	1059517	2702918	2418202	2451649	2370952	729302	1913036
3672	3-phenylpropionate (hydrocinnamate)	Xenobiotics	Benzoate Metabolism	15749	LC/MS Neg	100000010	2860	149.061	501-52-0	107	C05629	HMDB00764	16100081	6873014	27149660	34449124	3022484	2158182	3231787	3631715	17797444	3421946
922	3-phosphoglycerate	Carbohydrate	Glycolysis, Gluconeogenesis, and Pyruvate Metabolism	1414	LC/MS Pos Early	132	590	187	80731-10-8	724	C00597	HMDB00807	547700		425082	240908	559704	175664	152191	417611	125422	128995
3420	3-ureidopropionate	Nucleotide	Pyrimidine Metabolism, Uracil containing	3155	LC/MS Pos Early	1053	875	133.061	462-88-4	111	C02642	HMDB00026	12385044	15399028	33879568	35283060	5421318	8454557	20768818	15821034	34648620	11064008
410	4-acetamidobutanoate	Amino Acid	Polyamine Metabolism	1558	LC/MS Pos Early	1113	1350	146.081	3025-96-5	18189	C02946	HMDB03681	908029	772321	1166247	1209599	657115	1.3892e+06	1394048	1455022	906666	1663795
4528	4-acetylphenol sulfate	Xenobiotics	Drug - Other	44620	LC/MS Neg	100000711	2375	215.002		4684006			79836	138561	133397	146839	19885	118354	138229	104958	101973	120627
4033	4-allylphenol sulfate	Xenobiotics	Food Component/Plant	37181	LC/MS Neg	100001868	3805	213.023					138726	101143	53651	73611	34019	92224	57751	60040	90723	93531
2518	4-cholesten-3-one	Lipid	Sterol	38125	LC/MS Pos Late	100002227	2520	385.346	601-57-0	91477	C00599	HMDB00921	274043	608454	458116	897969	322172	302265	249490	218135	667921	368882
3634	4-ethylphenylsulfate	Xenobiotics	Benzoate Metabolism	36099	LC/MS Neg	100001756	3580	201.023	123-07-9		C13637		94864	82815	160070	307016	162700	436934	1035826	489323	67443	271272
414	4-guanidinobutanoate	Amino Acid	Guanidino and Acetamido Metabolism	15681	LC/MS Pos Early	100000096	2320	146.092	463-003;463-00-3	500	C01035	HMDB03464	7569570	7472658	22537240	19232248	2962675	3732250	15237744	8.21962e+06	44313868	5036616
1289	4-hydroxy-2-oxoglutaric acid	Lipid	Fatty Acid, Dicarboxylate	40062	LC/MS Polar	100002537	3073	161.009	1187-99-1	599	C01127	HMDB02070	12299554	13179259	14372515	12057165	16132211	14048256	16821538	9569726	8888378	10225195
1471	4-hydroxybutyrate (GHB)	Lipid	Fatty Acid, Monohydroxy	34585	LC/MS Pos Early	100001507	1148	87.0441	502-85-2	10413	C00989	HMDB00710	649993	501520	3855807	13136307	978415	763543			13208548
4122	4-hydroxycinnamate	Xenobiotics	Food Component/Plant	36770	LC/MS Neg	100001675	1457	163.04	501-98-4	637542	C00811	HMDB02035	526793	279327	200189	339586	256280	506719	374422	172634	178737
186	4-hydroxycinnamate sulfate	Amino Acid	Tyrosine Metabolism	48410	LC/MS Neg	100006095	1000	242.997	376374-66-2	6070438			687566	639960	642326	543988	236436	602388	779813	326885	476084	234851
3595	4-hydroxyhippurate	Xenobiotics	Benzoate Metabolism	35527	LC/MS Neg	100001423	1475	194.046	2482-25-9	151012		HMDB13678	271853	493242	446942	273893	202369	509101	507485	542421	611951	386672
139	4-hydroxyphenylpyruvate	Amino Acid	Tyrosine Metabolism	1669	LC/MS Neg	1141	1690	179.035	156-39-8	979	C01179	HMDB00707	7.67733e+06	6903406	5301817	5172080	3473652	4656483	7073135	5958076	4986068	5319873
84	4-imidazoleacetate	Amino Acid	Histidine Metabolism	32349	LC/MS Pos Early	100001207	2055	127.05	645-65-8	96215	C02835	HMDB02024	1684458	1123443	1445420	1.46821e+06	1336575	1110228	1290002	1250863	1886601	1242645
253	4-methyl-2-oxopentanoate	Amino Acid	Leucine, Isoleucine and Valine Metabolism	22116	LC/MS Neg	100000551	2170	129.056	816-66-0	70	C00233	HMDB00695	16239720	12572578	13552854	12887966	9140937	5.96991e+06	6565260	7864535	13751530	7908084
3624	4-methylcatechol sulfate	Xenobiotics	Benzoate Metabolism	46146	LC/MS Neg	100004111	2665	203.002					2283958	3255400	936682	1278726	725720	1060986	3365353	2435940	1401387	681442
3635	4-vinylphenol sulfate	Xenobiotics	Benzoate Metabolism	36098	LC/MS Neg	100001755	3320	199.007	2628-17-3	6426766	C05627	HMDB04072	526905	699000	534099	535061	580303	774975	790363	708127	569983	573229
3453	5,6-dihydrothymine	Nucleotide	Pyrimidine Metabolism, Thymine containing	1418	LC/MS Pos Early	158	1280	129.066	696-04-8	93556	C00906	HMDB00079	980118	175513	269195	275417	120557	301670	214108	302251	400154	141244
3404	5,6-dihydrouridine	Nucleotide	Pyrimidine Metabolism, Uracil containing	61833	LC/MS Neg	100001425	1119	245.078	5627-05-04	94312			1718256	2304304	1594872	1519921	1911625	1982768	2192639	2519687	2061635	2369198
113	5-aminovalerate	Amino Acid	Lysine Metabolism	18319	LC/MS Pos Early	100000454	2220	118.086	660-88-8	138	C00431	HMDB03355	3634683	1.4366e+06	2409232	1699203	1030977	2183140	784239	992206	2983231	1101901
1405	5-dodecenoylcarnitine (C12:1)	Lipid	Fatty Acid Metabolism(Acyl Carnitine)	61769	LC/MS Pos Late	100016069	1135	342.264					345457	306191	270849	277729	312036	302371	317482	366376	497756	416917
1498	5-hydroxyhexanoate	Lipid	Fatty Acid, Monohydroxy	31938	LC/MS Neg	100001148	1267	131.071	44843-89-2	170748		HMDB00525	331260	427837	523054	734251	159970	286256	239555	243016	975225	292798
230	5-hydroxyindoleacetate	Amino Acid	Tryptophan Metabolism	437	LC/MS Neg	71	1510.2	190.051	54-16-0	1826	C05635	HMDB00763	273584	275309	254787	187507	134696	316053	206772	269050	200440	291750
98	5-hydroxylysine	Amino Acid	Lysine Metabolism	15685	LC/MS Pos Early	100000054	2790	163.108	13204-98-3	1029	C16741	HMDB00450	321294	676535	917382	755281	492153	488995	869214	949405	972893	600486
3443	5-methyl-2'-deoxycytidine	Nucleotide	Pyrimidine Metabolism, Cytidine containing	38159	LC/MS Pos Early	100002300	2303	242.114	838-07-3	440055	C03592	HMDB02224	455890	545947	431564	639091	733862	926769	757945	854215	493615	772474
3434	5-methylcytidine	Nucleotide	Pyrimidine Metabolism, Cytidine containing	22119	LC/MS Pos Early	100000763	2227	258.108	2140-61-6	92918		HMDB00982	312180	179439	327802	406918	451051	577434	370813	497351	297560	517447
405	5-methylthioadenosine (MTA)	Amino Acid	Polyamine Metabolism	1419	LC/MS Pos Early	212	2752	298.097	2457-80-9	439176	C00170	HMDB01173	2094529	2693950	2938560	3090719	1.88769e+06	2428379	2276133	3498908	2669093	2894451
3406	5-methyluridine (ribothymidine)	Nucleotide	Pyrimidine Metabolism, Uracil containing	35136	LC/MS Neg	100001446	1778.1	257.078	1463-10-1	445408		HMDB00884	223599	298502	212959	184798	167666	143462	151268	141686	344065	130022
426	5-oxoproline	Amino Acid	Glutathione Metabolism	1494	LC/MS Neg	1021	738.5	128.035	98-79-3	7405	C01879	HMDB00267	22940480	23640406	20321264	18240094	19722514	23271754	18672638	19307236	18065492	16665486
4712	6-hydroxyindole sulfate	Xenobiotics	Chemical	48698	LC/MS Neg	100006260	2498	212.002					714024	669801	448832	561461	266351	673071	574009	850598	307148	659844
2722	6-oxolithocholate	Lipid	Secondary Bile Acid Metabolism	46336	LC/MS Neg	100001068	5033	389.27	2393-61-5	164960			1054552	79612	81296	53189	20926	155673		27122		66860
110	6-oxopiperidine-2-carboxylate	Amino Acid	Lysine Metabolism	43231	LC/MS Neg	100004499	965	142.051	34622-39-4	3014237		HMDB61705	286690	562913	370456	759718	494910	651804	583549	629838	561531	580621
2505	7-alpha-hydroxy-3-oxo-4-cholestenoate (7-Hoca)	Lipid	Sterol	36776	LC/MS Neg	100001609	5288.1	429.301	115538-85-7	3081085	C17337	HMDB12458	2443882	998539	981187	1564284	955662	718264	474964	520676	1839394	825637
2736	7-ketodeoxycholate	Lipid	Secondary Bile Acid Metabolism	31904	LC/MS Neg	100001063	4821	405.265	911-40-0	188292		HMDB00391	76509088	5.78326e+06	10184460	3.20753e+06	1096906	3524084	1.63871e+06	1991699	3.95222e+06	3.30546e+06
2723	7-ketolithocholate	Lipid	Secondary Bile Acid Metabolism	43830	LC/MS Neg	100001069	5082	389.27	4651-67-6	444262		HMDB00467	4196266
3370	7-methylguanine	Nucleotide	Purine Metabolism, Guanine containing	35114	LC/MS Pos Early	100001456	2175	166.072	578-76-7	11361	C02242	HMDB00897	2836671	3.664e+06	3.60359e+06	3233694	1881641	2983833	3550607	4447733	2862156	3955319
1534	9,10-DiHOME	Lipid	Fatty Acid, Dihydroxy	38399	LC/MS Neg	179	5180	313.238	263399-34-4	9966640	C14828	HMDB04704	168429	154132	84151	205962	226312	200128	146007	129734	118153	135232
1395	acetylcarnitine (C2)	Lipid	Fatty Acid Metabolism(Acyl Carnitine)	32198	LC/MS Pos Early	100000802	2282	204.123	5080-50-2	1	C02571	HMDB00201	369409920	316501440	315663424	368141024	337639072	261700064	263095872	224525776	399877248	239978880
1103	aconitate [cis or trans]	Energy	TCA Cycle	46173	LC/MS Neg	100001359	580	173.009					130682224	132408800	109262080	110071056	108167024	125213360	110841536	128707864	92002816	103786104
3335	adenine	Nucleotide	Purine Metabolism, Adenine containing	554	LC/MS Pos Early	880	2221	136.062	73-24-5	190	C00147	HMDB00034	327388	464697	979700	3675067	254849	454873	479733	511787	16152100	494520
3334	adenosine	Nucleotide	Purine Metabolism, Adenine containing	555	LC/MS Neg	798	2075.4	134.047	58-61-7	60961	C00212	HMDB00050	366849	335068	272437	335260	465667	505511	483613	581198	254357	545106
3330	adenosine 3',5'-cyclic monophosphate (cAMP)	Nucleotide	Purine Metabolism, Adenine containing	2831	LC/MS Neg	207	1952.2	328.045	60-92-4	6076	C00575	HMDB00058	261329	249672	359562	317332	244985	155470	182919	202595	333153	199301
1290	adipate (C6-DC)	Lipid	Fatty Acid, Dicarboxylate	21134	LC/MS Polar	100000863	3000	145.051	124-04-9	196	C06104	HMDB00448	784214	1074710	1.36762e+06	1239199	585250	471498		568364	1989247	468043
1421	adipoylcarnitine (C6-DC)	Lipid	Fatty Acid Metabolism(Acyl Carnitine)	52988	LC/MS Pos Early	100006614	2558	290.16		71296139		HMDB61677	440405	233592	492611	553953	435221	596611	376989	508362	514644	410495
1211	adrenate (22:4n6)	Lipid	Polyunsaturated Fatty Acid (n3 and n6)	32980	LC/MS Neg	100001193	5678	331.264	2091-25-0	5497181	C16527	HMDB02226	17818162	15330218	15511845		23560792	8087161	14467083	8569957	11794323	14629181
28	alanine	Amino Acid	Alanine and Aspartate Metabolism	1126	LC/MS Pos Early	811	1700	90.055	56-41-7	5950	C00041	HMDB00161	819325632	645423872	1089658624	1003861888	795436672	669535232	813261696	844808832	1189509888	648410816
3322	allantoic acid	Nucleotide	Purine Metabolism, (Hypo)Xanthine/Inosine containing	33434	LC/MS Polar	218	2960	175.047	99-16-1	203	C00499	HMDB01209		499728		319992	344066	649671	535687	660271	363479	517606
3321	allantoin	Nucleotide	Purine Metabolism, (Hypo)Xanthine/Inosine containing	1107	LC/MS Polar	1002	1672	157.037	97-59-6	204	C02350	HMDB00462	125436256	221268512	190002832	188029152	162391568	202386144	213187072	201229712	268423424	192716592
256	alpha-hydroxyisocaproate	Amino Acid	Leucine, Isoleucine and Valine Metabolism	22132	LC/MS Neg	100000706	1840	131.071	10303-64-7	83697	C03264	HMDB00746	2838540	2355154	3715630	3.85878e+06	1787929	2102698	2838076	2805760	3.13942e+06	2258616
288	alpha-hydroxyisovalerate	Amino Acid	Leucine, Isoleucine and Valine Metabolism	33937	LC/MS Neg	100001300	1126	117.056	600-37-3	99823		HMDB00407	18272506	18031448	17308572	14953011	17699924	14399423	22098140	21328314	20971184	16908948
43	alpha-ketoglutaramate**	Amino Acid	Glutamate Metabolism	62101	LC/MS Polar	100002397	1916	144.03	18465-19-5				9387091	6.67863e+06	5971403	6269718	4112320	5977928	5796220	6765617	5553551	7073440
1107	alpha-ketoglutarate	Energy	TCA Cycle	528	LC/MS Polar	93	2700	145.014	305-72-6;328-50-7;22202-68-2	51	C00026	HMDB00208	928547456	902379968	894425408	794296576	764967424	640672320	975505664	501566560	765863104	499090048
2691	alpha-muricholate	Lipid	Primary Bile Acid Metabolism	34092	LC/MS Neg	100001280	4765	407.28	2393-58-0	3083761	C17647	HMDB00506	31273992	638096	5796987	1803371	291567	639179	194343	296547	552129	473019
3510	alpha-tocopherol	Cofactors and Vitamins	Tocopherol Metabolism	1561	LC/MS Pos Late	1105	2522	430.378	59-02-9;10191-41-0	14985	C02477	HMDB01893	52113056	67832296	54852088	66986500	51714368	52191192	42343156	56683520	71957632	51210664
3327	adenosine 5'-monophosphate (AMP)	Nucleotide	Purine Metabolism, Adenine containing	32342	LC/MS Pos Early	209	1013	348.07	149022-20-8	6083	C00020	HMDB00045	1162374	642278	1345792	2315429	2149824	973419	1501187	1438749	1414988	1802340
79	anserine	Amino Acid	Histidine Metabolism	15747	LC/MS Neg	100000044	1124.8	239.115	10030-52-1	112072	C01262	HMDB00194	3858236	2720362	5806979	2677018	2863513	5873275	2650618	3.50897e+06	2795791	2526067
221	anthranilate	Amino Acid	Tryptophan Metabolism	57746	LC/MS Pos Early	1258	2606	120.044	118-92-3	227	C00108	HMDB01123	783371	645100	524319	833564	452223	549422	512119	780357	853348	485540
950	arabinose	Carbohydrate	Pentose Metabolism	575	LC/MS Polar	828	1804.5	195.051	28697-53-2	66308	C00216	HMDB00646	2119813	1798919	1505578	3976655	1392847	2056037	1825783	1885939	1986637	3070473
965	arabitol/xylitol	Carbohydrate	Pentose Metabolism	48885	LC/MS Polar	100006430	1932.4	151.061		6912	C01904		1702355	1658679	2906174	5688545	1298071	1859966	2041154	1642971	10928570	1466282
967	arabonate/xylonate	Carbohydrate	Pentose Metabolism	48255	LC/MS Polar	100006115	2700	165.04					28520670	25838140	50108012	61764420	25455786	28209900	29308082	34815460	91933360	36417568
1178	arachidate (20:0)	Lipid	Long Chain Fatty Acid	1118	LC/MS Neg	893	6240	311.296	506-30-9	10467	C06425	HMDB02212	13165425	16423955	12362728	16728788	30011976	20575516	14493009	17885176	18526820	21958520
1210	arachidonate (20:4n6)	Lipid	Polyunsaturated Fatty Acid (n3 and n6)	1110	LC/MS Neg	229	5535	303.233	506-32-1	444899	C00219	HMDB01043	101072112	83879544	64574628	77267096	209291360	114573456	89365816	133917304	112516144	127400752
1429	arachidonoylcarnitine (C20:4)	Lipid	Fatty Acid Metabolism(Acyl Carnitine)	57518	LC/MS Pos Late	100015837	1353	448.342					1215903	1711433	513277	703150	1240184	661726	624608	490301	1347991	688036
1468	arachidonoylcholine	Lipid	Fatty Acid Metabolism (Acyl Choline)	53261	LC/MS Pos Late	100009332	1390	390.337					1466985	588200			540402	980376	545692	595514		817988
1428	arachidoylcarnitine (C20)*	Lipid	Fatty Acid Metabolism(Acyl Carnitine)	57513	LC/MS Pos Late	100015833	1512	456.405				HMDB06460	255561	439034	242981	230580	366440	414246	399585	384519	403998	364564
384	argininate*	Amino Acid	Urea cycle; Arginine and Proline Metabolism	57461	LC/MS Pos Early	100002769	2150	176.103	157-07-3	160437		HMDB03148	775312	2.01523e+06	1787540	2362475	811786	951039	1495547	1810670	2935706	1496656
353	arginine	Amino Acid	Urea cycle; Arginine and Proline Metabolism	1638	LC/MS Pos Early	231	2825	175.119	1119-34-2	232	C00062	HMDB00517	656920960	666689472	726112256	755446592	737762304	655752192	720413440	779028416	929680448	709614336
354	argininosuccinate	Amino Acid	Urea cycle; Arginine and Proline Metabolism	15497	LC/MS Pos Early	232	2745	291.13	156637-58-0	828	C03406	HMDB00052	280886	454989	459606	350994	248418	354181	387843	432867	405342	261480
38	asparagine	Amino Acid	Alanine and Aspartate Metabolism	512	LC/MS Pos Early	917	1225	133.061	70-47-3	6267	C00152	HMDB00168	152077056	63385372	80759472	70556624	71591752	73550408	81651408	75996336	89142184	63670744
34	aspartate	Amino Acid	Alanine and Aspartate Metabolism	443	LC/MS Pos Early	234	1165	134.045	56-84-8	5960	C00049	HMDB00191	11851271	3435108	8411600	4913783	5936555	6460370	6028373	4809269	5158680	4874315
1303	azelate (C9-DC)	Lipid	Fatty Acid, Dicarboxylate	18362	LC/MS Neg	2029	1276	187.098	123-99-9	2266	C08261	HMDB00784	559098	532430	373838	363710	382379	371780	502456	367140	282394	421208
2359	behenoyl dihydrosphingomyelin (d18:0/22:0)*	Lipid	Sphingolipid Metabolism	57331	LC/MS Pos Late	100009026	3150	789.684				HMDB12091	355824	681372	804551	743114	1022294	786910	1279001	780970	1279855	1146777
2362	behenoyl sphingomyelin (d18:1/22:0)*	Lipid	Sphingolipid Metabolism	48492	LC/MS Pos Late	100006294	3083	787.669				HMDB12103	71888192	142717920	205518976	152509776	225956528	167341568	311874048	221830048	235556720	235235904
1431	behenoylcarnitine (C22)*	Lipid	Fatty Acid Metabolism(Acyl Carnitine)	57514	LC/MS Pos Late	100015832	1561	484.436					117926	141895	119332	94422	235936	159013	197602	149784	192487	152825
3601	benzoate	Xenobiotics	Benzoate Metabolism	15778	LC/MS Neg	100000008	1750	121.029	65-85-0	243	C00180	HMDB01870	89973960	39747840	92597128	145951712	26570796	17937432	24959264	63739280	102226872	28044348
4674	benzoylcarnitine*	Xenobiotics	Chemical	43265	LC/MS Pos Early	100004555	3041	266.139	105450-08-6				153273	143451	548886	506110			214146	244941		204012
4067	benzyl alcohol glucuronide	Xenobiotics	Food Component/Plant	48781	LC/MS Neg	100006253	2222	283.082	5285-02-09	9795797			1657373	2480370	2125304	2274492	918929	1747781	2033909	4486371	3537015	1254512
268	beta-hydroxyisovalerate	Amino Acid	Leucine, Isoleucine and Valine Metabolism	12129	LC/MS Neg	1442	1027	117.056	625-08-1	69362		HMDB00754	1513198	1250200	2445633	2720543	1276182	1241081	1603489	1480864	3838901	961618
6	betaine	Amino Acid	Glycine, Serine and Threonine Metabolism	3141	LC/MS Pos Early	799	1064	118.086	107-43-7	247	C00719	HMDB00043	1686921088	605458560	954066880	1018604800	779582976	1055587456	869950784	907525248	1262354816	860498688
2690	beta-muricholate	Lipid	Primary Bile Acid Metabolism	31885	LC/MS Neg	100001066	4794	407.28	2393-59-1	5283853	C17726	HMDB00415	161214400	9099294	13530672	5362414	5032465	11380345	2671045	3088447	9460684	14084218
2519	beta-sitosterol	Lipid	Sterol	27414	LC/MS Pos Late	100001033	3054	397.383	83-46-5	222284	C01753	HMDB00852	88932	806226	455854	433943	923762	458663	556859	713066	726597	707738
3815	betonicine	Xenobiotics	Food Component/Plant	38100	LC/MS Pos Early	100002153	1012	160.097	515-25-3	164642	C08269	HMDB29412	467525	478512	369383	399208	402629	440824	398369	347935	425229	358922
3547	bilirubin (Z,Z)	Cofactors and Vitamins	Hemoglobin and Porphyrin Metabolism	43807	LC/MS Neg	1090	4796	583.256	635-65-4	5280352	C00486	HMDB00054	968817	613673	387621	372230	547329	525928	457465	428135	329759	651564
3548	bilirubin (E,E)*	Cofactors and Vitamins	Hemoglobin and Porphyrin Metabolism	32586	LC/MS Neg	100001950	4294	583.256	114-25-0	5315454			351127	97643	93208	89620	223512	215403	152058	143258	74704	186989
3549	bilirubin (E,Z or Z,E)*	Cofactors and Vitamins	Hemoglobin and Porphyrin Metabolism	47886	LC/MS Pos Late	100001951	1265	585.271		5799469		HMDB00488	146255	90234		103138	66544	85876	53789	66588	85766	107833
3550	biliverdin	Cofactors and Vitamins	Hemoglobin and Porphyrin Metabolism	2137	LC/MS Neg	250	4695.6	581.241	55482-27-4;55482-27-4	5353439	C00500	HMDB01008	158617	88189	44978	46008	114864	82904	64724	66210	51382	114168
1368	butyrylcarnitine (C4)	Lipid	Fatty Acid Metabolism (also BCAA Metabolism)	32412	LC/MS Pos Early	100001054	2860	232.154	25576-40-3	439829	C02862	HMDB02013	10116844	10288770	75437624	106713256	5607889	5280469	4.13559e+06	4104765	29213774	6722788
1369	butyrylglycine	Lipid	Fatty Acid Metabolism (also BCAA Metabolism)	31850	LC/MS Neg	100001151	1470	144.067	20208-73-5	88412		HMDB00808	786592	12568464	10607268	24135826	930054	2480777	2414045	2289507	14075138	1334497
3690	caffeic acid sulfate	Xenobiotics	Xanthine Metabolism	53254	LC/MS Polar	100009337	1307	258.992				HMDB41708	11905447	5710271	7941949	18379276	17390204	12742059	31999728	12552765	5665817	5085908
2521	campesterol	Lipid	Sterol	33997	LC/MS Pos Late	100001269	2873	383.367	474-62-4	173183	C01789	HMDB02869	624112	2969165	2449911	2.06102e+06	3960508	1464716	2035420	2858511	3242560	2680067
1144	caproate (6:0)	Lipid	Medium Chain Fatty Acid	32489	LC/MS Neg	926	2713.7	115.076	142-62-1	8892	C01585	HMDB00535	1159146	1152717	1.8641e+06	6381163	822656	1075577	1.19786e+06	1053560	3467142	1090158
55	carboxyethyl-GABA	Amino Acid	Glutamate Metabolism	40007	LC/MS Pos Early	100003260	2085	176.092	4386-03-02	2572		HMDB02201	404799	639736	623299	687123	365055	468581	450592	632538	1062065	602696
1452	carnitine	Lipid	Carnitine Metabolism	15500	LC/MS Pos Early	100000007	1978	162.112	461-05-2	10917	C00318	HMDB00062	640651648	465105216	378519936	366356224	479863616	582912576	497454592	436235936	413524896	541341120
76	carnosine	Amino Acid	Histidine Metabolism	1768	LC/MS Neg	249	804	225.099	305-84-0	439224	C00386	HMDB00033	948709	568909	1533813	797683	899293	1824854	885052	970415	834978	815245
3569	carotene diol (1)	Cofactors and Vitamins	Vitamin A Metabolism	57635	LC/MS Pos Late	100015966	1720	568.428					118555	76718	95197	76580	101859	171353	122609	83023	63033	136183
3619	catechol sulfate	Xenobiotics	Benzoate Metabolism	35320	LC/MS Neg	100001605	1906	188.986	4918-96-1	3083879		HMDB59724	46839700	56846492	47462580	49637296	17969610	40005156	40603088	40600568	37467172	46755340
2450	ceramide (d16:1/24:1, d18:1/22:1)*	Lipid	Ceramides	57437	LC/MS Pos Late	100015727	3850	620.598					2677971	5530129	5220064	3723985	3407373	2049940	3095927	3940942	5047859	3.93306e+06
2453	ceramide (d18:1/20:0, d16:1/22:0, d20:1/18:0)*	Lipid	Ceramides	57440	LC/MS Pos Late	100015755	3920	594.582					827601	2157735	2466798	1877159	1132948	936511	1708395	1867980	1968080	2003469
2454	ceramide (d18:2/24:1, d18:1/24:2)*	Lipid	Ceramides	57443	LC/MS Pos Late	100015744	3858	646.613					2468231	4551860	2635123	2751063	2547897	1344430	1816184	1732446	2806449	1971511
210	C-glycosyltryptophan	Amino Acid	Tryptophan Metabolism	48782	LC/MS Neg	100006379	1777	365.135	180509-18-6	10981970			172957	221852	211763	167191	183164	229413	261663	290477	191812	230459
2687	chenodeoxycholate	Lipid	Primary Bile Acid Metabolism	1563	LC/MS Neg	1123	5264	391.285	474-24-9;474-25-9	10133	C02528	HMDB00518	31961980	947654	1408957	1583473	801038	2274486	858503	942219	946359	1.41239e+06
1660	chiro-inositol	Lipid	Inositol Metabolism	37112	LC/MS Polar	100001859	3191.2	225.062	643-12-9		C19891	HMDB34220	2775040	3352867	2748810	3371988		3177212	2999068	2432930	2557758	2211377
2684	cholate	Lipid	Primary Bile Acid Metabolism	22842	LC/MS Neg	136	5165	407.28	81-25-4	221493	C00695	HMDB00619	454797440	9611258	59632272	24233364	4943087	6958745	3644464	6085359	9301424	7466606
2495	cholesterol	Lipid	Sterol	63	LC/MS Pos Late	266	2707	369.352	57-88-5	11025495	C00187	HMDB00067	160516240	190228032	186634000	170197120	197029056	141320736	172452928	175222528	180177872	193945088
1688	choline	Lipid	Phospholipid Metabolism	15506	LC/MS Pos Early	1256	1961	104.107	67-48-1	305	C00114	HMDB00097	320949280	274057504	301618176	324987200	222123632	211433920	224923552	249837280	552173696	212565376
3859	cinnamoylglycine	Xenobiotics	Food Component/Plant	38637	LC/MS Neg	100002253	3127	204.067	16534-24-0	709625		HMDB11621	20066038	43188088	50276936	64905332	18887414	25559772	38206980	43953500	63596228	25715432
1406	cis-4-decenoylcarnitine (C10:1)	Lipid	Fatty Acid Metabolism(Acyl Carnitine)	38178	LC/MS Pos Late	100002259	1057	314.233	98930-66-6				212214	261843	169226	180319	289853	198666	172482	122020	211886	162575
60	citramalate	Amino Acid	Glutamate Metabolism	22158	LC/MS Pos Early	100000998	1224	166.071	6236-10-08	1081	C00815	HMDB00426	260638	465344	375853	411973	336442	257024	217213	223279	603382	259322
1101	citrate	Energy	TCA Cycle	1564	LC/MS Neg	1124	582	191.02	77-92-9	311	C00158	HMDB00094	803472512	783095744	756205952	829043008	740373120	716390016	706494848	766216320	870270144	683432896
361	citrulline	Amino Acid	Urea cycle; Arginine and Proline Metabolism	2132	LC/MS Pos Early	391	1520	176.103	372-75-8	9750	C00327	HMDB00904	499060032	439254752	444853056	380469856	365536480	461273728	392189664	469038400	367400320	456066176
2589	corticosterone	Lipid	Corticosteroids	5983	LC/MS Neg	272	5040	345.207	50-22-6	5753	C02140	HMDB01547	4999649	3890824	2569735	1828464	2810292	2183435	1009676	1367614	1482100	3174248
388	creatine	Amino Acid	Creatine Metabolism	27718	LC/MS Pos Early	1221	1947	132.077	57-00-1	586	C00300	HMDB00064	972140096	850167424	982767488	899631104	1062273472	982864896	846961984	919521600	1203497600	692414144
389	creatinine	Amino Acid	Creatine Metabolism	513	LC/MS Pos Early	275	2055	114.066	60-27-5	588	C00791	HMDB00562	129728096	147325024	153748800	154003600	108219128	148508256	171098656	174764224	138620560	157503488
332	cystathionine	Amino Acid	Methionine, Cysteine, SAM and Taurine Metabolism	15705	LC/MS Pos Early	310	2270	223.075	535-34-2	439258	C02291	HMDB00099	2255673	1.92289e+06	2344189	2875647	1786374	2679611	2976151	3403386	2475585	3102884
334	cysteine	Amino Acid	Methionine, Cysteine, SAM and Taurine Metabolism	1868	LC/MS Pos Early	800	1488	122.027	52-90-4;56-89-3	5862	C00097	HMDB00574	1.87214e+06	1.38814e+06	2748748	2982046	1778905	2781265	2926824	3015649	9079298	2492619
339	cysteine s-sulfate	Amino Acid	Methionine, Cysteine, SAM and Taurine Metabolism	22176	LC/MS Pos Early	100000808	565	201.984	1637-71-4	115015	C05824	HMDB00731	7020877	3138149	2815051	2141047	1720837	2131192	2398409	3334590	1074463	1877329
420	cysteine-glutathione disulfide	Amino Acid	Glutathione Metabolism	35159	LC/MS Pos Early	100001437	2465	427.095	13081-14-6	4247235		HMDB00656	20365536	19121520	55244952	50968912	31123072	31499308	29167054	30196002	57803032	26922048
424	cysteinylglycine disulfide*	Amino Acid	Glutathione Metabolism	62103	LC/MS Pos Early	100002466	2547	298.053	70555-24-7			HMDB00709	599418	804805	1243425	961762	1039244	1177847	949068	1011681	1439099	914717
340	cystine	Amino Acid	Methionine, Cysteine, SAM and Taurine Metabolism	56	LC/MS Pos Early	279	2000	241.031	56-89-3	67678	C00491	HMDB00192	3315739	3028853	4503439	3123257	4294461	6086086	6365220	6457025	3329179	7373150
3431	cytidine	Nucleotide	Pyrimidine Metabolism, Cytidine containing	514	LC/MS Pos Early	827	2124	244.093	65-46-3	6175	C00475	HMDB00089	7615378	5936517	22703904	25260744	15423134	7.63609e+06	7826921	11486113	30012240	7.58169e+06
3432	cytosine	Nucleotide	Pyrimidine Metabolism, Cytidine containing	573	LC/MS Pos Early	881	2060	112.051	71-30-7	597	C00380	HMDB00630	2.80836e+06	3.75321e+06	5052575	6.44975e+06	1.67586e+06	764471	2809583	1349954	2714623	1647513
3876	daidzein	Xenobiotics	Food Component/Plant	32453	LC/MS Neg	100001219	3566	253.051	486-66-8	5281708	C10208	HMDB03312	2940468	2174402	2468067	3098245	1184406	1492958	1.90379e+06	1644948	2778703	752206
3877	daidzein glucuronide*	Xenobiotics	Food Component/Plant	62070	LC/MS Neg	100020206	2580	429.083					839170	686386	811522	900182	289676	402800	488751	501241	622109	223018
4069	daidzein sulfate (1)	Xenobiotics	Food Component/Plant	48727	LC/MS Neg	100006362	2843	333.007					960120	299138	285191	488676	94282	97722	165153	105786	714460	30920
4064	daidzein sulfate (2)	Xenobiotics	Food Component/Plant	48728	LC/MS Neg	100006363	3330	333.008					28036242	13412203	8933820	10149360	4800639	6160808	7524555	5785523	10381996	4545022
1403	decanoylcarnitine (C10)	Lipid	Fatty Acid Metabolism(Acyl Carnitine)	33941	LC/MS Pos Late	100001251	1130	316.248	1492-27-9	10245190		HMDB00651	157317	325526	541592	841057	193166	154997	151008	124916	790989	165271
1451	deoxycarnitine	Lipid	Carnitine Metabolism	36747	LC/MS Pos Early	100001662	2052	146.118	6249-56-5	134	C01181	HMDB01161	27553492	17036012	18641098	20449844	16638324	14640784	13896483	11302422	24971884	14004832
2703	deoxycholate	Lipid	Secondary Bile Acid Metabolism	1114	LC/MS Neg	302	5294	391.285	83-44-3	222528	C04483	HMDB00626	44582264	4944360	4288046	3530956	3600638	6000506	1789083	2736888	2621463	4938545
2266	diacylglycerol (16:1/18:2 [2], 16:0/18:3 [1])*	Lipid	Diacylglycerol	54966	LC/MS Pos Late	100010940	2733	608.525						536361	811894	1025017	472360	597407		353116	1174678	303755
1214	dihomo-linoleate (20:2n6)	Lipid	Polyunsaturated Fatty Acid (n3 and n6)	17805	LC/MS Neg	1231	5730	307.264	2091-39-6	6439848	C16525	HMDB05060	19652644	21414784	12770737	13829727	44107060	19754792	12668857	14945082	19107656	17009678
1209	dihomo-linolenate (20:3n3 or n6)	Lipid	Polyunsaturated Fatty Acid (n3 and n6)	35718	LC/MS Neg	100001739	5596	305.249	17046-59-2	5280581	C03242	HMDB02925	18493132	17003184	11033953	13380756	35186956	21021174	15072977	19833300	18785854	21509212
1432	dihomo-linolenoylcarnitine (20:3n3 or 6)*	Lipid	Fatty Acid Metabolism(Acyl Carnitine)	57521	LC/MS Pos Late	100015840	1392	450.358					395570	485378	141766	235233	319499	231409	170846	172603	356749	190732
1433	dihomo-linoleoylcarnitine (C20:2)*	Lipid	Fatty Acid Metabolism(Acyl Carnitine)	57520	LC/MS Pos Late	100015839	1436	452.373					92564	710768	145182	279191	224983	230713	169617	236670	646059
3532	dihydrobiopterin	Cofactors and Vitamins	Tetrahydrobiopterin Metabolism	35129	LC/MS Neg	100001506	1552.3	194.068	6779-87-9	1879	C00268	HMDB00038	73289	113140	120725	104040	78462	118616	145621	116219	109667	94779
3883	dihydroferulic acid	Xenobiotics	Food Component/Plant	40481	LC/MS Neg	100003432	1928	195.066	1135-23-5	14340			312065	274971	185528	135701	143294	109192	177720	70932	206147	117966
3388	dihydroorotate	Nucleotide	Pyrimidine Metabolism, Orotate containing	601	LC/MS Polar	923	1910	157.025	155-54-4	648	C00337	HMDB03349	2660350	3699452	2827211	2435610	1.94193e+06	2168404	1695450	1211940	2337577	1102644
4644	dimethyl sulfone	Xenobiotics	Chemical	43424	LC/MS Pos Early	100004284	832	95.0161	67-71-0	6213	C11142	HMDB04983	362805	470074	497976	593341		382632	485366	423429	500728	455053
367	dimethylarginine (SDMA + ADMA)	Amino Acid	Urea cycle; Arginine and Proline Metabolism	36808	LC/MS Pos Early	100001810	2850	203.15	102783-24-4	123831	C03626	HMDB01539	6196474	5872415	6054684	4950477	6693439	6.83826e+06	6823067	8824215	7.09228e+06	6862997
5	dimethylglycine	Amino Acid	Glycine, Serine and Threonine Metabolism	5086	LC/MS Pos Early	806	1104	104.071	1118-68-9	673	C01026	HMDB00092	30534580	37484200	36602876	38738272	23578840	35415504	40348636	42240008	38656528	34052544
1213	docosadienoate (22:2n6)	Lipid	Polyunsaturated Fatty Acid (n3 and n6)	32415	LC/MS Neg	100001182	6034	335.296	7370-49-2	5282807	C16533	HMDB61714	877967	832182	562740	643839	2463790	1.04571e+06	755326	755146	873564	677673
1200	docosahexaenoate (DHA; 22:6n3)	Lipid	Polyunsaturated Fatty Acid (n3 and n6)	44675	LC/MS Neg	100000665	5525	327.233	6217-54-5	445580	C06429	HMDB02183	51168128	48484628	38699008	51985468	139016592	72467920	43928760	63360572	68985800	78391800
1467	docosahexaenoylcholine	Lipid	Fatty Acid Metabolism (Acyl Choline)	53263	LC/MS Pos Late	100009333	1378	414.337					617286	263372			273618	470596	328879	329706		455765
1199	docosapentaenoate (n3 DPA; 22:5n3)	Lipid	Polyunsaturated Fatty Acid (n3 and n6)	32504	LC/MS Neg	100001181	5571	329.249	2234-74-4	6441454	C16513	HMDB06528	3798379	5761225	4494157	5746306	15397167	7.73881e+06	4723970	7371382	10115707	9313245
1212	docosapentaenoate (n6 DPA; 22:5n6)	Lipid	Polyunsaturated Fatty Acid (n3 and n6)	37478	LC/MS Neg	100001580	5624.5	329.249	25182-74-5	6441454	C16513	HMDB01976	10360270	9110829	5.76007e+06	6416324	25391568	8906599	6170015	9870633	8437629	10726322
1201	docosatrienoate (22:3n3)	Lipid	Polyunsaturated Fatty Acid (n3 and n6)	32417	LC/MS Neg	100001195	5823	333.28	59708-86-0	5312556	C16534	HMDB02823	434826				1241737	598856		202398	112657	344661
1217	docosatrienoate (22:3n6)*	Lipid	Polyunsaturated Fatty Acid (n3 and n6)	57467	LC/MS Neg	100015762	5850	333.28					780340	860645			2306270	583250		615589	1.16841e+06	896110
1308	dodecanedioate (C12-DC)	Lipid	Fatty Acid, Dicarboxylate	32388	LC/MS Neg	100001102	2990	229.145	693-23-2	12736	C02678	HMDB00623	274028			228260	165448	173315			227307	178980
4646	ectoine	Xenobiotics	Chemical	35651	LC/MS Pos Early	100001635	1980	143.082	96702-03-3	126041	C06231		4330128	4731168	6208347	5.87496e+06	4466412	5974941	6960578	6426903	5301246	5795635
4647	EDTA	Xenobiotics	Chemical	22163	LC/MS Neg	100001002	643	291.083	60-00-4	6049	C00284	HMDB15109	1875675776	1886644608	1987864064	2291680256	2364952576	1751768832	1889836160	1740590336	2309209600	2189400064
1316	eicosanodioate (C20-DC)	Lipid	Fatty Acid, Dicarboxylate	39831	LC/MS Neg	100002951	5200.9	341.27	2424-92-2	75502			356201	321517	194411	282244	413681	240810	183126	263635	288859	238478
1198	eicosapentaenoate (EPA; 20:5n3)	Lipid	Polyunsaturated Fatty Acid (n3 and n6)	18467	LC/MS Neg	2050	5450	301.217	10-2005-9;10417-94-4	446284	C06428	HMDB01999	3348469	4603129	3485883	4362388	10256614	5266596	4850755	5070616	7.36351e+06	7296689
1181	eicosenoate (20:1)	Lipid	Long Chain Fatty Acid	33587	LC/MS Neg	100001335	5950	309.28		5282768	C16526	HMDB02231	38899016	44432188	29202126	36646980	103266848	46327840	30053884	37126216	46532500	37798040
1434	eicosenoylcarnitine (C20:1)*	Lipid	Fatty Acid Metabolism(Acyl Carnitine)	57519	LC/MS Pos Late	100015838	1484	454.389					334328	945227	289418	522892	388943	418326	361071	465532	1083091	246901
3890	equol glucuronide	Xenobiotics	Food Component/Plant	41948	LC/MS Neg	100003895	3215	417.119					9196459	17247216	13665659	11736204	4125071	7.10998e+06	6817707	11470802	12412936	7664660
3891	equol sulfate	Xenobiotics	Food Component/Plant	40478	LC/MS Neg	100003429	3630	321.044					70358696	63472488	43578604	40263504	46682700	39185344	35206296	38058972	73602304	34889600
3892	ergothioneine	Xenobiotics	Food Component/Plant	37459	LC/MS Pos Early	100002154	850	230.096	58511-63-0	3032311	C05570	HMDB03045	10229135	2035408	9471052	6920527	12181206	10422240	6321339	8.1765e+06	21451044	15276709
1186	erucate (22:1n9)	Lipid	Long Chain Fatty Acid	1552	LC/MS Neg	1087	6355.6	337.311	112-86-7	5281116	C08316	HMDB02068	2476611	3385132	2323019	3657680	22286866	9582449	3.85435e+06	7633217	5447219	7307071
3894	erythritol	Xenobiotics	Food Component/Plant	20699	LC/MS Polar	100000846	1491	167.056	149-32-6	222285	C00503	HMDB02994	1475749	1750020	1794033	1460183	1374902	2.01519e+06	2360001	1969037	1.90431e+06	1.75236e+06
1094	erythronate*	Carbohydrate	Aminosugar Metabolism	42420	LC/MS Polar	100001320	2186	135.03	88759-55-1	2781043		HMDB00613	107272176	147345552	163417936	174555536	102818248	167752144	173439120	174510368	177903360	165507744
4586	ethyl glucuronide	Xenobiotics	Chemical	39603	LC/MS Neg	100002849	793	221.067	17685-04-0	152226		HMDB10325	3654534	3242830	4337466	3741138	2590561	2629906	3392273	3877995	5316284	4712810
297	ethylmalonate	Amino Acid	Leucine, Isoleucine and Valine Metabolism	15765	LC/MS Polar	2054	2785	131.035	601-75-2	11756		HMDB00622	14177048	18743556	23751192	36564644	8934642	15901035	17632780	18628260	24585500	16284570
3489	flavin adenine dinucleotide (FAD)	Cofactors and Vitamins	Riboflavin Metabolism	2134	LC/MS Neg	327	2425	784.15	146-14-5;84366-81-4	643975	C00016	HMDB01248	47214	106270	102919	87668	100359	94724	92138	99777	80933	80556
3896	ferulate	Xenobiotics	Food Component/Plant	35630	LC/MS Neg	100001542	1755	193.051	537-98-4	445858	C01494	HMDB00954	121201	63758	41179	37172	75477	52894	53518	27024
3897	ferulic acid 4-sulfate	Xenobiotics	Food Component/Plant	47114	LC/MS Neg	100005389	1200	273.007	86321-29-1	6305574		HMDB29200	2442655	2424506	2822421	2363530	1141018	1006843	1.88562e+06	1297865	2818923	823387
74	formiminoglutamate	Amino Acid	Histidine Metabolism	43493	LC/MS Pos Early	100002500	1880	175.071	816-90-0	439233	C00439	HMDB00854	1025426	1184204	1198814	1357862	1312926	2225221	1286117	1264554	927724	1396672
1018	fructose	Carbohydrate	Fructose, Mannose and Galactose Metabolism	577	LC/MS Polar	878	2065	179.056	57-48-7	5984	C00095	HMDB00660	40658736	61931880	30301590	23414924	62500764	50038436	45569608	47459924	14815102	75085360
1111	fumarate	Energy	TCA Cycle	1643	LC/MS Polar	330	3084	115.004	100-17-8	444972	C00122	HMDB00134	47157840	52307488	63150120	55740432	36888272	49701200	63411692	30793986	65723412	25454698
1034	galactitol (dulcitol)	Carbohydrate	Fructose, Mannose and Galactose Metabolism	1117	LC/MS Polar	1003	2360	181.072	608-66-2	11850	C01697	HMDB00107	698925	1.27199e+06	713160	411263	515697	759260	862491	814709	622932	707634
1043	galactonate	Carbohydrate	Fructose, Mannose and Galactose Metabolism	27719	LC/MS Polar	100001026	3085	195.051	299-28-5	128869	C00880	HMDB00565	17692428	16997824	19658608	14869821	12255387	18492534	21976252	17076036	10938003	21424384
446	gamma-glutamyl-alpha-lysine	Peptide	Gamma-glutamyl Amino Acid	55015	LC/MS Pos Early	100010901	2784	276.155		65254			2679444	2962237	3.18454e+06	3.65201e+06	4066108	5430524	4801545	4639545	3724445	3107917
455	gamma-glutamylcitrulline*	Peptide	Gamma-glutamyl Amino Acid	62104	LC/MS Pos Early	100020241	1644	305.146					3251783	3057137	2601980	2616363	2652323	4029253	2718126	3053322	2506061	2.99708e+06
447	gamma-glutamyl-epsilon-lysine	Peptide	Gamma-glutamyl Amino Acid	33934	LC/MS Pos Early	100001262	2717	276.155	17105-15-6	7015685		HMDB03869	605507	485908	483457	694247	460164	886139	767679	1181481	650083	971513
440	gamma-glutamylglutamate	Peptide	Gamma-glutamyl Amino Acid	36738	LC/MS Pos Early	331	1775	277.103	1116-22-9	92865	C05282	HMDB11737	1050440	509875	918079	867478	787910	989650	868527	709009	495525	659462
441	gamma-glutamylglutamine	Peptide	Gamma-glutamyl Amino Acid	2730	LC/MS Pos Early	1140	1430	276.119	10148-81-9	150914	C05283	HMDB11738	44469568	26646288	36422144	29469574	35215584	39372136	45547368	32962976	31192018	28348060
442	gamma-glutamylglycine	Peptide	Gamma-glutamyl Amino Acid	33949	LC/MS Pos Early	100001294	1535	205.082	1948-29-4	165527		HMDB11667	13456480	8196415	10162431	9574578	13342622	19353448	12872162	11501369	10812650	9544064
443	gamma-glutamylhistidine	Peptide	Gamma-glutamyl Amino Acid	18245	LC/MS Pos Early	1235	2740	285.119	37460-15-4	7017195			1353401	1371573	1312543	895834	1097659	2329632	1660979	1940114	1.01276e+06	996518
444	gamma-glutamylisoleucine*	Peptide	Gamma-glutamyl Amino Acid	34456	LC/MS Pos Early	100001485	2940	261.144		14253342		HMDB11170	549163	989089	1550055	1403351	1253214	2082611	875036	1481145	1181313	1107866
445	gamma-glutamylleucine	Peptide	Gamma-glutamyl Amino Acid	18369	LC/MS Pos Early	1268	2991	261.144	2566-39-4	151023		HMDB11171	1735406	2231928	3597771	3044439	4.14041e+06	4119565	1893438	3.50389e+06	3453222	2488882
448	gamma-glutamylmethionine	Peptide	Gamma-glutamyl Amino Acid	44872	LC/MS Pos Early	100001313	2640	279.101	17663-87-5	7009567		HMDB29155	4688606	3484409	4267529	4925318	5406299	4331842	4.03003e+06	3618451	4.06022e+06	2773905
449	gamma-glutamylphenylalanine	Peptide	Gamma-glutamyl Amino Acid	33422	LC/MS Pos Early	100000491	2992	295.129	7432-24-8	111299		HMDB00594	1954797	1675878	2040638	1771203	2371119	2696669	1062655	1989136	1675235	1736646
450	gamma-glutamylthreonine	Peptide	Gamma-glutamyl Amino Acid	33364	LC/MS Pos Early	100001314	1750	249.108	5652-48-2	76078708		HMDB29159	3871102	3944349	5104900	4806703	4500809	10000048	7442540	7083446	4418396	5742245
451	gamma-glutamyltryptophan	Peptide	Gamma-glutamyl Amino Acid	33947	LC/MS Neg	100001295	1960	332.125	66471-20-3	3989307		HMDB29160	605899	246451	187695	167852	273447	237196	265390	165890	153615	202700
452	gamma-glutamyltyrosine	Peptide	Gamma-glutamyl Amino Acid	2734	LC/MS Pos Early	1102	2518	311.124	7432-23-7	94340		HMDB11741	3299469	1753021	1684397	1.76577e+06	2403091	2698820	1.83034e+06	1766647	1707021	1326991
453	gamma-glutamylvaline	Peptide	Gamma-glutamyl Amino Acid	43829	LC/MS Pos Early	100001126	2700	247.129	2746-34-1	7015683		HMDB11172	4589369	4723747	5541249	5898412	5507795	8540831	6238402	6978252	6457355	5473247
3751	genistein	Xenobiotics	Food Component/Plant	32448	LC/MS Neg	100001221	3754	269.046	446-72-0	5280961	C06563	HMDB03217	1549553	860966	855083	990620	423280	562384	780130	586859	1192656	320699
3752	genistein glucuronide*	Xenobiotics	Food Component/Plant	62063	LC/MS Neg	100020216	2895	445.078					1167019	719683	1.04851e+06	811287	304968	404315	440947	468709	657370	229949
3879	genistein sulfate*	Xenobiotics	Food Component/Plant	62061	LC/MS Neg	100020207	3616	349.002					11680197	4241724	3589328	3608803	2071318	2468004	3005972	2.0126e+06	4438493	1.88861e+06
3819	gluconate	Xenobiotics	Food Component/Plant	587	LC/MS Polar	338	2922	195.051	527-07-1	10690	C00257	HMDB00625	16194455	24090266	35157396	30891820	17461742	27279998	36386432	22135076	35848624	21617496
908	glucose	Carbohydrate	Glycolysis, Gluconeogenesis, and Pyruvate Metabolism	20488	LC/MS Polar	572	2342	179.056	50-99-7	79025	C00031	HMDB00122	1341007616	2391173888	3472587520	3488725760	2144241536	1994739968	2237255936	2045506944	4065325312	2187884288
1071	glucuronate	Carbohydrate	Aminosugar Metabolism	15443	LC/MS Polar	100000257	3233.3	193.035	207300-70-7	444791	C00191	HMDB00127	25107666	30074928	28425810	29672328	17687144	41019368	34032576	39447636	19813290	30388388
41	glutamate	Amino Acid	Glutamate Metabolism	57	LC/MS Pos Early	561	1500	148.06	56-86-0	611	C00025	HMDB00148	311700288	117339120	217508448	136782064	165298464	122465280	143480352	128777400	138397936	114021760
50	glutamate, gamma-methyl ester	Amino Acid	Glutamate Metabolism	33487	LC/MS Pos Early	100001103	2170	162.076	1499-55-4;1499-55-4	68662		HMDB61715	912290	892676	1317113	1283773	927127	1069447	1030514	826579	1389409	1008499
42	glutamine	Amino Acid	Glutamate Metabolism	53	LC/MS Pos Early	563	1291	147.076	56-85-9	5961	C00064	HMDB00641	3148851968	2663874560	3670389760	3492154880	2439403520	2776361984	3226854912	3197301248	3761474304	2632225280
1284	glutarate (C5-DC)	Lipid	Fatty Acid, Dicarboxylate	396	LC/MS Polar	339	2900	131.035	110-94-1	743	C00489	HMDB00661	4474651	6290820	10110622	10157305	2554874	2815922	4540724	2430267	8.01978e+06	2404751
418	glutathione, oxidized (GSSG)	Amino Acid	Glutathione Metabolism	38783	LC/MS Pos Early	448	2667	307.083	103239-24-3	65359	C00127	HMDB03337	1142343	1144881	3.56624e+06	4505050	1626287	1541498	1638966	1228527	7371354	941354
928	glycerate	Carbohydrate	Glycolysis, Gluconeogenesis, and Pyruvate Metabolism	1572	LC/MS Polar	1052	2070.4	105.019	600-19-1	752	C00258	HMDB00139	39664056	40499544	46057252	37530204	36649896	47582808	52838868	38861652	31171568	44777952
2228	glycerol	Lipid	Glycerolipid Metabolism	15122	LC/MS Neg	1254	758	91.0401	56-81-5	753	C00116	HMDB00131	16734495	18158584	39991048	65633200	16135066	14448873	12124556	8.36936e+06	157155184	10189087
2229	glycerol 3-phosphate	Lipid	Glycerolipid Metabolism	43847	LC/MS Pos Early	100000258	580	173.021	29849-82-9	754	C00093	HMDB00126	2779419	3328607	7341348	8494055	2847385	3761415	3455598	4328656	18459860	4689168
1696	glycerophosphoethanolamine	Lipid	Phospholipid Metabolism	37455	LC/MS Polar	100001620	3075	214.049	33049-08-0	123874	C01233	HMDB00114	2521689	2095164	1455414	963511	2353696	1989916	1.77033e+06	1080913	697742	1634960
2234	glycerophosphoglycerol	Lipid	Glycerolipid Metabolism	48857	LC/MS Polar	100001619	2430	245.043		439964	C03274		2489008	3015182	4316953	2815884	2487995	1982001	3.58863e+06	1484956	4092355	2020755
1692	glycerophosphorylcholine (GPC)	Lipid	Phospholipid Metabolism	15990	LC/MS Pos Early	100000269	672	258.11	28319-77-9	71920	C00670	HMDB00086	104588152	133474928	83556576	72076224	154140416	115682104	69015984	101289352	64060480	106849752
1	glycine	Amino Acid	Glycine, Serine and Threonine Metabolism	58	LC/MS Pos Early	340	1375	76.0393	56-40-6	750	C00037	HMDB00123	110654576	73308168	70385152	82575792	108904616	112263088	88107368	82013888	116664744	83532472
2696	glyco-beta-muricholate**	Lipid	Primary Bile Acid Metabolism	62066	LC/MS Neg	100020214	4762	464.302					304556
2685	glycocholate	Lipid	Primary Bile Acid Metabolism	18476	LC/MS Neg	342	5163	464.302	475-31-0;863-57-0	10140	C01921	HMDB00138	745271					41395			29825	40040
4651	glycolate (hydroxyacetate)	Xenobiotics	Chemical	15737	LC/MS Polar	203	1790.4	159.011	79-14-1	757	C00160	HMDB00115	4012269	2412972	3064124	4719664	2670870	4107311	4049965	2988745	2275262	4295452
2470	glycosyl ceramide (d18:1/20:0, d16:1/22:0)*	Lipid	Ceramides	57595	LC/MS Pos Late	100015882	3414	756.635					2083021	6490392	4566670	4250360	3200226	1750363	3919831	4024770	5.43727e+06	5857528
2471	glycosyl ceramide (d18:1/23:1, d17:1/24:1)*	Lipid	Ceramides	57448	LC/MS Pos Late	100015751	3667	796.666					1.92658e+06	3.00237e+06	1.22171e+06	1714602	1.7709e+06	880452	1.1916e+06	1.37149e+06	2313443	1.49452e+06
2472	glycosyl ceramide (d18:2/24:1, d18:1/24:2)*	Lipid	Ceramides	57453	LC/MS Pos Late	100015745	3380	808.666					2680342	5444861	2309204	2730201	2824063	1334135	2098106	1926065	3362103	2583924
2459	glycosyl-N-behenoyl-sphingadienine (d18:2/22:0)*	Lipid	Ceramides	57421	LC/MS Pos Late	100015625	3420	782.65					2105211	6210405	3410118	3159380	4412876	1715483	3.84168e+06	3.17975e+06	7.50076e+06	4607200
2464	glycosyl-N-erucoyl-sphingosine (d18:1/22:1)*	Lipid	Ceramides	57455	LC/MS Pos Late	100015728	3373	782.65					5811748	13979877	7.86189e+06	8018269	6980856	3731028	5653723	7.35477e+06	11574247	8381549
2455	glycosyl-N-palmitoyl-sphingosine (d18:1/16:0)	Lipid	Ceramides	53013	LC/MS Pos Late	100009272	2623	700.572					4470100	16835540	4532172	9781998	3.72962e+06	2398129	3583343	3.92461e+06	9779096	4127424
2456	glycosyl-N-stearoyl-sphingosine (d18:1/18:0)	Lipid	Ceramides	52234	LC/MS Pos Late	100001882	3053	728.604					808571	1997986	1175733	1300468	832230	419403	710410	866591	1076666	1511364
607	glycylvaline	Peptide	Dipeptide	18357	LC/MS Pos Early	100000487	2734	175.108	1963-21-9	97417		HMDB28854	154060	158889	147935	202740	91280	106490	86226	119083	133071
3621	guaiacol sulfate	Xenobiotics	Benzoate Metabolism	46111	LC/MS Neg	100004208	2344	203.002		22473		HMDB60013	852698	452208	284186	298772	94571	312643	377234	453781	168114	247229
387	guanidinoacetate	Amino Acid	Creatine Metabolism	43802	LC/MS Polar	344	2884	116.047	352-97-6	763	C00581	HMDB00128	305207	159570	281645	215215	192923	149740	81407	81241	237676	105619
3508	gulonate*	Cofactors and Vitamins	Ascorbate and Aldarate Metabolism	46957	LC/MS Polar	100001586	2750	195.051	20246-53-1	9794176	C00257	HMDB03290	86848232	151935088	360228640	413590528	117510984	319415840	272807840	274165184	711792512	173773600
3546	heme	Cofactors and Vitamins	Hemoglobin and Porphyrin Metabolism	41754	LC/MS Pos Late	100001386	1124	616.176	14875-96-8	26945	C00032	HMDB03178	7384707	5329870	2020418	3501258	7709622	2271853	3234657	3522892	1307974	4469241
4654	HEPES	Xenobiotics	Chemical	21248	LC/MS Neg	100000843	1022	237.091	7365-45-9	23831			2212139	723438	1155447	507366	82660	599610	667777	909983	1318243	3049593
1384	heptanoyl glycine	Lipid	Fatty Acid Metabolism(Acyl Glycine)	42629	LC/MS Neg	100004195	3720	186.114	23783-23-5	10932172				133318	395841	398636			20836		801897
1193	hexadecadienoate (16:2n6)	Lipid	Polyunsaturated Fatty Acid (n3 and n6)	57652	LC/MS Neg	100009394	5398	251.202	28290-73-5			HMDB00477	1247674	1409099	1534740	1318368	3759300	2646748	1245494	1145566	1.91536e+06	1819442
1310	hexadecanedioate (C16-DC)	Lipid	Fatty Acid, Dicarboxylate	35678	LC/MS Neg	100001614	4615	285.207	505-54-4	10459	C19615	HMDB00672	693478	428638	512186	767912	389926	304883	239275	213306	857734	280167
1194	hexadecatrienoate (16:3n3)	Lipid	Polyunsaturated Fatty Acid (n3 and n6)	57651	LC/MS Neg	100009393	5330	249.186	7561-64-0	5312428			79650.3	104960	74830	82612	186953	141796	76457.3	83019	75647.9	96720
1312	hexadecenedioate (C16:1-DC)*	Lipid	Fatty Acid, Dicarboxylate	61862	LC/MS Neg	100019975	4380	283.191					511340	181848	390577	539210	293028	170920	120611	112609	634020	141096
1400	hexanoylcarnitine (C6)	Lipid	Fatty Acid Metabolism(Acyl Carnitine)	32328	LC/MS Pos Late	100000781	800	260.186	6920-35-0	6426853		HMDB00705	773848	1540747	26267714	49004352	467266	378244	516697	345976	20680228	473668
1382	hexanoylglycine	Lipid	Fatty Acid Metabolism(Acyl Glycine)	35436	LC/MS Neg	100001527	2900	172.098	24003-67-6	99463		HMDB00701	523947	3668034	6533426	10730236	1280787	1648921	1076024	631045	8161138	914357
3589	hippurate	Xenobiotics	Benzoate Metabolism	15753	LC/MS Neg	100000014	2106.9	178.051	495-69-2	464	C01586	HMDB00714	840493504	1136369408	1696589184	1755925376	385919136	612073280	968187008	1824826496	1442808064	1088419840
80	histamine	Amino Acid	Histidine Metabolism	1574	LC/MS Pos Early	354	3035	112.087	51-45-6	774	C00388	HMDB00870	583160	342591		85335	328546	291343	249553	304115		296523
64	histidine	Amino Acid	Histidine Metabolism	59	LC/MS Neg	355	755.9	154.062	5934-29-2	6274	C00135	HMDB00177	67691128	43188984	41895252	37509812	50553156	51485628	54849252	51743428	38548376	53617968
362	homoarginine	Amino Acid	Urea cycle; Arginine and Proline Metabolism	22137	LC/MS Pos Early	100000961	2882	189.135	156-86-5	9085	C01924	HMDB00670	254993	588944	383636		616663	925368	634003	929752	810988	779712
363	homocitrulline	Amino Acid	Urea cycle; Arginine and Proline Metabolism	22138	LC/MS Pos Early	100000963	1908	190.119	1190-49-4	65072	C02427	HMDB00679	231052	287377	330805	207084	486772	412440	397168	401339	239521	393966
21	homoserine	Amino Acid	Glycine, Serine and Threonine Metabolism	18351	LC/MS Polar	100000458	2875.8	118.051	672-15-1	12647	C00263	HMDB00719	1575493	3124432	786085	561779	2990575	1737276	2507595	3420432	1994976	3249063
3918	homostachydrine*	Xenobiotics	Food Component/Plant	33009	LC/MS Pos Early	100001550	1750	158.118	1195-94-4	441447	C08283	HMDB33433	17580516	6862549	7.60446e+06	8501627	9842461	9561838	6466652	6124746	8909300	8367212
177	homovanillate sulfate	Amino Acid	Tyrosine Metabolism	38349	LC/MS Neg	100002250	1047	261.007	38339-06-9	29981063		HMDB11719	206193	335313	333072	241407	126169	287431	348623	381886	169949	424509
70	hydantoin-5-propionic acid	Amino Acid	Histidine Metabolism	40473	LC/MS Polar	100002514	2080	171.041	5624-26-0	782	C05565	HMDB01212	727218	555967	705171	808738	342526	611745	561237	521372	357103	514405
4515	hydroquinone sulfate	Xenobiotics	Drug - Topical Agents	35322	LC/MS Neg	100001604	1395	188.986	123-31-9	161220	C00530	HMDB02434	163728	163747	118127	139285		149087	162344	153219	81079	139415
40	hydroxyasparagine**	Amino Acid	Alanine and Aspartate Metabolism	62060	LC/MS Pos Early	100020205	1149	149.056					337558	589167	541676	505430	455613	526261	619343	697484	572801	647011
376	trans-4-hydroxyproline	Amino Acid	Urea cycle; Arginine and Proline Metabolism	32306	LC/MS Pos Early	1001	1064	132.066	51-35-4	5810	C01157	HMDB00725	21258116	28441184	30093104	27503008	24623602	30343868	36698756	37617140	27747676	31906520
2724	hyocholate	Lipid	Secondary Bile Acid Metabolism	34093	LC/MS Neg	100001279	5046	407.28	547-75-1	92805	C17649	HMDB00760	952253	32795	99714		105003	156017	91350	42826	90836	133606
2727	hyodeoxycholate	Lipid	Secondary Bile Acid Metabolism	27531	LC/MS Neg	100000777	5097	391.285	83-49-8	5283820	C15517	HMDB00733	7914696	803117	493704	467091	560594	1367772	312370	279630		1547732
345	hypotaurine	Amino Acid	Methionine, Cysteine, SAM and Taurine Metabolism	590	LC/MS Polar	358	2763.4	108.012	300-84-5	107812	C00519	HMDB00965	2490650	364474	1127689	1345434	768530	1089239	979535	643257	1574485	438305
3311	hypoxanthine	Nucleotide	Purine Metabolism, (Hypo)Xanthine/Inosine containing	3127	LC/MS Neg	171	1291.2	135.031	68-94-0	790	C00262	HMDB00157			17300378	15408429					34164208
75	imidazole lactate	Amino Acid	Histidine Metabolism	15716	LC/MS Pos Early	100000263	2040	157.061	14403-45-3	440129	C05568	HMDB02320	2724858	4275055	5165417	5036964	5.07629e+06	4622252	5134495	5485872	6432865	4355430
73	imidazole propionate	Amino Acid	Histidine Metabolism	40730	LC/MS Pos Early	100003434	2263	141.066	1074-59-5	70630		HMDB02271	1118198	1791625	4143639	2.04196e+06	1331962	2641520	1338496	1148862	4286631	1612332
4655	iminodiacetate (IDA)	Xenobiotics	Chemical	21025	LC/MS Pos Early	100000900	808	134.045	142-73-4	8897	C19911	HMDB11753	86171864	88601648	102935928	118348080	121825736	84075168	98174016	83255400	123773016	99352600
242	indole-3-carboxylic acid	Amino Acid	Tryptophan Metabolism	38116	LC/MS Neg	100002185	1710	160.04	771-50-6	69867	C19837	HMDB03320	76072	128428	30888	43430	61858	132590	56379	59460	103725	73877
235	indoleacetate	Amino Acid	Tryptophan Metabolism	27513	LC/MS Neg	100001034	2200	174.056	6505-45-9	802	C00954	HMDB00197	859435	579823	488580	553782	186259	313675	418095	310881	873736	476146
244	indoleacetylglycine	Amino Acid	Tryptophan Metabolism	54730	LC/MS Neg	100006730	2610	231.078		446640			1498643	2252540	2043806	1815627	745177	2646944	3070023	2108768	2591235	3596334
3921	indoleacrylate	Xenobiotics	Food Component/Plant	22114	LC/MS Neg	100000800	2511	186.056	1204-06-4	15030923		HMDB00734	2415053	2284786	2249935	1709098	581111	598761	2194407	2075735	1826444	1422627
234	indolelactate	Amino Acid	Tryptophan Metabolism	18349	LC/MS Pos Early	100000463	2600	206.081	832-97-3	92904	C02043	HMDB00671	9143101	8999310	10597284	11419757	3984826	6163234	9342697	10391776	8816555	7360649
237	indolepropionate	Amino Acid	Tryptophan Metabolism	32405	LC/MS Pos Early	100001083	3205	190.086	830-96-6	3744		HMDB02302	16324627	27679048	17721028	29157902	8040324	10992015	19842196	15086575	35092084	16701028
238	indolepropionylglycine	Amino Acid	Tryptophan Metabolism	54917	LC/MS Neg	100010863	2926	245.093		7677842			390635	711582	709949	301724	476931	409560	981724	678145	555461	402709
3922	indolin-2-one	Xenobiotics	Food Component/Plant	43374	LC/MS Pos Early	100004318	2575	134.06	59-48-3	321710	C12312		1264334	1351578	1087975	1327984	367579	381873	709164	1194529	247774	383575
189	indoxyl glucuronide	Amino Acid	Tyrosine Metabolism	52749	LC/MS Neg	100008931	1940	308.078	35804-66-1	2733785		HMDB59804	1232247	737949	716107	571870	416798	924056	1264107	1.92634e+06	428486	978469
3310	inosine	Nucleotide	Purine Metabolism, (Hypo)Xanthine/Inosine containing	1123	LC/MS Neg	361	1602.1	267.073	58-63-9	6021	C00294	HMDB00195	33842		3295902	3190006	50576	39281	20644	58874	9243868
310	isobutyrylcarnitine (C4)	Amino Acid	Leucine, Isoleucine and Valine Metabolism	33441	LC/MS Pos Early	100001055	2810	232.154	25518-49-4	168379		HMDB00736	5880357	15100817	18141560	18398158	2603045	3366067	11054953	5366922	16106853	2204214
311	isobutyrylglycine	Amino Acid	Leucine, Isoleucine and Valine Metabolism	35437	LC/MS Neg	100001590	1420	144.067	15926-18-8	10855600		HMDB00730	77758	271365	146736	84320.1	147976	184935	365706	254605	145385	133510
1379	isocaproylglycine	Lipid	Fatty Acid Metabolism(Acyl Glycine)	61789	LC/MS Neg	100019816	2820	172.098					206313	3688557	2139842	2.03751e+06	233576	378903	1.30253e+06	475328	3.21646e+06	185141
1106	isocitric lactone	Energy	TCA Cycle	54724	LC/MS Polar	100009239	2970	173.009	4702-32-3	98259			15859079	14545433	22405724	18813826	12317834	22249038	20943952	21824182	14573011	18961918
284	isoleucine	Amino Acid	Leucine, Isoleucine and Valine Metabolism	1125	LC/MS Pos Early	376	2800	132.102	73-32-5	6306	C00407	HMDB00172	575279040	555593280	569892544	548114624	602511488	443094688	429107072	423318880	674380096	479971840
2716	isoursodeoxycholate	Lipid	Secondary Bile Acid Metabolism	57577	LC/MS Neg	100002488	4809	391.285	78919-26-3	127601	C17662	HMDB00686	2185561	250236	237574	142521	64755	231788	53597	65984	181800	204940
259	isovalerate (i5:0)	Amino Acid	Leucine, Isoleucine and Valine Metabolism	44656	LC/MS Neg	100000708	1564	101.061	503-74-2	10430	C08262	HMDB00718	1498663	456293	1224792	1481390	347708	207643			1605088
261	isovalerylcarnitine (C5)	Amino Acid	Leucine, Isoleucine and Valine Metabolism	34407	LC/MS Pos Early	100001393	3085	246.17	31023-24-2	6426851		HMDB00688	2158162	1.88582e+06			1111294	808983	455525	724737		698768
260	isovalerylglycine	Amino Acid	Leucine, Isoleucine and Valine Metabolism	35107	LC/MS Neg	100001452	1950	158.082	16284-60-9	546304		HMDB00678	1116357	6432236	3298710	3175299	3402511	6110690	5674189	6126914	3939662	3200626
218	kynurenate	Amino Acid	Tryptophan Metabolism	1417	LC/MS Neg	98	2224	188.035	492-27-3	3845	C01717	HMDB00715	2831271	2766476	2599338	3.00463e+06	541384	1396142	3042512	3331492	2909684	1.90856e+06
214	kynurenine	Amino Acid	Tryptophan Metabolism	15140	LC/MS Pos Early	100000265	2739	209.092	2922-83-0	161166	C00328	HMDB00684	7743886	10660541	6572552	6694224	7592230	7741433	8484152	10711861	7674904	8312935
925	lactate	Carbohydrate	Glycolysis, Gluconeogenesis, and Pyruvate Metabolism	527	LC/MS Polar	482	1468.8	89.0244	79-33-4	612	C00186	HMDB00190	1787005824	2066161280	3152837632	3160875008	2172649984	984174848	961201536	1230296064	3658259968	831501824
1151	laurate (12:0)	Lipid	Medium Chain Fatty Acid	1645	LC/MS Neg	181	5300	199.17	143-07-7	3893	C02679	HMDB00638	10159858	9450372	7673766	8961446	11840285	6493132	6725629	6575485	6725749	6161608
1407	laurylcarnitine (C12)	Lipid	Fatty Acid Metabolism(Acyl Carnitine)	34534	LC/MS Pos Late	100001392	1235	344.28	25518-54-1	10427569		HMDB02250	792985	672229	464810	587346	434879	348326	402778	313062	987320	404052
250	leucine	Amino Acid	Leucine, Isoleucine and Valine Metabolism	60	LC/MS Pos Early	397	2864	132.102	61-90-5	6106	C00123	HMDB00687	490678944	481468032	524316960	521196224	556715904	358084288	373742528	401416352	699877632	397999712
2364	lignoceroyl sphingomyelin (d18:1/24:0)	Lipid	Sphingolipid Metabolism	57330	LC/MS Pos Late	100006298	3437	815.7	60037-60-7				22258368	58983952	39909576	50002384	52339824	36874268	50243992	38245628	67751496	44813116
1441	lignoceroylcarnitine (C24)*	Lipid	Fatty Acid Metabolism(Acyl Carnitine)	57515	LC/MS Pos Late	100015834	1603	512.467					274568	326680	247219	268867	389294	289142	340136	310039	337618	308928
1205	linoleate (18:2n6)	Lipid	Polyunsaturated Fatty Acid (n3 and n6)	1105	LC/MS Neg	180	5535	279.233	60-33-3	5280450	C01595	HMDB00673	431055744	450376064	289612608	426330080	1020780224	558493376	346666048	356592256	446525728	401776832
1207	linolenate [alpha or gamma; (18:3n3 or 6)]	Lipid	Polyunsaturated Fatty Acid (n3 and n6)	34035	LC/MS Neg	100001337	5450	277.217		5280934	C06426	HMDB03073	16328282	22953354	17113234	23704788	62713608	36783068	20597008	17725420	24435484	23242356
1414	linolenoylcarnitine (C18:3)*	Lipid	Fatty Acid Metabolism(Acyl Carnitine)	57511	LC/MS Pos Late	100015831	1310	422.326					360830	383122	165675	126319	273325	148284	164784	77601	346515	148130
1644	linoleoyl ethanolamide	Lipid	Endocannabinoid	52608	LC/MS Neg	100006726	6150	322.275	68171-52-8	5283446		HMDB12252	742602	712738	487563	639867	660679	554111	408694	586506	791104	710280
2317	linoleoyl-arachidonoyl-glycerol (18:2/20:4) [1]*	Lipid	Diacylglycerol	54955	LC/MS Pos Late	100010922	2566	658.541				HMDB07257	90415	343914	356617	643279	431929	375592	405824	197665	560310	227512
2318	linoleoyl-arachidonoyl-glycerol (18:2/20:4) [2]*	Lipid	Diacylglycerol	54956	LC/MS Pos Late	100010923	2624	658.541				HMDB07257	212085		1.04691e+06	300564	1107868	727253	1.31453e+06	914575	386060	763067
1413	linoleoylcarnitine (C18:2)*	Lipid	Fatty Acid Metabolism(Acyl Carnitine)	46223	LC/MS Pos Late	100003151	1430	424.342	36816-10-1	6450015		HMDB06469	2877723	4763300	1639760	2443312	2855887	1524795	1947493	1587951	5350126	1989009
1464	linoleoylcholine*	Lipid	Fatty Acid Metabolism (Acyl Choline)	57463	LC/MS Pos Late	100015760	1388	366.337					3888356	1501945	65790		990820	2317615	1056044	942600		1417555
2307	linoleoyl-linoleoyl-glycerol (18:2/18:2) [1]*	Lipid	Diacylglycerol	54968	LC/MS Pos Late	100010941	2689	634.541				HMDB07248	730097	889693	1933347	2702644	2143982	3128382	2945157	1507258	1227799	1724370
2708	lithocholate	Lipid	Secondary Bile Acid Metabolism	1483	LC/MS Neg	405	5372	375.29	434-13-9	9903	C03990	HMDB00761	1276911
90	lysine	Amino Acid	Lysine Metabolism	1301	LC/MS Pos Early	407	2850	147.113	56-87-1	5962	C00047	HMDB00182	731957312	836095232	858252288	927072576	937065088	923310720	926327744	940748224	1144800768	870035264
1112	malate	Energy	TCA Cycle	1303	LC/MS Neg	409	615.6	133.014	6915-15-7	525	C00149	HMDB00156	286737760	322667584	374183744	333720384	235214992	289874976	332065664	235213904	410606240	155390560
1296	maleate	Lipid	Fatty Acid, Dicarboxylate	20676	LC/MS Polar	100000707	2640	115.004	110-16-7	444266	C01384	HMDB00176	1755852	2671452	4440228	3537220	3120181	2028452	2714762	2582248	4028548	2372950
1129	malonate	Lipid	Fatty Acid Synthesis	15872	LC/MS Polar	818	3447	103.004	141-82-2;26522-22-85-0	867	C00383	HMDB00691	25549880	33856604	31074558	35885292	18598864	32109166	32172146	33045372	22869780	36836460
1128	malonylcarnitine	Lipid	Fatty Acid Synthesis	37059	LC/MS Pos Early	100001526	2086	248.113	853728-01-5	22833583		HMDB02095	120182	184244	135827	175359	133650	170920	137547	196242	163453	144638
1023	mannitol/sorbitol	Carbohydrate	Fructose, Mannose and Galactose Metabolism	46142	LC/MS Polar	100001740	2320	181.072		5780	C00794	HMDB00247	15145263	36348860	20423970	14618297	15336760	13232870	15325734	15413904	26088000	15732564
1024	mannose	Carbohydrate	Fructose, Mannose and Galactose Metabolism	584	LC/MS Polar	803	2200	179.056	3458-28-4	18950	C00159	HMDB00169	14851545	22056248	22393250	23983676	19740584	23444492	26039662	21352336	26886366	25663730
1162	margarate (17:0)	Lipid	Long Chain Fatty Acid	1121	LC/MS Neg	891	5731	269.249	506-12-7	10465		HMDB02259	21609792	24224282	15779052	16846808	37112336	25133678	19545256	18915540	19652088	21714480
1442	margaroylcarnitine (C17)*	Lipid	Fatty Acid Metabolism(Acyl Carnitine)	57512	LC/MS Pos Late	100004054	1424	414.358	106182-29-0			HMDB06210	286150	603558	310906	336513	449528	414312	397906	455914	585580	410281
1216	mead acid (20:3n9)	Lipid	Polyunsaturated Fatty Acid (n3 and n6)	35174	LC/MS Neg	100001472	5650	305.249	20590-32-3	5312531		HMDB10378	8941247	8245075	5.96391e+06	6780607	16550982	8425235	5593140	9251608	11473247	10538090
316	methionine	Amino Acid	Methionine, Cysteine, SAM and Taurine Metabolism	1302	LC/MS Pos Early	415	2526	150.058	63-68-3	6137	C00073	HMDB00696	980869376	821054528	821945280	1012487616	963984320	749239744	753844224	721933696	823006272	642686656
320	methionine sulfone	Amino Acid	Methionine, Cysteine, SAM and Taurine Metabolism	44878	LC/MS Pos Early	100004635	1250	182.048	820-10-0	69961			211842	119491	99383	102948	195084	142606	125790	105181	95211	120701
321	methionine sulfoxide	Amino Acid	Methionine, Cysteine, SAM and Taurine Metabolism	18374	LC/MS Pos Early	100000039	1272	166.053	3226-65-1	158980	C02989	HMDB02005	22024188	20285234	19087348	23359152	22246298	17623438	23072554	20377424	17021826	16223643
4034	methyl glucopyranoside (alpha + beta)	Xenobiotics	Food Component/Plant	46144	LC/MS Neg	100005864	1070	193.072					5096442	5576871	4576858	3803476	4921232	4358475	4379681	5156194	4490098	5107634
3649	methyl-4-hydroxybenzoate sulfate	Xenobiotics	Benzoate Metabolism	48429	LC/MS Neg	100006116	2873	230.997					56290	63342	55977	55743	25419	80285	84647	72327	45288	80016
1374	methylmalonate (MMA)	Lipid	Fatty Acid Metabolism (also BCAA Metabolism)	1496	LC/MS Polar	418	3078.4	117.019	516-05-2	487	C02170	HMDB00202	14586282	14934992	14502893	12762742	10250281	18141684	16578533	11950423	22720648	13678162
298	methylsuccinate	Amino Acid	Leucine, Isoleucine and Valine Metabolism	15745	LC/MS Polar	2051	2800	131.035	498-21-5	10349		HMDB01844	2730968	4800118	7173534	9875937	2.03838e+06	2981902	4275595	2391113	7.9927e+06	1877159
2481	mevalonate	Lipid	Mevalonate Metabolism	39583	LC/MS Polar	30	1462	147.066	96949-03-0	439230	C02104	HMDB00227	1.95174e+06	2116711	1359572	1374144	1377364	1324984	1610519	1330339	1392315	1.73315e+06
1659	myo-inositol	Lipid	Inositol Metabolism	1124	LC/MS Polar	363	3506.3	225.062	87-89-8	892	C00137	HMDB00211	34491816	54806156	35154700	55032600	26617754	49243464	51180880	30828920	47905376	51083792
1154	myristate (14:0)	Lipid	Long Chain Fatty Acid	1365	LC/MS Neg	519	5440	227.202	544-63-8	11005	C06424	HMDB00806	48470768	64627496	54187976	55153400	103450928	66556592	46130400	48575476	63733160	61773600
1155	myristoleate (14:1n5)	Lipid	Long Chain Fatty Acid	32418	LC/MS Neg	100001198	5346.9	225.186	544-64-9	5281119	C08322	HMDB02000	3954306	5053251	5287587	3999323	11355517	8580944	4707604	4263904	6069634	7.54595e+06
1418	myristoleoylcarnitine (C14:1)*	Lipid	Fatty Acid Metabolism(Acyl Carnitine)	48182	LC/MS Pos Late	100006051	1316	370.295	889848-55-9	90659872			3202058	2911168	1767615	1677481	3115592	1937251	2522783	2503982	3578477	3273874
1408	myristoylcarnitine (C14)	Lipid	Fatty Acid Metabolism(Acyl Carnitine)	33952	LC/MS Pos Late	100001270	1350	372.311	18822-89-4	6426854		HMDB05066	2335678	3288046	1658764	1717446	2350431	1826490	1948154	1809455	2971241	2308783
3947	N-(2-furoyl)glycine	Xenobiotics	Food Component/Plant	31536	LC/MS Neg	100001086	1525	168.03	5657-19-2;5657-19-2	21863		HMDB00439	57960	77428	119222	75659	39926	67220	90412	75659	35074	58179
3483	N1-Methyl-2-pyridone-5-carboxamide	Cofactors and Vitamins	Nicotinate and Nicotinamide Metabolism	40469	LC/MS Pos Early	100001468	1250	153.066	701-44-0	69698	C05842	HMDB04193	3730249	9007886	6911819	4453627	7967402	7196795	8178937	10501708	6377677	10695999
3484	N1-Methyl-4-pyridone-3-carboxamide	Cofactors and Vitamins	Nicotinate and Nicotinamide Metabolism	57584	LC/MS Pos Early	100001469	1260	153.066	769-49-3	440810	C05843	HMDB04194	10237551	27033198	25132780	18601624	28283948	24139168	24230564	32279254	27809182	31395716
3317	N1-methylinosine	Nucleotide	Purine Metabolism, (Hypo)Xanthine/Inosine containing	48351	LC/MS Pos Early	100001409	1430	283.104	20245-33-4	65095		HMDB02721	147908	245761	177998	142549	96981	177168	240461	235250	119888	215428
3376	N2,N2-dimethylguanosine	Nucleotide	Purine Metabolism, Guanine containing	35137	LC/MS Pos Early	100001412	2210	312.13	2140-67-2	92919		HMDB04824	154344	160172	108468	145780	87271	64418	87037	82090	162979	79027
373	N2,N5-diacetylornithine	Amino Acid	Urea cycle; Arginine and Proline Metabolism	43591	LC/MS Neg	100004575	1367	215.104	39825-23-5	10398396			558787	664711	543546	453775	560555	598062	818694	787756	635420	468114
94	N2,N6-diacetyllysine	Amino Acid	Lysine Metabolism	48455	LC/MS Neg	100006124	1604	229.119	499-86-5	91827			534474	750373	574098	617030	431541	570579	498287	600888	647194	557859
91	N2-acetyllysine	Amino Acid	Lysine Metabolism	36751	LC/MS Polar	100001721	3372.6	187.109	1946-82-3	92907	C12989	HMDB00446	80639	76108			111083	309051	136893	193743		174593
3435	N4-acetylcytidine	Nucleotide	Pyrimidine Metabolism, Cytidine containing	35130	LC/MS Pos Early	100001413	1580	286.103	3768-18-1	107461		HMDB05923	309352	222357	256310	203333	236460	299148	320291	444717	235521	343311
97	N6,N6,N6-trimethyllysine	Amino Acid	Lysine Metabolism	1498	LC/MS Pos Early	189	2825	189.16	23284-33-5	440120	C03793	HMDB01325	14693474	18533024	23703852	25473706	15409548	22085384	20149324	26591288	25617344	20633164
92	N6-acetyllysine	Amino Acid	Lysine Metabolism	36752	LC/MS Polar	100001734	2612.6	187.109	692-04-6	92832	C02727	HMDB00206	592148	937477	754018	844936	844284	1149047	1079618	843390	942502	912952
3350	N6-carbamoylthreonyladenosine	Nucleotide	Purine Metabolism, Adenine containing	35157	LC/MS Neg	100001415	2164	411.127	24719-82-2	161466		HMDB41623	146696	198874	149552	124264	90459	139095	140217	180314	131651	160123
1097	N6-carboxymethyllysine	Carbohydrate	Advanced Glycation End-product	36713	LC/MS Pos Early	100001768	2500	205.118	5746-04-03	123800			1464294	1.87374e+06	2500001	2462139	1057188	1102743	1360012	1344284	2203669	1747834
3359	N6-succinyladenosine	Nucleotide	Purine Metabolism, Adenine containing	48130	LC/MS Neg	100001664	940	382.1	4542-23-8	165243		HMDB00912	94563	162172	228867	149540	87707	253874	178867	214189	219850	153056
69	N-acetyl-1-methylhistidine*	Amino Acid	Histidine Metabolism	43255	LC/MS Pos Early	100004299	2100	212.103		193270			134306	412834	235850	286068	234672	294714	382872	540455	349377	258709
68	N-acetyl-3-methylhistidine*	Amino Acid	Histidine Metabolism	43256	LC/MS Neg	100002204	1360	210.088	37841-04-6	193270			55039	98461	55637	73159	68973	113395	104647	100521	92779	61943
30	N-acetylalanine	Amino Acid	Alanine and Aspartate Metabolism	1585	LC/MS Polar	1110	1564.8	130.051	97-69-8	88064	C02847	HMDB00766	8875898	13151586	10634324	12454051	7.70367e+06	10116812	11414355	12769940	11390230	11999212
368	N-acetylarginine	Amino Acid	Urea cycle; Arginine and Proline Metabolism	33953	LC/MS Pos Early	100001266	2245	217.13	155-84-0	67427	C02562	HMDB04620	1865140	2013432	2350153	2669484	1826044	2924754	2061905	3177736	2633681	2039885
39	N-acetylasparagine	Amino Acid	Alanine and Aspartate Metabolism	33942	LC/MS Polar	100001257	2250	173.057	4033-40-3	99715		HMDB06028	3295422	3579179	3288642	4234377	2411027	3.81565e+06	3.33241e+06	3051796	6054238	2379871
35	N-acetylaspartate (NAA)	Amino Acid	Alanine and Aspartate Metabolism	22185	LC/MS Neg	100000787	620.5	174.041	997-55-7;997-55-7	65065	C01042	HMDB00812	3784885	4296683	4061661	4842745	3431145	3650151	4077493	4304248	4413415	3745449
52	N-acetyl-aspartyl-glutamate (NAAG)	Amino Acid	Glutamate Metabolism	35665	LC/MS Pos Early	100001612	1035	305.098	3106-85-2	5255	C12270	HMDB01067	99383	112308	181696	142675	103496	166697	104719	149702	128462	120997
3422	N-acetyl-beta-alanine	Nucleotide	Pyrimidine Metabolism, Uracil containing	37432	LC/MS Neg	100002102	773	130.051	3025-95-4	76406	C01073		820879	747946	600939	692783	548776	827846	836979	853570	583253	878750
78	N-acetylcarnosine	Amino Acid	Histidine Metabolism	43488	LC/MS Neg	100004046	1235	267.11	56353-15-2	9903482		HMDB12881	48957	76025	68102	73954	60180	123508	123908	118456	69056	92016
369	N-acetylcitrulline	Amino Acid	Urea cycle; Arginine and Proline Metabolism	48434	LC/MS Neg	100001577	940	216.099	33965-42-3	656979	C15532	HMDB00856	711233	921600	717108	590213	567645	812806	595187	830791	559378	570828
1096	N-acetylglucosamine/N-acetylgalactosamine	Carbohydrate	Aminosugar Metabolism	46539	LC/MS Pos Early	100006435	715	222.097		24139		HMDB00215	921693	980123	1161791	1214232	744075	1207765		1195160	1299841	1208111
44	N-acetylglutamate	Amino Acid	Glutamate Metabolism	15720	LC/MS Pos Early	100000282	1050	190.071	5817-08-03	70914	C00624	HMDB01138	3153969	5722568	5494023	5268173	3912985	3741175	4205191	3878482	7275172	2691722
45	N-acetylglutamine	Amino Acid	Glutamate Metabolism	33943	LC/MS Polar	100001253	2140	187.072	2490-97-3	182230	C02716	HMDB06029	20230248	35342280	49339408	54184564	34107292	70649328	64563696	61285476	64245132	29981666
2	N-acetylglycine	Amino Acid	Glycine, Serine and Threonine Metabolism	27710	LC/MS Polar	100001006	1780	116.035	543-24-8	10972		HMDB00532	10263354	14239848	11733262	11891797	14972616	18907320	15257000	12063222	11884193	11648178
88	N-acetylhistamine	Amino Acid	Histidine Metabolism	48679	LC/MS Pos Early	100006123	2287	154.097	673-49-4	69602	C05135	HMDB13253			405983	80285		175042	294262	326411	162388	277466
67	N-acetylhistidine	Amino Acid	Histidine Metabolism	33946	LC/MS Neg	100001293	900	196.073	39145-52-3	75619	C02997	HMDB32055	1.58856e+06	3189997	2678103	2367559	3326200	4671138	3860968	4011765	2388537	3.16265e+06
286	N-acetylisoleucine	Amino Acid	Leucine, Isoleucine and Valine Metabolism	33967	LC/MS Neg	100001276	2325	172.098	3077-46-1	2802421		HMDB61684	1670696	2822433	1472760	1.7677e+06	1351275	1244236	1109728	1.8435e+06	2570722	1448056
216	N-acetylkynurenine (2)	Amino Acid	Tryptophan Metabolism	48757	LC/MS Neg	100006378	2378	249.088					1103359	1087595	945297	851025	599142	1073243	1.17175e+06	1114093	942044	841312
251	N-acetylleucine	Amino Acid	Leucine, Isoleucine and Valine Metabolism	1587	LC/MS Neg	1082	2400	172.098	1188-21-2	70912	C02710	HMDB11756	6651996	10585644	6528648	8262517	6651794	4664472	5103940	6062178	16933626	3.46695e+06
317	N-acetylmethionine	Amino Acid	Methionine, Cysteine, SAM and Taurine Metabolism	1589	LC/MS Neg	1083	1787	190.054	65-82-7	448580	C02712	HMDB11745	4641903	5851678	5645722	5731258	4269031	3095438	3972722	3675676	7853828	2465360
1082	N-acetylneuraminate	Carbohydrate	Aminosugar Metabolism	32377	LC/MS Polar	1162	3072.6	308.099	131-48-6	439197	C00270	HMDB00230	655840	1137924	1673809	1108773	536541	1409154	1017691	1198853	905593	1791154
116	N-acetylphenylalanine	Amino Acid	Phenylalanine Metabolism	33950	LC/MS Neg	100001256	2597	206.082	2018-61-3	74839	C03519	HMDB00512	12180848	6387167	4326340	4847664	5014041	4290505	3420314	3460251	6606431	3735060
406	N-acetylputrescine	Amino Acid	Polyamine Metabolism	37496	LC/MS Pos Early	192	2230	131.118	18233-70-0	122356	C02714	HMDB02064	325579	434926	417231	475096	186144	338547	368625	449847	491389	363358
4068	N-acetylpyrraline	Xenobiotics	Food Component/Plant	48438	LC/MS Neg	100006120	2545	295.13					1053754	869279	603154	585680	734810	776146	767850	602285	772840	481088
10	N-acetylserine	Amino Acid	Glycine, Serine and Threonine Metabolism	37076	LC/MS Polar	100001851	2000	146.046	97-14-3	65249		HMDB02931	17664064	20322088	21690716	24887632	16853044	34866848	30648582	28574816	25593106	21415312
347	N-acetyltaurine	Amino Acid	Methionine, Cysteine, SAM and Taurine Metabolism	48187	LC/MS Neg	100005466	800	166.018		159864			7606609	10855948	12960231	16689482	6958142	6590971	9087954	11968629	12894122	8794249
17	N-acetylthreonine	Amino Acid	Glycine, Serine and Threonine Metabolism	33939	LC/MS Neg	100001274	821.6	160.062	17093-74-2	152204			2702491	4650490	3605319	3409706	4076887	5883475	6074294	5436068	4106817	4913851
204	N-acetyltryptophan	Amino Acid	Tryptophan Metabolism	33959	LC/MS Neg	100001254	2630	245.093	1218-34-4	700653	C03137	HMDB13713	13163487	7.25123e+06	7406239	7.28079e+06	4286832	5905591	4027807	5628744	7031816	4575018
132	N-acetyltyrosine	Amino Acid	Tyrosine Metabolism	32390	LC/MS Neg	100001104	1680	222.077	537-55-3	68310		HMDB00866	3374493	1.41308e+06	1176367	1445640	1532486	1910298	1262875	1380601	1302579	919974
305	N-acetylvaline	Amino Acid	Leucine, Isoleucine and Valine Metabolism	1591	LC/MS Neg	1084	1704	158.082	96-81-1	66789		HMDB11757	516024	799102	595183	641597	377474	413876	472754	610537	759091	527138
372	N-alpha-acetylornithine	Amino Acid	Urea cycle; Arginine and Proline Metabolism	32984	LC/MS Pos Early	100000285	2000	175.108	6205-08-09	439232	C00437	HMDB03357	27494	160283	286527	209301	117084	209221	336633	209914	314178	136294
371	N-delta-acetylornithine	Amino Acid	Urea cycle; Arginine and Proline Metabolism	43249	LC/MS Neg	100004523	858	173.093		9920500			3700072	4810891	3360306	2533823	5784276	3905717	6657038	2501223	1678683	4.15483e+06
1443	nervonoylcarnitine (C24:1)*	Lipid	Fatty Acid Metabolism(Acyl Carnitine)	57531	LC/MS Pos Late	100015846	1602	510.452					148198	137058	94697	98544	203616	148828	182728	169620	136278	146393
220	N-formylanthranilic acid	Amino Acid	Tryptophan Metabolism	43549	LC/MS Polar	100004561	900	164.035	3342-77-6	101399	C05653	HMDB04089	1.03773e+06	556250	365351	509120	315110	1002335	734904	1200091	298584	980572
318	N-formylmethionine	Amino Acid	Methionine, Cysteine, SAM and Taurine Metabolism	2829	LC/MS Neg	194	1543.8	176.039	4289-98-9	439750	C03145	HMDB01015	1.80835e+06	2892258	3196369	2827187	1838802	2523508	2648416	2395454	3321995	2096957
183	N-formylphenylalanine	Amino Acid	Tyrosine Metabolism	48433	LC/MS Neg	100006056	2360	192.067	13200-85-6	759256			110221	90072.7	189841	163206	74288	71237	113162	88371.6	185092	88460.1
3953	N-glycolylneuraminate	Xenobiotics	Food Component/Plant	37123	LC/MS Polar	100001491	3327.5	324.094	1113-83-3	123802	C03410	HMDB00833	595918	826230	1127381	839374	735457	1788095	1119853	995672	918998	1323830
3464	nicotinamide	Cofactors and Vitamins	Nicotinate and Nicotinamide Metabolism	594	LC/MS Pos Early	432	1942	123.055	98-92-0	936	C00153	HMDB01406	9407728	21837988	29476412	30187660	21422270	29888724	19106024	30650760	44368552	16822672
3475	nicotinamide N-oxide	Cofactors and Vitamins	Nicotinate and Nicotinamide Metabolism	39582	LC/MS Pos Early	100002763	877	139.05	1986-81-8	72661		HMDB02730	595696	1406560	600591	556038	2162014	2550689	1378329	1852086	711930	2.90897e+06
3467	nicotinamide riboside	Cofactors and Vitamins	Nicotinate and Nicotinamide Metabolism	33013	LC/MS Pos Early	100001310	2040	255.098	1341-23-7	439924	C03150	HMDB00855		116154	297092	403746		112267	68903	227278		243307
3462	nicotinate ribonucleoside	Cofactors and Vitamins	Nicotinate and Nicotinamide Metabolism	33471	LC/MS Pos Early	100001316	1536	256.082	2625-49-2	161234	C05841	HMDB06809	348372	482078	849181	504458	328147	151607	201708	173896	461077	118709
1204	nisinate (24:6n3)	Lipid	Polyunsaturated Fatty Acid (n3 and n6)	57810	LC/MS Neg	100015785	5657	355.264	68378-49-4	11792612		HMDB02007	2244745	2323532	1333955	1711383	6775081	2573796	1518587	1971854	2411493	2121717
1642	N-linoleoyltaurine*	Lipid	Endocannabinoid	61826	LC/MS Neg	100005814	5505	386.237					961380	523532	901573	1411241	748581	476993	399854	454850	1608243	532598
31	N-methylalanine	Amino Acid	Alanine and Aspartate Metabolism	37069	LC/MS Pos Early	100001823	1536	104.071	600-21-5	5288725	C02721	HMDB01906	266463	866962	619348	523188	548475	560338	402305	470763	858392	601831
56	N-methyl-GABA	Amino Acid	Glutamate Metabolism	39577	LC/MS Pos Early	100003152	2109	118.086	1119-48-8	70703	C15987		5966548	5215426	7087231	7740722	4290960	3130608	3.59951e+06	3343915	16006738	3820818
381	N-methylproline	Amino Acid	Urea cycle; Arginine and Proline Metabolism	37431	LC/MS Pos Early	100001956	1335	130.086	475-11-6	557			2878390	7553811	3300482	3.86208e+06	2806872	2462378	2833062	3343327	5229708	2275885
383	N-monomethylarginine	Amino Acid	Urea cycle; Arginine and Proline Metabolism	43586	LC/MS Pos Early	100004488	2845	189.135	53308-83-1	132862	C03884	HMDB29416	1058691	681052	733537		1097163		1057548	793671	804603
1386	N-octanoylglycine	Lipid	Fatty Acid Metabolism(Acyl Glycine)	43502	LC/MS Neg	100003940	4335.4	200.129	14246-53-8	84290		HMDB00832	50958	362889	785962	1108609	144392	153778	159636	58914	612531	78893
1638	N-oleoyltaurine	Lipid	Endocannabinoid	39732	LC/MS Neg	100003119	5610	388.253	52514-04-2	6437033			869557	652728	744237	967677	631758	467659	394776	377953	1053485	534237
1174	nonadecanoate (19:0)	Lipid	Long Chain Fatty Acid	1356	LC/MS Neg	892	6068	297.28	646-30-0	12591	C16535	HMDB00772	8027679	6326900	3905739	4344744	12124064	5714977	5055858	5726525	4583681	5656655
1387	N-palmitoylglycine	Lipid	Fatty Acid Metabolism(Acyl Glycine)	42092	LC/MS Neg	100003686	5580	312.254	2441-41-0	151008		HMDB13034	64999				96232				73593
2347	N-palmitoyl-sphinganine (d18:0/16:0)	Lipid	Sphingolipid Metabolism	52604	LC/MS Pos Late	100009028	3090	540.535	5966-29-0	5283572		HMDB11760	952328	636767	713541	732189	981609	953148	1083693	577861	462871	490635
2445	N-palmitoyl-sphingosine (d18:1/16:0)	Lipid	Ceramides	44877	LC/MS Pos Late	1518	2893	538.519	24696-26-2	5283564		HMDB04949	2090415	5303642	2166798	3587262	2369381	1.59966e+06	2231544	1.95685e+06	3231011	1.89782e+06
1640	N-palmitoyltaurine	Lipid	Endocannabinoid	39835	LC/MS Neg	100003239	5560	362.237	83982-06-3				768441	382309	539923	547153	459634	269820	288607	251830	658876	370025
2447	N-stearoyl-sphingosine (d18:1/18:0)*	Lipid	Ceramides	54979	LC/MS Pos Late	1547	3392	566.551	104404-17-3	5283565		HMDB04950	304170	839586	596153	483407	367783	238092	249740	380836	448844	444085
1639	N-stearoyltaurine	Lipid	Endocannabinoid	39730	LC/MS Neg	100003240	5782	390.268	63155-80-6	168274			615351	360540	381874	388501	522973	350713	290705	320337	530760	456169
114	N-trimethyl 5-aminovalerate	Amino Acid	Lysine Metabolism	57687	LC/MS Pos Early	100015962	2186	160.133					154754144	138842400	162689008	181154272	132762720	205971424	184751504	155076240	189458560	185178400
3663	o-cresol sulfate	Xenobiotics	Benzoate Metabolism	36845	LC/MS Neg	100001806	2796	187.007		11615528			69103	105071	131913	113933	51954	96598	97959	107531	101170	109138
1315	octadecadienedioate (C18:2-DC)*	Lipid	Fatty Acid, Dicarboxylate	61860	LC/MS Neg	100019982	4676	309.207					250942		136155	194815	117414	137832	82519		193613
1313	octadecanedioate (C18-DC)	Lipid	Fatty Acid, Dicarboxylate	36754	LC/MS Neg	100001615	5043	313.238	871-70-5	70095		HMDB00782	578007	429984	388787	436252	315872	345146	328972	265125	547795	306093
1314	octadecenedioate (C18:1-DC)*	Lipid	Fatty Acid, Dicarboxylate	61861	LC/MS Neg	100019978	4875	311.223					1769343	1536205	1.6898e+06	2082319	1240883	1055096	631668	566225	2346005	846971
1427	octadecenedioylcarnitine (C18:1-DC)*	Lipid	Fatty Acid Metabolism(Acyl Carnitine)	61865	LC/MS Pos Late	100005996	1180	456.332	251981-06-3				227195	136592	105858	120034	126653	130603	100122	93202	340890	179708
1401	octanoylcarnitine (C8)	Lipid	Fatty Acid Metabolism(Acyl Carnitine)	33936	LC/MS Pos Late	100001247	950	288.217	3671-77-0	123701	C02838	HMDB00791	230242	476175	3.68189e+06	5116011	225345	220404	219338	139977	2143419	194376
1167	oleate/vaccenate (18:1)	Lipid	Long Chain Fatty Acid	52285	LC/MS Neg	100008930	5655	281.249					894438272	1054524288	718476160	862205696	2032878464	1130702976	708672000	768501888	1065198848	967703488
1626	oleoyl ethanolamide	Lipid	Endocannabinoid	38102	LC/MS Neg	1137	6450	324.291	11-58-0;111-58-0	5283454		HMDB02088	1879002	1736392	1175950	2307005	2343614	1799537	941699	1979139	2865023	2129018
2316	oleoyl-arachidonoyl-glycerol (18:1/20:4) [2]*	Lipid	Diacylglycerol	54961	LC/MS Pos Late	100010937	2990	660.556				HMDB07228	550595		1882592	1365795	1180374	958380	1411623	1054362	1826206	1119255
1416	oleoylcarnitine (C18:1)	Lipid	Fatty Acid Metabolism(Acyl Carnitine)	35160	LC/MS Pos Late	100001501	1423	426.358	38677-66-6	6441392		HMDB05065	10345345	16081125	8824718	9265093	12314762	9029865	10510359	10738240	17696070	10294326
1461	oleoylcholine	Lipid	Fatty Acid Metabolism (Acyl Choline)	53260	LC/MS Pos Late	100009331	1449	368.352					1.57051e+06	544965			373058	993989	365333	493357		693225
2302	oleoyl-linoleoyl-glycerol (18:1/18:2) [1]	Lipid	Diacylglycerol	46798	LC/MS Pos Late	100002989	3115	636.556	106292-55-1			HMDB07219	1131427	2203964	3360492	4132444	3301271	3565268	3114720	2042716	2710831	2582864
2303	oleoyl-linoleoyl-glycerol (18:1/18:2) [2]	Lipid	Diacylglycerol	46799	LC/MS Pos Late	100002990	3223	636.556	104346-53-4			HMDB07219	1300441	2714409	4453808	6041688	3317039	3.67604e+06	3471192	2.07533e+06	6957912	2701511
2299	oleoyl-oleoyl-glycerol (18:1/18:1) [1]*	Lipid	Diacylglycerol	54945	LC/MS Pos Late	100010918	3571	638.572				HMDB07218	239735	747403	1289694	996418		868425	830024	627422	1473887	1062472
2300	oleoyl-oleoyl-glycerol (18:1/18:1) [2]*	Lipid	Diacylglycerol	54946	LC/MS Pos Late	100010919	3695	638.572				HMDB07218	745126	1322231	2401553	2770054	1379091	1380173	1288214	1069736	3.94603e+06	1547642
431	ophthalmate	Amino Acid	Glutathione Metabolism	34592	LC/MS Pos Early	100001311	2085	290.135	495-27-2	7018721		HMDB05765	198415	123196	593076	545721	307507	1081680	303587	234945	302572	106879
357	ornithine	Amino Acid	Urea cycle; Arginine and Proline Metabolism	1493	LC/MS Pos Early	444	2800	133.097	3184-13-2	6262	C00077	HMDB03374	195444000	95417000	125347464	104221792	143704112	121410128	117807664	145517792	134307552	96287160
3389	orotate	Nucleotide	Pyrimidine Metabolism, Orotate containing	1505	LC/MS Polar	445	1638.1	155.01	50887-69-9	967	C00295	HMDB00226	114055240	87652096	117517768	93991272	76949576	92884896	87844928	97444624	62787652	93384104
3391	orotidine	Nucleotide	Pyrimidine Metabolism, Orotate containing	35172	LC/MS Polar	100001416	2250	287.052	314-50-1	92751		HMDB00788	4540798	6542239	6.20894e+06	6142268	2815820	3970586	5.76444e+06	5099003	4967335	4541708
4582	O-sulfo-L-tyrosine	Xenobiotics	Chemical	45413	LC/MS Neg	100005384	990	260.023		514186			186714	288638	259180	229832	218351	263801	313063	307238	143803	232764
3507	oxalate (ethanedioate)	Cofactors and Vitamins	Ascorbate and Aldarate Metabolism	20694	LC/MS Neg	100000841	603	88.988	144-62-7	971	C00209	HMDB02329	8146369	9913214	13390372	12153502	8379550	11972556	13388299	13636867	12263877	13025829
1159	palmitate (16:0)	Lipid	Long Chain Fatty Acid	1336	LC/MS Neg	424	5618	255.233	57-10-3	985	C00249	HMDB00220	1295889920	1688909312	1201693696	1330009728	2238034432	1384810240	1252918656	1278107264	1455951104	1376178560
1160	palmitoleate (16:1n7)	Lipid	Long Chain Fatty Acid	33447	LC/MS Neg	452	5475	253.217	373-49-9	445638	C08362	HMDB03229	130357944	196883936	128601600	142976400	341602560	171169328	108300432	106429552	208128928	158876656
1411	palmitoleoylcarnitine (C16:1)*	Lipid	Fatty Acid Metabolism(Acyl Carnitine)	53223	LC/MS Pos Late	100009406	1357	398.326		71464547			1910048	3939918	1554568	1880392	1805211	1284592	1861180	1.87247e+06	4733161	2126358
2358	palmitoyl dihydrosphingomyelin (d18:0/16:0)*	Lipid	Sphingolipid Metabolism	52434	LC/MS Pos Late	100008954	2290	705.591		9939965			12113111	11806837	10300862	11013685	11765700	10585679	11436943	9294790	12748310	10640214
1629	palmitoyl ethanolamide	Lipid	Endocannabinoid	38165	LC/MS Neg	1489	6300	298.275	544-31-0	4671	C16512	HMDB02100	1284994	1464076	961813	1866206	1989086	1689684	852540	1.71843e+06	2.08818e+06	1324809
2360	palmitoyl sphingomyelin (d18:1/16:0)	Lipid	Sphingolipid Metabolism	37506	LC/MS Pos Late	100002107	2168	703.575	6254-89-3	9939941			138008384	116883928	129226472	111790088	141842608	116041848	135601728	121408848	122161456	147240048
1410	palmitoylcarnitine (C16)	Lipid	Fatty Acid Metabolism(Acyl Carnitine)	44681	LC/MS Pos Late	100000776	1425	400.342	6865-14-1	461	C02990	HMDB00222	11350060	13386870	9696358	7833500	12951770	11110154	12042348	11432045	11737271	11899194
1460	palmitoylcholine	Lipid	Fatty Acid Metabolism (Acyl Choline)	52944	LC/MS Pos Late	100009233	1482	342.337		151731			2347283	1173338		86116	829221	1944224	1010672	1.01966e+06	375267	1183032
2283	palmitoyl-linoleoyl-glycerol (16:0/18:2) [1]*	Lipid	Diacylglycerol	52633	LC/MS Pos Late	100009052	3080	610.541		9543695		HMDB07103		250529		453251	349827	747362	604288	399410		410675
2284	palmitoyl-linoleoyl-glycerol (16:0/18:2) [2]*	Lipid	Diacylglycerol	52634	LC/MS Pos Late	100009055	3197	610.541				HMDB07103		512614		700958	516751	1053381	1063665	212934	1095718	531455
2282	palmitoyl-oleoyl-glycerol (16:0/18:1) [2]*	Lipid	Diacylglycerol	54942	LC/MS Pos Late	100010917	3695	612.556			C13861	HMDB07102			103697	340880					346670
3491	pantothenate	Cofactors and Vitamins	Pantothenate and CoA Metabolism	1508	LC/MS Neg	1024	1498.7	218.103	137-08-6	6613	C00864	HMDB00210	27957470	27271848	23594828	24304744	30221400	19204156	17682554	18336848	38103512	19510092
3656	p-cresol sulfate	Xenobiotics	Benzoate Metabolism	36103	LC/MS Neg	100001315	2890	187.007	3233-57-7	4615423		HMDB11635	2531158	2894694	2982247	3535345	5482505	26364172	45068724	28423096	1243917	5329407
181	p-cresol-glucuronide*	Amino Acid	Tyrosine Metabolism	48841	LC/MS Neg	100006191	2420	283.082	17680-99-8	154035		HMDB11686	125998	265227	147768	210407	242309	1584577	3091418	2117272	75208	278634
1158	pentadecanoate (15:0)	Lipid	Long Chain Fatty Acid	1361	LC/MS Neg	980	5521	241.217	1002-84-2;10002-84-2	13849	C16537	HMDB00826	25672370	24719950	22159726	25767822	31745120	25577608	23470076	23356852	28291768	25581406
1446	pentadecanoylcarnitine (C15)*	Lipid	Fatty Acid Metabolism(Acyl Carnitine)	57522	LC/MS Pos Late	100015842	1362	386.326					209536	331017	148844	158885	204122	196185	182708	232669	328017	300270
4675	perfluorooctanesulfonic acid (PFOS)	Xenobiotics	Chemical	57564	LC/MS Neg	100010955	5233	498.93	1763-23-1	74483	C18142	HMDB59586	1253639	2414316	3272112	3.10816e+06	2882993	2249035	3738209	3238133	8426153	2890238
147	phenol glucuronide	Amino Acid	Tyrosine Metabolism	52747	LC/MS Neg	100006679	1800	269.067	17685-05-1	87235		HMDB60014	497392	1145575	2240898	1490463	308767	1367369	2298164	3208084		1674310
146	phenol sulfate	Amino Acid	Tyrosine Metabolism	32553	LC/MS Neg	100001510	2156	172.991	937-34-8	74426	C02180	HMDB60015	50015548	91388456	137315264	103426872	54962388	147883984	144469760	193909840	10237015	153249856
880	phenylacetylglycine	Peptide	Acetylated Peptides	33945	LC/MS Pos Early	100001275	2317	194.081	500-98-1	68144	C05598	HMDB00821	10186659	19515968	19852094	21187670	9000707	20494572	16713580	28840814	11733303	27287660
115	phenylalanine	Amino Acid	Phenylalanine Metabolism	64	LC/MS Pos Early	460	2878	166.086	63-91-2	6140	C00079	HMDB00159	1189571968	755217600	823988160	860368896	810998080	646841152	671794048	687064256	1003345152	702449984
120	phenyllactate (PLA)	Amino Acid	Phenylalanine Metabolism	22130	LC/MS Neg	100000774	2208	165.056	828-01-3	3848	C05607	HMDB00779	4000279	4306388	5978298	3905213	1289733	2075817	4404110	3052473	4771757	2187826
3664	phenylpropionylglycine	Xenobiotics	Benzoate Metabolism	35434	LC/MS Neg	100001591	2945	206.082	56613-60-6	152323		HMDB00860	1607016	10886640	21613308	19303472	2146618	2101670	5436118	2933552	19199168	1258196
119	phenylpyruvate	Amino Acid	Phenylalanine Metabolism	566	LC/MS Neg	241	2515	163.04	156-06-9	997	C00166	HMDB00205	1160725	609322	676854	543381	601323	452224	734488	474137	577233	734292
1126	phosphate	Energy	Oxidative Phosphorylation	42109	LC/MS Pos Early	461	576	98.9842	7664-38-2	1061	C00009	HMDB01429	194245584	191079840	303406848	290351008	176799088	262561648	269626048	303308288	354144384	290598112
1689	choline phosphate	Lipid	Phospholipid Metabolism	34396	LC/MS Pos Early	267	700	184.073	72556-74-2	1014	C00588	HMDB01565	1484132	1892695	4095180	4536056	2122893	2657387	1643943	2451995	5270341	2151370
1694	phosphoethanolamine	Lipid	Phospholipid Metabolism	1600	LC/MS Neg	1026	638	140.012	1071-23-4	1015	C00346	HMDB00224	302299	287221	141656	227478	263199	280604	217630	217714	144852	277642
1297	pimelate (C7-DC)	Lipid	Fatty Acid, Dicarboxylate	15704	LC/MS Polar	100000101	2745	159.066	111-16-0	385	C02656	HMDB00857	375782	395018	643957	268827	143420		559653	199056	403625	157825
1424	pimeloylcarnitine/3-methyladipoylcarnitine (C7-DC)	Lipid	Fatty Acid Metabolism(Acyl Carnitine)	53224	LC/MS Pos Early	100009407	2773	304.175					68534	91595				92538	83597	58027	112184
109	pipecolate	Amino Acid	Lysine Metabolism	1444	LC/MS Pos Early	1025	2200	130.086	4043-87-2	849	C00408	HMDB00070	26681256	60067908	54998672	51408152	56068764	45205260	56683980	64473580	61467608	47664680
364	proline	Amino Acid	Urea cycle; Arginine and Proline Metabolism	1898	LC/MS Pos Early	480	1603	116.071	147-85-3	145742	C00148	HMDB00162	1222802304	799503616	1108147072	976806528	949878976	1002162240	1014515456	931448576	1187738880	681607040
718	prolylglycine	Peptide	Dipeptide	40703	LC/MS Pos Early	100003674	2136	173.092	2578-57-6	6426709		HMDB11178	2691766	2088298	1268342	1432508	1.8728e+06	1.81506e+06	2357347	1977323	1104345	1639061
378	pro-hydroxy-pro	Amino Acid	Urea cycle; Arginine and Proline Metabolism	35127	LC/MS Pos Early	100001167	2128	229.118	18684-24-7	11673055		HMDB06695	2761982	6249793	5265436	5743556	1965829	5493295	7057126	7.73283e+06	4995848	5.09552e+06
1371	propionylcarnitine (C3)	Lipid	Fatty Acid Metabolism (also BCAA Metabolism)	32452	LC/MS Pos Early	100001162	2590	218.139	17298-37-2	107738	C03017	HMDB00824	20885436	9854282	21032854	19001112	8457850	8942080	6.17128e+06	4617578	39523072	4973297
1372	propionylglycine	Lipid	Fatty Acid Metabolism (also BCAA Metabolism)	31932	LC/MS Neg	100001150	960	130.051	21709-90-0	98681		HMDB00783	322384	976094	655231	560637	775710	1152396	731978	764807	921318	539219
3403	pseudouridine	Nucleotide	Pyrimidine Metabolism, Uracil containing	33442	LC/MS Neg	821	1100	243.062	1445-07-4	15047	C02067	HMDB00767	7366017	8655611	6765554	4965825	7325084	8.0987e+06	8485940	8847064	4557270	8.3885e+06
3586	pyridoxal	Cofactors and Vitamins	Vitamin B6 Metabolism	1651	LC/MS Pos Early	491	2343	168.066	65-22-5	1050	C00250	HMDB01545	9043685	9337416	7439814	6625860	7484505	6259921	7566669	6665962	9718571	7136582
3587	pyridoxate	Cofactors and Vitamins	Vitamin B6 Metabolism	31555	LC/MS Neg	100001121	2185	182.046	82-82-6	6723	C00847	HMDB00017	4422721	6622818	9367525	9412448	2.04003e+06	5750448	6372027	6288141	11746087	5747873
51	pyroglutamine*	Amino Acid	Glutamate Metabolism	46225	LC/MS Pos Early	100001540	1900	129.066	2353-44-8	134508			6030625	9015455	8.36951e+06	9138788	5247817	6862294	7705665	7954957	9139936	6352721
4062	pyrraline	Xenobiotics	Food Component/Plant	48428	LC/MS Neg	100001767	2304	253.119	74509-14-1	122228		HMDB33143	588408	620258	500625	434109	450111	585455	674366	626144	419518	457259
924	pyruvate	Carbohydrate	Glycolysis, Gluconeogenesis, and Pyruvate Metabolism	48990	LC/MS Polar	823	1083	87.0088	127-17-3	1060	C00022	HMDB00243	70770176	75066320	73324384	66665440	77720840	58510944	49829900	46317208	45516460	45186320
3985	quinate	Xenobiotics	Food Component/Plant	18335	LC/MS Polar	100000442	2432.9	191.056	77-95-2	6508	C00296	HMDB03072	341416	366969	486346	574987	237501	639334	659400	564659	287685
3460	quinolinate	Cofactors and Vitamins	Nicotinate and Nicotinamide Metabolism	1899	LC/MS Polar	182	3000	166.015	89-00-9	1066	C03722	HMDB00232	1672471	1882778	1716455	3085977	1834314	3943461	2504454	2762182	1366710	1920607
3574	retinal	Cofactors and Vitamins	Vitamin A Metabolism	40807	LC/MS Pos Late	100004088	1666	285.221		638015	C00376	HMDB01358	18570.6	18342.4	33893.1	43908	38745.2	52441	52577	69000.3	50865	26208
3567	retinol (Vitamin A)	Cofactors and Vitamins	Vitamin A Metabolism	1806	LC/MS Pos Late	498	1636	269.226	68-26-8	445354	C00473	HMDB00305	9726056	17144496	18748308	18435816	16015217	13889441	18179544	21141312	16796598	16180224
943	ribitol	Carbohydrate	Pentose Metabolism	15772	LC/MS Polar	100000406	1789.6	151.061	488-81-3	6912	C00474	HMDB00508	570221	773052	877529	1394794	449115	463549	562310	326507	2023019	372084
944	ribonate	Carbohydrate	Pentose Metabolism	27731	LC/MS Polar	100001007	2425	165.04	5336-08-03	5460677	C01685	HMDB00867	7.5055e+06	19342274	15429351	17166964	14484819	17724196	19884194	8643688	26343440	23124740
969	ribulonate/xylulonate*	Carbohydrate	Pentose Metabolism	61858	LC/MS Polar	100019968	2350	165.04					20742976	39996064	45914548	62507272	37921140	38482652	38955104	20354104	28837462	41748680
4629	S-(3-hydroxypropyl)mercapturic acid (HPMA)	Xenobiotics	Chemical	44552	LC/MS Neg	100004568	1576	220.065	23127-40-4	3371179			292754	381072	471185	503823	321600	692874	741188	708741	459769	449627
59	S-1-pyrroline-5-carboxylate	Amino Acid	Glutamate Metabolism	42370	LC/MS Pos Early	35	1528	114.055	2906-39-0	1196	C04322	HMDB01301	735324	792754	641330	584655	728603	895204	751314	950123	663237	547221
328	S-adenosylhomocysteine (SAH)	Amino Acid	Methionine, Cysteine, SAM and Taurine Metabolism	42382	LC/MS Neg	197	1832.4	383.114	979-92-0	439155	C00021	HMDB00939	73734	58239	338581	834354	54050	105597	56676	65296	1661761	51707
4511	salicylate	Xenobiotics	Drug - Topical Agents	1515	LC/MS Polar	501	802	137.024	69-72-7	338	C00805	HMDB01895	1736830	1811312	1300376	1.86194e+06	1172826	1064509	1226237	1274677	1167415	1254121
4	sarcosine	Amino Acid	Glycine, Serine and Threonine Metabolism	1516	LC/MS Pos Early	1023	1280	90.055	107-97-1	1088	C00213	HMDB00271	9366683	12350957	12061558	14611013	10878816	8107036	9335485	8923873	17983546	9529059
1305	sebacate (C10-DC)	Lipid	Fatty Acid, Dicarboxylate	32398	LC/MS Polar	100001211	2147	201.113	111-20-6	5192	C08277	HMDB00792	290145	225608	189621	134916	229750	209714	186325	126000	159404	236992
968	sedoheptulose	Carbohydrate	Pentose Metabolism	53237	LC/MS Polar	100002619	2255	209.067	3019-74-7	5459879		HMDB03219	692936	854060	810264	1171673	782585	1473198	875620	1085337	2275241	1209838
9	serine	Amino Acid	Glycine, Serine and Threonine Metabolism	1648	LC/MS Pos Early	503	1239	106.05	56-45-1	5951	C00065	HMDB00187	244910048	144845280	169470096	167440064	148477824	154993584	171809056	149626240	178822016	154084576
227	serotonin	Amino Acid	Tryptophan Metabolism	2342	LC/MS Pos Early	504	2550	177.102	153-98-0	5202	C00780	HMDB00259	457514	94563	120202	155185	93816	131065	610106	274561	56906	233216
336	S-methylcysteine	Amino Acid	Methionine, Cysteine, SAM and Taurine Metabolism	39592	LC/MS Neg	100002749	880	134.028	1187-84-4	24417		HMDB02108	99901	63513			86581	136905	180074	139501		131819
421	S-methylglutathione	Amino Acid	Glutathione Metabolism	33944	LC/MS Neg	100001259	1075	320.092	2922-56-7	3605667	C11347		75779	115748	199046	181329	118770	88449	112467	84386	208255	65991
319	S-methylmethionine	Amino Acid	Methionine, Cysteine, SAM and Taurine Metabolism	38127	LC/MS Pos Early	100002183	2555	164.074	3493-12-07	458	C05319	HMDB38670	800439	338917	1265364	1345732	510127	3997426	707829	1218593	1518022	547619
397	spermidine	Amino Acid	Polyamine Metabolism	485	LC/MS Pos Early	50	3355	146.165	124-20-9	1102	C00315	HMDB01257	1258128	175441	921413	644640	1515508	980616	501234	601147	1620747	986110
2402	sphingadienine	Lipid	Sphingolipid Metabolism	57426	LC/MS Pos Late	100015643	1350	298.274	25696-03-1	6449795			146669	137834	190758	148833	117580		97736	171530	139936	170197
2343	sphinganine	Lipid	Sphingolipid Metabolism	17769	LC/MS Pos Late	313	1413	302.305	3102-56-5	3126	C00836	HMDB00269	135732		303443	121943		84126	160365	195175	130546	147999
2344	sphinganine-1-phosphate	Lipid	Sphingolipid Metabolism	52605	LC/MS Pos Late	100001876	1431	382.272	19794-97-9	520		HMDB01383	610939	750042	1131044	885923	340402	505663	872261	913598	1116384	945454
2443	sphingomyelin (d17:1/14:0, d16:1/15:0)*	Lipid	Sphingolipid Metabolism	62152	LC/MS Pos Late	100020276	1950	661.528					494165	670571	440688	488128	544694	256844	276280	416138	561612	622080
2368	sphingomyelin (d17:1/16:0, d18:1/15:0, d16:1/17:0)*	Lipid	Sphingolipid Metabolism	52433	LC/MS Pos Late	100006314	2082	689.559	121999-58-4				26616078	24150866	18468592	25192450	19987948	14406528	12454329	17364524	24807792	20315742
2395	sphingomyelin (d17:2/16:0, d18:2/15:0)*	Lipid	Sphingolipid Metabolism	57483	LC/MS Pos Late	100015793	1837	687.544					423320	589538	524866	521751	598268	300899	415132	524724	640035	709291
2394	sphingomyelin (d18:0/18:0, d19:0/17:0)*	Lipid	Sphingolipid Metabolism	57473	LC/MS Pos Late	100009027	2362	733.622				HMDB12087	1003247	1253165	1019677	967475	1004033	947605	1125772	852371	1377215	1153808
2393	sphingomyelin (d18:0/20:0, d16:0/22:0)*	Lipid	Sphingolipid Metabolism	57476	LC/MS Pos Late	100015786	2600	761.653						393472	121339	318833	143588	147474	236826	172725	664119	299613
2366	sphingomyelin (d18:1/14:0, d16:1/16:0)*	Lipid	Sphingolipid Metabolism	42463	LC/MS Pos Late	100004328	1998	675.544		11433862		HMDB12097	11393726	13151410	9146274	11026278	10781559	6897021	7923318	9161243	11940627	12008926
2370	sphingomyelin (d18:1/17:0, d17:1/18:0, d19:1/16:0)	Lipid	Sphingolipid Metabolism	52615	LC/MS Pos Late	100008920	2312	717.591	121999-64-2				4728636	3820394	4045994	4746857	4631034	3811080	4077474	4121217	5058603	4414718
2371	sphingomyelin (d18:1/18:1, d18:2/18:0)	Lipid	Sphingolipid Metabolism	37529	LC/MS Pos Late	100002106	2167	729.591	108392-10-5	6443882		HMDB12101	4710946	3574452	4438592	4099407	4637283	3.54372e+06	5237392	4376536	3.51501e+06	5354720
2397	sphingomyelin (d18:1/19:0, d19:1/18:0)*	Lipid	Sphingolipid Metabolism	57475	LC/MS Pos Late	100015787	2330	745.622					2426497	3944846	4122125	4974076	3402440	2201982	3414349	3938007	4782218	4895607
2372	sphingomyelin (d18:1/20:0, d16:1/22:0)*	Lipid	Sphingolipid Metabolism	48490	LC/MS Pos Late	100006290	2685	759.638				HMDB12102	10450067	21354856	23927414	27754452	20577748	15746940	26511960	24044160	31635036	26952068
2373	sphingomyelin (d18:1/20:1, d18:2/20:0)*	Lipid	Sphingolipid Metabolism	48491	LC/MS Pos Late	100006292	2383	757.622	222403-67-0				1958011	1640501	2980024	2775092	2809820	2241463	3.23895e+06	2.88923e+06	2351784	3399516
2374	sphingomyelin (d18:1/21:0, d17:1/22:0, d16:1/23:0)*	Lipid	Sphingolipid Metabolism	52495	LC/MS Pos Late	100009025	2793	773.653					11621528	25531832	21750304	26717066	31319484	15111913	29135354	25966126	39564488	32352812
2375	sphingomyelin (d18:1/22:1, d18:2/22:0, d16:1/24:1)*	Lipid	Sphingolipid Metabolism	48493	LC/MS Pos Late	100006295	2666	785.653				HMDB12104	76186320	117718648	131969696	136448448	146046192	111041936	151590880	133284824	181662896	147393728
2392	sphingomyelin (d18:1/22:2, d18:2/22:1, d16:1/24:2)*	Lipid	Sphingolipid Metabolism	57477	LC/MS Pos Late	100006296	2209	783.637					5960579	5345684	6345220	6457019	8357685	6.5352e+06	6924580	6309205	7.70852e+06	7146500
2377	sphingomyelin (d18:1/24:1, d18:2/24:0)*	Lipid	Sphingolipid Metabolism	47153	LC/MS Pos Late	100005986	3033	813.684	94359-13-4			HMDB12107	321831008	485488096	412038688	400094304	475328864	365358560	398569152	364466496	459555744	443207456
2391	sphingomyelin (d18:1/25:0, d19:0/24:1, d20:1/23:0, d19:1/24:0)*	Lipid	Sphingolipid Metabolism	57478	LC/MS Pos Late	100015792	3500	829.716					462638	938110	1120431	991320	1955317	1652382	2234517	1460372	1631482	1144604
2367	sphingomyelin (d18:2/14:0, d18:1/14:1)*	Lipid	Sphingolipid Metabolism	47154	LC/MS Pos Late	100005985	1860	673.528					553933	1027854	568104	693178	735385	408318	663922	524575	1.02879e+06	864047
2369	sphingomyelin (d18:2/16:0, d18:1/16:1)*	Lipid	Sphingolipid Metabolism	42459	LC/MS Pos Late	100004329	2002	701.559					47407232	61618504	53094636	62579368	62534272	47836980	64067668	54296036	64738272	64058324
2396	sphingomyelin (d18:2/18:1)*	Lipid	Sphingolipid Metabolism	57474	LC/MS Pos Late	100015788	1904	727.575					2267558	2.05254e+06	2224191	2173111	2197771	1847574	2707764	2434601	1.71016e+06	2845069
2386	sphingomyelin (d18:2/21:0, d16:2/23:0)*	Lipid	Sphingolipid Metabolism	57480	LC/MS Pos Late	100015790	2330	771.637					7086386	9387540	8888755	10442094	10566890	6457731	7207476	9119513	14377217	10639462
2376	sphingomyelin (d18:2/23:0, d18:1/23:1, d17:1/24:1)*	Lipid	Sphingolipid Metabolism	52435	LC/MS Pos Late	100008956	2845	799.669					67174544	80919664	72168184	67957440	103295016	54215068	70046192	68548864	81035472	95085256
2385	sphingomyelin (d18:2/23:1)*	Lipid	Sphingolipid Metabolism	57482	LC/MS Pos Late	100015791	2315	797.653					4752668	6240695	4251482	6180398	6029661	4288192	4.14242e+06	4288106	6483710	5014252
2378	sphingomyelin (d18:2/24:1, d18:1/24:2)*	Lipid	Sphingolipid Metabolism	52437	LC/MS Pos Late	100008957	2635	811.669					108683576	91391696	98570704	90604256	122347288	87503328	100488056	84058880	81994272	104509008
2388	sphingomyelin (d18:2/24:2)*	Lipid	Sphingolipid Metabolism	57479	LC/MS Pos Late	100015789	2215	809.653					2632613	1.7142e+06	1309359	1417832	1980232	1.93942e+06	1.91498e+06	1261613	1244503	1923240
2381	sphingosine	Lipid	Sphingolipid Metabolism	17747	LC/MS Pos Late	297	1393	300.29	123-78-4	5353955	C00319	HMDB00252	838938	740602	1320108	1285927	610848	589750	832227	954657	1119741	917231
2382	sphingosine 1-phosphate	Lipid	Sphingolipid Metabolism	34445	LC/MS Polar	100000626	1850	378.241	26993-30-6	5283560	C06124	HMDB00277	1254075	1221493	1609567	1594048	1225673	1248251	1104184	1047626	1364927	1.27616e+06
4010	stachydrine	Xenobiotics	Food Component/Plant	34384	LC/MS Pos Early	100001296	1440	144.102	4136-37-2	115244	C10172	HMDB04827	73631144	62691656	53180464	56049604	62744404	63234376	71720800	59600984	64649536	51499648
1165	stearate (18:0)	Lipid	Long Chain Fatty Acid	1358	LC/MS Neg	439	5872	283.264	57-11-4	5281	C01530	HMDB00827	1039453760	1169403264	846841088	922441216	1312439680	962073728	888950720	861608320	876340096	987229632
1197	stearidonate (18:4n3)	Lipid	Polyunsaturated Fatty Acid (n3 and n6)	33969	LC/MS Neg	100001229	5395	275.202	111174-40-4	5312508	C16300	HMDB06547	157107	301222	330881	241549	1451369	717939	316967	215499	478158	413220
1630	stearoyl ethanolamide	Lipid	Endocannabinoid	38625	LC/MS Pos Late	100002254	1787	328.321	111-57-9	27902		HMDB13078	985749	1017315	803076	830007	904105	653497	666521	601887	974047	869367
2361	stearoyl sphingomyelin (d18:1/18:0)	Lipid	Sphingolipid Metabolism	19503	LC/MS Pos Late	1538	2400	731.606	85187-10-6;85187-10-6	6453725	C00550	HMDB01348	7.84112e+06	5787729	7399950	7708825	7.2027e+06	6117559	6998877	7.39965e+06	4713393	7107460
2313	stearoyl-arachidonoyl-glycerol (18:0/20:4) [1]*	Lipid	Diacylglycerol	57450	LC/MS Pos Late	100010949	3404	662.572					187656	163333	143233		171254				464955	193551
2314	stearoyl-arachidonoyl-glycerol (18:0/20:4) [2]*	Lipid	Diacylglycerol	57449	LC/MS Pos Late	100010950	3522	662.572					156076	213628		87880	87582		182162	159057	194808	135447
1412	stearoylcarnitine (C18)	Lipid	Fatty Acid Metabolism(Acyl Carnitine)	34409	LC/MS Pos Late	100001391	1485	428.373	18822-91-8	6426855		HMDB00848	3174090	4178602	3111321	2847353	4565551	4293109	3930532	3817041	4065230	3.81873e+06
1466	stearoylcholine*	Lipid	Fatty Acid Metabolism (Acyl Choline)	57464	LC/MS Pos Late	100015759	1520	370.368					1861149	805719			409836	1284004	456949	487134		657096
1300	suberate (C8-DC)	Lipid	Fatty Acid, Dicarboxylate	15730	LC/MS Polar	100000016	2577.6	173.082	505-48-6	10457	C08278	HMDB00893	667645	571961	512615	452352	441554	509892	619516	429206	577775	462813
1110	succinate	Energy	TCA Cycle	1437	LC/MS Polar	252	3149	117.019	110-15-6	1110	C00042	HMDB00254	119979616	148243824	706046400	727003264	102823536	131798464	149887264	90274984	1211150592	81934048
1109	succinylcarnitine (C4-DC)	Energy	TCA Cycle	37058	LC/MS Pos Early	100001948	2291	262.129	256928-74-2	71464481		HMDB61717	328266	383370	393632	428787	528731	585768	408637	508455	604960	584672
4579	sulfate*	Xenobiotics	Chemical	46960	LC/MS Neg	100002528	616	96.9601	14808-79-8	1118	C00059	HMDB01448	89412264	108148136	88889808	87862248	87677672	118087456	134357440	122960312	83664904	100743656
4142	tartronate (hydroxymalonate)	Xenobiotics	Bacterial/Fungal	20693	LC/MS Neg	100000840	610	118.999	80-69-3	45	C02287	HMDB35227	1896197	2238755	3011064	2776747	1727387	2588479	2622632	2.73814e+06	2.93834e+06	2384751
346	taurine	Amino Acid	Methionine, Cysteine, SAM and Taurine Metabolism	2125	LC/MS Neg	512	690	124.007	107-35-7	1123	C00245	HMDB00251	21310972	17075632	12289497	9955108	18707914	13623382	13250231	14542833	9736023	15322951
2692	tauro-alpha-muricholate	Lipid	Primary Bile Acid Metabolism	42605	LC/MS Neg	100004064	4745	514.284					27401674	349583	249986	510728	84870	488265	136231	399916	1.41522e+06	204822
2693	tauro-beta-muricholate	Lipid	Primary Bile Acid Metabolism	33983	LC/MS Neg	100001250	4774	514.284	25696-60-0	168408		HMDB00932	102128808	979742	1.23743e+06	1047925	736338	1.22946e+06	705069	966572	5509285	1.45632e+06
2689	taurochenodeoxycholate	Lipid	Primary Bile Acid Metabolism	18494	LC/MS Neg	1629	5250	498.289	6009-98-9	387316	C05465	HMDB00951	15036336	100400	103887	197629	51267	202871	78232	210343	423859	79468
2686	taurocholate	Lipid	Primary Bile Acid Metabolism	18497	LC/MS Neg	1648	5150	514.284	145-42-6	6675	C05122	HMDB00036	87530144	1342028	1091865	1.56453e+06	608031	1288660	801471	2215148	6823469	1266060
2706	taurodeoxycholate	Lipid	Secondary Bile Acid Metabolism	12261	LC/MS Neg	1668	5257.4	498.289	207737-97-1	2733768	C05463	HMDB00896	10554690	590179	456359	934471	364946	762415	411516	681685	3123915	428582
2728	taurohyodeoxycholic acid	Lipid	Secondary Bile Acid Metabolism	43588	LC/MS Neg	100003869	5073	498.289	38411-85-7	119046			3112565	173817	150552	167950	109826	133828	118564	216583	143633	194646
2718	tauroursodeoxycholate	Lipid	Secondary Bile Acid Metabolism	39378	LC/MS Neg	100002912	5025	498.289	14605-22-2	9848818		HMDB00874	6621162	141293	143489	180377	52714	124455	74085	89560	831373	87941
1309	tetradecanedioate (C14-DC)	Lipid	Fatty Acid, Dicarboxylate	35669	LC/MS Neg	100001613	4000	257.176	821-38-5	13185		HMDB00872	553157	273950	327847	620828	326979	225093	156381	139941	581191	207343
3559	thiamin (Vitamin B1)	Cofactors and Vitamins	Thiamine Metabolism	44666	LC/MS Neg	873	1726	281.108	59-43-8	1130	C00378	HMDB00235	99838	211680	764124	873854	169303	126219	168587	117603	1536042	83094
4716	thioproline	Xenobiotics	Chemical	53231	LC/MS Pos Early	100009232	1250	134.027	34592-47-4	93176			1.04472e+06	828305	1.98636e+06	2050652	2070307	3170805	4362843	3862317	14386798	3610673
3504	threonate	Cofactors and Vitamins	Ascorbate and Aldarate Metabolism	27738	LC/MS Polar	100001022	2384	135.03	70753-61-6	151152	C01620	HMDB00943	355190592	388466528	532725376	446793664	442614144	640274112	634519616	646350528	484669184	580839680
16	threonine	Amino Acid	Glycine, Serine and Threonine Metabolism	1284	LC/MS Pos Early	564	1514	120.066	72-19-5	6288	C00188	HMDB00167	559708352	553819776	659452224	603421760	608855104	670370560	665303360	702836416	778091328	595137536
3451	thymidine	Nucleotide	Pyrimidine Metabolism, Thymine containing	2183	LC/MS Pos Early	872	1400	243.098	50-89-5	5789	C00214	HMDB00273	1287825	3259605	1533112	1.98765e+06	1849552	3158660	1762410	1.89131e+06	2632088	1271579
3452	thymine	Nucleotide	Pyrimidine Metabolism, Thymine containing	604	LC/MS Neg	882	1654	125.036	65-71-4	1135	C00178	HMDB00262	104005	86054		107995	76611	91558	87286	71987	164922
199	thyroxine	Amino Acid	Tyrosine Metabolism	2761	LC/MS Neg	1094	4808	775.679	51-48-9	5819	C01829	HMDB01918	103829	225987	170606	125606	151272	327768	261454	285552	149323	275972
293	tigloylglycine	Amino Acid	Leucine, Isoleucine and Valine Metabolism	1598	LC/MS Pos Early	1161	1926	158.081	35842-45-6	6441567		HMDB00959	190720	1373088	1496074	2198875	863428	841657	1332978	1285649	3886145	557976
71	trans-urocanate	Amino Acid	Histidine Metabolism	607	LC/MS Pos Early	537	2285	139.05	104-98-3	736715	C00785	HMDB00301	3503818	2303570	3488683	2743738	3273282	2977281	2.82933e+06	3001891	1277986	6281719
1117	tricarballylate	Energy	TCA Cycle	15729	LC/MS Polar	2053	4200	175.025	99-14-9	14925	C19806	HMDB31193	1279313	3937459	4328952	1858631	1331014	37805	1299502	461994	2635341	522191
2363	tricosanoyl sphingomyelin (d18:1/23:0)*	Lipid	Sphingolipid Metabolism	52436	LC/MS Pos Late	100008955	3200	801.684				HMDB12105	26605140	41177776	41308788	38295672	51543328	31489544	37577480	34440768	46108368	53615604
3481	trigonelline (N'-methylnicotinate)	Cofactors and Vitamins	Nicotinate and Nicotinamide Metabolism	32401	LC/MS Pos Early	100001092	1388	138.055	535-83-1	5570	C01004	HMDB00875	71022992	94010592	78224808	82352040	74286336	92712504	93613104	84780480	83666488	61993208
1699	trimethylamine N-oxide	Lipid	Phospholipid Metabolism	40406	LC/MS Pos Early	100003397	2100	76.0757	1184-78-7	1145	C01104	HMDB00925	5400048	26932068	15459214	10909416	11391501	16612819	28940318	33054288	11351910	21768272
4688	trizma acetate	Xenobiotics	Chemical	20710	LC/MS Pos Early	100000856	1884	122.081	6850-28-8	6503	C07182										139458512
203	tryptophan	Amino Acid	Tryptophan Metabolism	54	LC/MS Pos Early	565	2986	205.097	73-22-3	6305	C00078	HMDB00929	431622848	362496768	395719424	391878080	442310720	374662016	214975552	326763904	388805280	364552384
131	tyrosine	Amino Acid	Tyrosine Metabolism	1299	LC/MS Pos Early	815	2430	182.081	60-18-4	6057	C00082	HMDB00158	427063296	270275776	260656256	309375456	266993024	231799120	195364832	203414432	329067936	174143904
3402	uracil	Nucleotide	Pyrimidine Metabolism, Uracil containing	605	LC/MS Pos Early	825	827	113.035	66-22-8	1174	C00106	HMDB00300	1145805	1177104	4460865	5045221	1165909	618076	910556	913517	9739935	457411
3320	urate	Nucleotide	Purine Metabolism, (Hypo)Xanthine/Inosine containing	1604	LC/MS Neg	1134	757.1	167.021	69-93-2;120K5305	1175	C00366	HMDB00289	38324616	31159520	170633392	162317552	25335176	13676147	18247116	15339206	238228000	12387655
355	urea	Amino Acid	Urea cycle; Arginine and Proline Metabolism	1670	LC/MS Pos Early	533	700	121.072	57-13-6	1176	C00086	HMDB00294	320561952	482905472	385679680	403607808	502401824	551419200	427558208	451669088	397103872	508581312
3401	uridine	Nucleotide	Pyrimidine Metabolism, Uracil containing	606	LC/MS Neg	535	1457.6	243.062	58-96-8	6029	C00299	HMDB00296	11611985	14630743	54650188	70298232	10755976	5893156	8452747	11392490	111765600	6613274
2744	ursocholate	Lipid	Secondary Bile Acid Metabolism	57573	LC/MS Neg	100002913	4648	407.28	2955-27-3				4468459	108727	510413	135765	59608	277417	126646	127304	242849	148696
2715	ursodeoxycholate	Lipid	Secondary Bile Acid Metabolism	1605	LC/MS Neg	1135	5055	391.285	128-13-2	31401	C07880	HMDB00946	12964093	1192721	1395295	962297	423282	1738634	438332	436802	969340	1418959
1381	valerylglycine	Lipid	Fatty Acid Metabolism(Acyl Glycine)	36768	LC/MS Neg	100001451	2071	158.082	24003-66-5	4737557		HMDB00927	147563	1256664	1586044	2475694	503308	905861	508488		4284722	264895
304	valine	Amino Acid	Leucine, Isoleucine and Valine Metabolism	1649	LC/MS Pos Early	566	2479	118.086	72-18-4	6287	C00183	HMDB00883	1099030144	1063301568	1012687360	1104416128	1182642048	904498048	896168704	866979840	1321533696	928627968
3312	xanthine	Nucleotide	Purine Metabolism, (Hypo)Xanthine/Inosine containing	3147	LC/MS Neg	1004	910	151.026	69-89-6	1188	C00385	HMDB00292			67666096	53533912					76773600
3314	xanthosine	Nucleotide	Purine Metabolism, (Hypo)Xanthine/Inosine containing	15136	LC/MS Neg	100000299	1075	283.068	146-80-5	64959	C01762	HMDB00299	63019	188780	3261063	5437744	83072	47304	38110	10994	20360580	49359
224	xanthurenate	Amino Acid	Tryptophan Metabolism	15679	LC/MS Pos Early	100000015	2236	206.045	59-007	5699	C02470	HMDB00881	600779	490121	643569	688856	240749	419430	602159	621289	801565	340670
948	xylose	Carbohydrate	Pentose Metabolism	15581	LC/MS Polar	826	1727	195.051	609-06-3	135191	C00181	HMDB00098	5606613	3394274	6.77907e+06	8.35598e+06	3067545	2444505	1621083	2162766	7363595	5323752

## Sheet: ScaledImpData
												SAMPLE NAME	SALK-00500	SALK-00501	SALK-00502	SALK-00503	SALK-00504	SALK-00505	SALK-00506	SALK-00507	SALK-00508	SALK-00509
												CLIENT IDENTIFIER	5P	7P	21P	22P	2P	14P	18P	19P	26P	47P
												PARENT SAMPLE ID	4243052	4243053	4243054	4243055	4243056	4243057	4243058	4243059	4243060	4243061
												CLIENT PATIENT ID	.	.	.	.	.	.	.	.	.	.
												ANIMAL ID	5	7	21	22	2	14	18	19	26	47
												DISEASE	WT	WT	WT	WT	WT	WT	WT	WT	WT	WT
												GENDER	m	m	m	m	m	m	m	m	m	m
												GROUP NUMBER	9	9	9	9	9	10	10	10	10	10
												SAMPLE NUMBER	43	44	45	46	47	48	49	50	51	52
												TREATMENT	CMS121	CMS121	CMS121	CMS121	CMS121	Ctrl	Ctrl	Ctrl	Ctrl	Ctrl
PATHWAY SORTORDER	BIOCHEMICAL	SUPER PATHWAY	SUB PATHWAY	COMP ID	PLATFORM	CHEMICAL ID	RI	MASS	CAS	PUBCHEM	KEGG	Group HMDB	WT CMS	WT CMS	WT CMS	WT CMS	WT CMS	WT CON	WT CON	WT CON	WT CON	WT CON
1	glycine	Amino Acid	Glycine, Serine and Threonine Metabolism	58	LC/MS Pos Early	340	1375	76.0393	56-40-6	750	C00037	HMDB00123	1.3177	0.873	0.8382	0.9834	1.2969	1.3369	1.0492	0.9767	1.3893	0.9947
2	N-acetylglycine	Amino Acid	Glycine, Serine and Threonine Metabolism	27710	LC/MS Polar	100001006	1780	116.035	543-24-8	10972		HMDB00532	0.8389	1.1639	0.959	0.972	1.2238	1.5454	1.2471	0.986	0.9714	0.9521
4	sarcosine	Amino Acid	Glycine, Serine and Threonine Metabolism	1516	LC/MS Pos Early	1023	1280	90.055	107-97-1	1088	C00213	HMDB00271	0.8525	1.1241	1.0977	1.3297	0.9901	0.7378	0.8496	0.8122	1.6367	0.8672
5	dimethylglycine	Amino Acid	Glycine, Serine and Threonine Metabolism	5086	LC/MS Pos Early	806	1104	104.071	1118-68-9	673	C01026	HMDB00092	0.867	1.0643	1.0393	1.0999	0.6695	1.0056	1.1456	1.1993	1.0976	0.9669
6	betaine	Amino Acid	Glycine, Serine and Threonine Metabolism	3141	LC/MS Pos Early	799	1064	118.086	107-43-7	247	C00719	HMDB00043	1.9497	0.6998	1.1027	1.1773	0.901	1.22	1.0055	1.0489	1.459	0.9945
9	serine	Amino Acid	Glycine, Serine and Threonine Metabolism	1648	LC/MS Pos Early	503	1239	106.05	56-45-1	5951	C00065	HMDB00187	1.5848	0.9373	1.0966	1.0835	0.9608	1.0029	1.1118	0.9682	1.1571	0.9971
10	N-acetylserine	Amino Acid	Glycine, Serine and Threonine Metabolism	37076	LC/MS Polar	100001851	2000	146.046	97-14-3	65249		HMDB02931	0.811	0.933	0.9958	1.1426	0.7737	1.6008	1.4071	1.3119	1.175	0.9832
15	2-methylserine	Amino Acid	Glycine, Serine and Threonine Metabolism	53229	LC/MS Pos Early	100009246	1652	120.066		94309	C02115		0.7416	0.9811	1.0304	0.7745	0.915	0.9997	1.1245	1.0986	1.1675	0.9294
16	threonine	Amino Acid	Glycine, Serine and Threonine Metabolism	1284	LC/MS Pos Early	564	1514	120.066	72-19-5	6288	C00188	HMDB00167	0.8875	0.8782	1.0457	0.9569	0.9655	1.063	1.055	1.1145	1.2338	0.9437
17	N-acetylthreonine	Amino Acid	Glycine, Serine and Threonine Metabolism	33939	LC/MS Neg	100001274	821.6	160.062	17093-74-2	152204			0.638	1.0979	0.8511	0.8049	0.9625	1.3889	1.434	1.2833	0.9695	1.16
21	homoserine	Amino Acid	Glycine, Serine and Threonine Metabolism	18351	LC/MS Polar	100000458	2875.8	118.051	672-15-1	12647	C00263	HMDB00719	0.7141	1.4162	0.3563	0.2546	1.3555	0.7874	1.1366	1.5503	0.9042	1.4727
28	alanine	Amino Acid	Alanine and Aspartate Metabolism	1126	LC/MS Pos Early	811	1700	90.055	56-41-7	5950	C00041	HMDB00161	1.1105	0.8748	1.4769	1.3606	1.0781	0.9075	1.1023	1.145	1.6122	0.8788
30	N-acetylalanine	Amino Acid	Alanine and Aspartate Metabolism	1585	LC/MS Polar	1110	1564.8	130.051	97-69-8	88064	C02847	HMDB00766	0.7784	1.1534	0.9326	1.0922	0.6756	0.8873	1.0011	1.1199	0.9989	1.0524
31	N-methylalanine	Amino Acid	Alanine and Aspartate Metabolism	37069	LC/MS Pos Early	100001823	1536	104.071	600-21-5	5288725	C02721	HMDB01906	0.4668	1.5187	1.085	0.9165	0.9608	0.9816	0.7048	0.8247	1.5037	1.0543
34	aspartate	Amino Acid	Alanine and Aspartate Metabolism	443	LC/MS Pos Early	234	1165	134.045	56-84-8	5960	C00049	HMDB00191	2.3022	0.6673	1.634	0.9546	1.1532	1.255	1.1711	0.9342	1.0021	0.9469
35	N-acetylaspartate (NAA)	Amino Acid	Alanine and Aspartate Metabolism	22185	LC/MS Neg	100000787	620.5	174.041	997-55-7;997-55-7	65065	C01042	HMDB00812	0.8921	1.0128	0.9574	1.1415	0.8088	0.8604	0.9611	1.0146	1.0403	0.8829
38	asparagine	Amino Acid	Alanine and Aspartate Metabolism	512	LC/MS Pos Early	917	1225	133.061	70-47-3	6267	C00152	HMDB00168	2.0956	0.8734	1.1128	0.9722	0.9865	1.0135	1.1251	1.0472	1.2283	0.8774
39	N-acetylasparagine	Amino Acid	Alanine and Aspartate Metabolism	33942	LC/MS Polar	100001257	2250	173.057	4033-40-3	99715		HMDB06028	0.9944	1.08	0.9924	1.2778	0.7275	1.1514	1.0056	0.9209	1.8269	0.7181
40	hydroxyasparagine**	Amino Acid	Alanine and Aspartate Metabolism	62060	LC/MS Pos Early	100020205	1149	149.056					0.6079	1.0611	0.9755	0.9103	0.8205	0.9478	1.1154	1.2561	1.0316	1.1652
41	glutamate	Amino Acid	Glutamate Metabolism	57	LC/MS Pos Early	561	1500	148.06	56-86-0	611	C00025	HMDB00148	2.3027	0.8668	1.6069	1.0105	1.2212	0.9047	1.06	0.9513	1.0224	0.8423
42	glutamine	Amino Acid	Glutamate Metabolism	53	LC/MS Pos Early	563	1291	147.076	56-85-9	5961	C00064	HMDB00641	1.0012	0.847	1.167	1.1103	0.7756	0.8827	1.026	1.0166	1.196	0.8369
43	alpha-ketoglutaramate**	Amino Acid	Glutamate Metabolism	62101	LC/MS Polar	100002397	1916	144.03	18465-19-5				1.4584	1.0376	0.9277	0.974	0.6389	0.9287	0.9005	1.0511	0.8628	1.0989
44	N-acetylglutamate	Amino Acid	Glutamate Metabolism	15720	LC/MS Pos Early	100000282	1050	190.071	5817-08-03	70914	C00624	HMDB01138	0.7724	1.4015	1.3455	1.2902	0.9583	0.9162	1.0299	0.9498	1.7817	0.6592
45	N-acetylglutamine	Amino Acid	Glutamate Metabolism	33943	LC/MS Polar	100001253	2140	187.072	2490-97-3	182230	C02716	HMDB06029	0.4446	0.7766	1.0842	1.1907	0.7495	1.5525	1.4188	1.3468	1.4118	0.6588
50	glutamate, gamma-methyl ester	Amino Acid	Glutamate Metabolism	33487	LC/MS Pos Early	100001103	2170	162.076	1499-55-4;1499-55-4	68662		HMDB61715	0.8641	0.8455	1.2475	1.2159	0.8781	1.0129	0.976	0.7829	1.316	0.9552
51	pyroglutamine*	Amino Acid	Glutamate Metabolism	46225	LC/MS Pos Early	100001540	1900	129.066	2353-44-8	134508			0.8241	1.232	1.1437	1.2488	0.7171	0.9377	1.053	1.0871	1.249	0.8681
52	N-acetyl-aspartyl-glutamate (NAAG)	Amino Acid	Glutamate Metabolism	35665	LC/MS Pos Early	100001612	1035	305.098	3106-85-2	5255	C12270	HMDB01067	0.7466	0.8437	1.365	1.0718	0.7775	1.2523	0.7867	1.1246	0.965	0.909
55	carboxyethyl-GABA	Amino Acid	Glutamate Metabolism	40007	LC/MS Pos Early	100003260	2085	176.092	4386-03-02	2572		HMDB02201	0.7289	1.1519	1.1223	1.2372	0.6573	0.8437	0.8113	1.1389	1.9123	1.0852
56	N-methyl-GABA	Amino Acid	Glutamate Metabolism	39577	LC/MS Pos Early	100003152	2109	118.086	1119-48-8	70703	C15987		1.1856	1.0364	1.4083	1.5382	0.8527	0.6221	0.7153	0.6645	3.1808	0.7593
59	S-1-pyrroline-5-carboxylate	Amino Acid	Glutamate Metabolism	42370	LC/MS Pos Early	35	1528	114.055	2906-39-0	1196	C04322	HMDB01301	0.9978	1.0758	0.8703	0.7934	0.9887	1.2148	1.0195	1.2893	0.9	0.7426
60	citramalate	Amino Acid	Glutamate Metabolism	22158	LC/MS Pos Early	100000998	1224	166.071	6236-10-08	1081	C00815	HMDB00426	0.8949	1.5977	1.2905	1.4145	1.1552	0.8825	0.7458	0.7666	2.0717	0.8904
64	histidine	Amino Acid	Histidine Metabolism	59	LC/MS Neg	355	755.9	154.062	5934-29-2	6274	C00135	HMDB00177	1.3777	0.879	0.8527	0.7635	1.0289	1.0479	1.1164	1.0532	0.7846	1.0913
65	1-methylhistidine	Amino Acid	Histidine Metabolism	30460	LC/MS Neg	100001051	1227	168.078	332-80-9	92105	C01152	HMDB00001	0.4554	1.0818	0.7239	0.5041	1.13	0.9724	1.6732	1.327	0.7263	0.8986
66	3-methylhistidine	Amino Acid	Histidine Metabolism	15677	LC/MS Neg	100000042	906.3	168.078	368-16-1	64969	C01152	HMDB00479	0.9178	1.1543	0.83	0.6627	1.6905	1.5124	1.5333	1.4829	0.4561	1.1965
67	N-acetylhistidine	Amino Acid	Histidine Metabolism	33946	LC/MS Neg	100001293	900	196.073	39145-52-3	75619	C02997	HMDB32055	0.5251	1.0545	0.8853	0.7826	1.0995	1.5441	1.2763	1.3261	0.7895	1.0454
68	N-acetyl-3-methylhistidine*	Amino Acid	Histidine Metabolism	43256	LC/MS Neg	100002204	1360	210.088	37841-04-6	193270			0.7249	1.2968	0.7328	0.9636	0.9085	1.4935	1.3783	1.324	1.222	0.8159
69	N-acetyl-1-methylhistidine*	Amino Acid	Histidine Metabolism	43255	LC/MS Pos Early	100004299	2100	212.103		193270			0.4704	1.4461	0.8261	1.002	0.822	1.0323	1.3411	1.8931	1.2238	0.9062
70	hydantoin-5-propionic acid	Amino Acid	Histidine Metabolism	40473	LC/MS Polar	100002514	2080	171.041	5624-26-0	782	C05565	HMDB01212	1.3019	0.9953	1.2624	1.4478	0.6132	1.0951	1.0047	0.9334	0.6393	0.9209
71	trans-urocanate	Amino Acid	Histidine Metabolism	607	LC/MS Pos Early	537	2285	139.05	104-98-3	736715	C00785	HMDB00301	1.2574	0.8267	1.252	0.9846	1.1747	1.0685	1.0154	1.0773	0.4586	2.2543
73	imidazole propionate	Amino Acid	Histidine Metabolism	40730	LC/MS Pos Early	100003434	2263	141.066	1074-59-5	70630		HMDB02271	0.6894	1.1045	2.5545	1.2589	0.8212	1.6285	0.8252	0.7083	2.6427	0.994
74	formiminoglutamate	Amino Acid	Histidine Metabolism	43493	LC/MS Pos Early	100002500	1880	175.071	816-90-0	439233	C00439	HMDB00854	0.7891	0.9113	0.9225	1.0449	1.0103	1.7123	0.9897	0.9731	0.7139	1.0748
75	imidazole lactate	Amino Acid	Histidine Metabolism	15716	LC/MS Pos Early	100000263	2040	157.061	14403-45-3	440129	C05568	HMDB02320	0.5549	0.8706	1.052	1.0258	1.0338	0.9413	1.0457	1.1172	1.3101	0.887
76	carnosine	Amino Acid	Histidine Metabolism	1768	LC/MS Neg	249	804	225.099	305-84-0	439224	C00386	HMDB00033	1.0377	0.6223	1.6777	0.8725	0.9836	1.996	0.9681	1.0614	0.9133	0.8917
78	N-acetylcarnosine	Amino Acid	Histidine Metabolism	43488	LC/MS Neg	100004046	1235	267.11	56353-15-2	9903482		HMDB12881	0.6034	0.937	0.8394	0.9115	0.7417	1.5223	1.5272	1.46	0.8511	1.1341
79	anserine	Amino Acid	Histidine Metabolism	15747	LC/MS Neg	100000044	1124.8	239.115	10030-52-1	112072	C01262	HMDB00194	1.2177	0.8586	1.8328	0.8449	0.9038	1.8537	0.8366	1.1075	0.8824	0.7973
80	histamine	Amino Acid	Histidine Metabolism	1574	LC/MS Pos Early	354	3035	112.087	51-45-6	774	C00388	HMDB00870	1.9418	1.1408	0.2841	0.2841	1.094	0.9701	0.831	1.0126	0.2841	0.9874
81	1-methylhistamine	Amino Acid	Histidine Metabolism	43831	LC/MS Pos Early	100001204	3040	126.103	501-75-7	3614	C05127	HMDB00898	0.7393	1.0078	1.0744	1.8193	0.6608	0.9922	0.6803	1.0885	1.3285	1.0691
82	1-methyl-4-imidazoleacetate	Amino Acid	Histidine Metabolism	32350	LC/MS Pos Early	100001208	2064	141.066	2625-49-2	75810	C05828	HMDB02820	0.8196	0.8283	0.8125	1.0299	0.5139	1.1446	0.9507	0.9838	1.0644	1.0393
83	1-ribosyl-imidazoleacetate*	Amino Acid	Histidine Metabolism	61868	LC/MS Pos Early	100001668	2006	259.092	29605-99-0	5117448	C05131	HMDB02331	0.5963	0.8828	1.3906	1.2607	1.0036	1.1046	0.9964	1.1197	1.4348	0.9681
84	4-imidazoleacetate	Amino Acid	Histidine Metabolism	32349	LC/MS Pos Early	100001207	2055	127.05	645-65-8	96215	C02835	HMDB02024	1.3446	0.8967	1.1538	1.1719	1.0669	0.8862	1.0297	0.9985	1.5059	0.9919
88	N-acetylhistamine	Amino Acid	Histidine Metabolism	48679	LC/MS Pos Early	100006123	2287	154.097	673-49-4	69602	C05135	HMDB13253	0.1385	0.1385	1.4632	0.2894	0.1385	0.6309	1.0605	1.1764	0.5853	1
90	lysine	Amino Acid	Lysine Metabolism	1301	LC/MS Pos Early	407	2850	147.113	56-87-1	5962	C00047	HMDB00182	0.8343	0.953	0.9782	1.0566	1.068	1.0524	1.0558	1.0722	1.3048	0.9916
91	N2-acetyllysine	Amino Acid	Lysine Metabolism	36751	LC/MS Polar	100001721	3372.6	187.109	1946-82-3	92907	C12989	HMDB00446	0.5753	0.5429	0.5429	0.5429	0.7925	2.2047	0.9766	1.3821	0.5429	1.2455
92	N6-acetyllysine	Amino Acid	Lysine Metabolism	36752	LC/MS Polar	100001734	2612.6	187.109	692-04-6	92832	C02727	HMDB00206	0.63	0.9973	0.8022	0.8989	0.8982	1.2224	1.1485	0.8972	1.0027	0.9712
94	N2,N6-diacetyllysine	Amino Acid	Lysine Metabolism	48455	LC/MS Neg	100006124	1604	229.119	499-86-5	91827			0.8972	1.2596	0.9637	1.0358	0.7244	0.9578	0.8365	1.0087	1.0864	0.9365
97	N6,N6,N6-trimethyllysine	Amino Acid	Lysine Metabolism	1498	LC/MS Pos Early	189	2825	189.16	23284-33-5	440120	C03793	HMDB01325	0.6879	0.8677	1.1098	1.1926	0.7214	1.034	0.9434	1.245	1.1994	0.966
98	5-hydroxylysine	Amino Acid	Lysine Metabolism	15685	LC/MS Pos Early	100000054	2790	163.108	13204-98-3	1029	C16741	HMDB00450	0.4787	1.0079	1.3667	1.1252	0.7332	0.7285	1.295	1.4144	1.4494	0.8946
101	2-aminoadipate	Amino Acid	Lysine Metabolism	6146	LC/MS Polar	381	3500	160.062	542-32-5;1118-90-7	469	C00956	HMDB00510	1.1494	0.9757	1.1055	1.0687	0.8849	1.2802	1.5532	1.5233	1.2026	1.2371
103	2-oxoadipate	Amino Acid	Lysine Metabolism	38347	LC/MS Polar	92	2633.1	159.03	3184-35-8	71	C00322	HMDB00225	1.1249	1.713	0.8085	1.7133	0.8906	0.9718	1.4023	0.6	1.7572	0.6253
109	pipecolate	Amino Acid	Lysine Metabolism	1444	LC/MS Pos Early	1025	2200	130.086	4043-87-2	849	C00408	HMDB00070	0.5105	1.1492	1.0522	0.9835	1.0727	0.8649	1.0845	1.2335	1.176	0.9119
110	6-oxopiperidine-2-carboxylate	Amino Acid	Lysine Metabolism	43231	LC/MS Neg	100004499	965	142.051	34622-39-4	3014237		HMDB61705	0.5577	1.0951	0.7207	1.4779	0.9628	1.268	1.1352	1.2253	1.0924	1.1295
113	5-aminovalerate	Amino Acid	Lysine Metabolism	18319	LC/MS Pos Early	100000454	2220	118.086	660-88-8	138	C00431	HMDB03355	2.573	1.017	1.7055	1.2029	0.7298	1.5455	0.5552	0.7024	2.1119	0.78
114	N-trimethyl 5-aminovalerate	Amino Acid	Lysine Metabolism	57687	LC/MS Pos Early	100015962	2186	160.133					0.953	0.855	1.0019	1.1156	0.8176	1.2684	1.1378	0.955	1.1667	1.1404
115	phenylalanine	Amino Acid	Phenylalanine Metabolism	64	LC/MS Pos Early	460	2878	166.086	63-91-2	6140	C00079	HMDB00159	1.5643	0.9931	1.0835	1.1314	1.0665	0.8506	0.8834	0.9035	1.3194	0.9237
116	N-acetylphenylalanine	Amino Acid	Phenylalanine Metabolism	33950	LC/MS Neg	100001256	2597	206.082	2018-61-3	74839	C03519	HMDB00512	2.7128	1.4225	0.9635	1.0796	1.1167	0.9555	0.7617	0.7706	1.4713	0.8318
119	phenylpyruvate	Amino Acid	Phenylalanine Metabolism	566	LC/MS Neg	241	2515	163.04	156-06-9	997	C00166	HMDB00205	1.5805	0.8297	0.9217	0.7399	0.8188	0.6158	1.0001	0.6456	0.786	0.9999
120	phenyllactate (PLA)	Amino Acid	Phenylalanine Metabolism	22130	LC/MS Neg	100000774	2208	165.056	828-01-3	3848	C05607	HMDB00779	1.0559	1.1367	1.5781	1.0308	0.3404	0.5479	1.1625	0.8058	1.2596	0.5775
131	tyrosine	Amino Acid	Tyrosine Metabolism	1299	LC/MS Pos Early	815	2430	182.081	60-18-4	6057	C00082	HMDB00158	1.9746	1.2497	1.2052	1.4305	1.2345	1.0718	0.9033	0.9405	1.5215	0.8052
132	N-acetyltyrosine	Amino Acid	Tyrosine Metabolism	32390	LC/MS Neg	100001104	1680	222.077	537-55-3	68310		HMDB00866	2.53	1.0594	0.882	1.0839	1.149	1.4322	0.9468	1.0351	0.9766	0.6897
139	4-hydroxyphenylpyruvate	Amino Acid	Tyrosine Metabolism	1669	LC/MS Neg	1141	1690	179.035	156-39-8	979	C01179	HMDB00707	1.2976	1.1668	0.8961	0.8742	0.5871	0.787	1.1955	1.007	0.8427	0.8992
142	3-(4-hydroxyphenyl)lactate	Amino Acid	Tyrosine Metabolism	32197	LC/MS Neg	240	1379	181.051	6482-98-0	9378	C03672	HMDB00755	0.9862	1.3257	1.313	1.3683	0.5414	0.8535	1.0138	1.0994	1.2945	0.6751
146	phenol sulfate	Amino Acid	Tyrosine Metabolism	32553	LC/MS Neg	100001510	2156	172.991	937-34-8	74426	C02180	HMDB60015	0.4772	0.872	1.3102	0.9868	0.5244	1.411	1.3785	1.8502	0.0977	1.4622
147	phenol glucuronide	Amino Acid	Tyrosine Metabolism	52747	LC/MS Neg	100006679	1800	269.067	17685-05-1	87235		HMDB60014	0.348	0.8015	1.5679	1.0428	0.216	0.9567	1.6079	2.2446	0.189	1.1715
159	3-methoxytyrosine	Amino Acid	Tyrosine Metabolism	12017	LC/MS Pos Early	1342	2555	212.092	300-48-1	1670		HMDB01434	0.9571	0.848	1.034	0.7307	1.0179	1.4427	1.316	1.1604	0.9765	1.0124
177	homovanillate sulfate	Amino Acid	Tyrosine Metabolism	38349	LC/MS Neg	100002250	1047	261.007	38339-06-9	29981063		HMDB11719	0.6775	1.1018	1.0945	0.7933	0.4146	0.9445	1.1456	1.2549	0.5584	1.3949
181	p-cresol-glucuronide*	Amino Acid	Tyrosine Metabolism	48841	LC/MS Neg	100006191	2420	283.082	17680-99-8	154035		HMDB11686	0.4965	1.0452	0.5823	0.8291	0.9548	6.2442	12.1821	8.3433	0.2964	1.098
183	N-formylphenylalanine	Amino Acid	Tyrosine Metabolism	48433	LC/MS Neg	100006056	2360	192.067	13200-85-6	759256			1.1979	0.9789	2.0632	1.7737	0.8073	0.7742	1.2298	0.9604	2.0115	0.9614
186	4-hydroxycinnamate sulfate	Amino Acid	Tyrosine Metabolism	48410	LC/MS Neg	100006095	1000	242.997	376374-66-2	6070438			1.2227	1.138	1.1422	0.9674	0.4205	1.0712	1.3867	0.5813	0.8466	0.4176
189	indoxyl glucuronide	Amino Acid	Tyrosine Metabolism	52749	LC/MS Neg	100008931	1940	308.078	35804-66-1	2733785		HMDB59804	1.3284	0.7955	0.772	0.6165	0.4493	0.9962	1.3628	2.0767	0.4619	1.0548
199	thyroxine	Amino Acid	Tyrosine Metabolism	2761	LC/MS Neg	1094	4808	775.679	51-48-9	5819	C01829	HMDB01918	0.4624	1.0064	0.7598	0.5594	0.6737	1.4596	1.1643	1.2716	0.665	1.229
203	tryptophan	Amino Acid	Tryptophan Metabolism	54	LC/MS Pos Early	565	2986	205.097	73-22-3	6305	C00078	HMDB00929	1.1678	0.9808	1.0706	1.0603	1.1967	1.0137	0.5816	0.8841	1.0519	0.9863
204	N-acetyltryptophan	Amino Acid	Tryptophan Metabolism	33959	LC/MS Neg	100001254	2630	245.093	1218-34-4	700653	C03137	HMDB13713	2.3176	1.2767	1.304	1.2819	0.7548	1.0398	0.7092	0.991	1.2381	0.8055
210	C-glycosyltryptophan	Amino Acid	Tryptophan Metabolism	48782	LC/MS Neg	100006379	1777	365.135	180509-18-6	10981970			0.7715	0.9896	0.9446	0.7458	0.817	1.0233	1.1672	1.2957	0.8556	1.028
214	kynurenine	Amino Acid	Tryptophan Metabolism	15140	LC/MS Pos Early	100000265	2739	209.092	2922-83-0	161166	C00328	HMDB00684	0.9445	1.3002	0.8016	0.8164	0.926	0.9442	1.0347	1.3064	0.936	1.0139
216	N-acetylkynurenine (2)	Amino Acid	Tryptophan Metabolism	48757	LC/MS Neg	100006378	2378	249.088					1.0212	1.0066	0.8749	0.7877	0.5545	0.9934	1.0845	1.0312	0.8719	0.7787
218	kynurenate	Amino Acid	Tryptophan Metabolism	1417	LC/MS Neg	98	2224	188.035	492-27-3	3845	C01717	HMDB00715	1.0116	0.9884	0.9287	1.0735	0.1934	0.4988	1.087	1.1903	1.0396	0.6819
220	N-formylanthranilic acid	Amino Acid	Tryptophan Metabolism	43549	LC/MS Polar	100004561	900	164.035	3342-77-6	101399	C05653	HMDB04089	1.4227	0.7626	0.5009	0.698	0.432	1.3742	1.0076	1.6453	0.4094	1.3444
221	anthranilate	Amino Acid	Tryptophan Metabolism	57746	LC/MS Pos Early	1258	2606	120.044	118-92-3	227	C00108	HMDB01123	1.4711	1.2114	0.9846	1.5654	0.8492	1.0318	0.9617	1.4655	1.6025	0.9118
224	xanthurenate	Amino Acid	Tryptophan Metabolism	15679	LC/MS Pos Early	100000015	2236	206.045	59-007	5699	C02470	HMDB00881	1.0114	0.8251	1.0834	1.1597	0.4053	0.7061	1.0137	1.0459	1.3494	0.5735
227	serotonin	Amino Acid	Tryptophan Metabolism	2342	LC/MS Pos Early	504	2550	177.102	153-98-0	5202	C00780	HMDB00259	3.1923	0.6598	0.8387	1.0828	0.6546	0.9145	4.257	1.9157	0.3971	1.6273
230	5-hydroxyindoleacetate	Amino Acid	Tryptophan Metabolism	437	LC/MS Neg	71	1510.2	190.051	54-16-0	1826	C05635	HMDB00763	1.0975	1.1044	1.0221	0.7522	0.5403	1.2678	0.8295	1.0793	0.8041	1.1703
234	indolelactate	Amino Acid	Tryptophan Metabolism	18349	LC/MS Pos Early	100000463	2600	206.081	832-97-3	92904	C02043	HMDB00671	1.0197	1.0037	1.1819	1.2737	0.4444	0.6874	1.042	1.159	0.9833	0.8209
235	indoleacetate	Amino Acid	Tryptophan Metabolism	27513	LC/MS Neg	100001034	2200	174.056	6505-45-9	802	C00954	HMDB00197	1.8891	1.2745	1.0739	1.2172	0.4094	0.6895	0.919	0.6833	1.9205	1.0466
237	indolepropionate	Amino Acid	Tryptophan Metabolism	32405	LC/MS Pos Early	100001083	3205	190.086	830-96-6	3744		HMDB02302	0.7836	1.3286	0.8506	1.3996	0.3859	0.5276	0.9524	0.7242	1.6844	0.8017
238	indolepropionylglycine	Amino Acid	Tryptophan Metabolism	54917	LC/MS Neg	100010863	2926	245.093		7677842			0.718	1.3079	1.3049	0.5546	0.8766	0.7528	1.8044	1.2464	1.0209	0.7402
242	indole-3-carboxylic acid	Amino Acid	Tryptophan Metabolism	38116	LC/MS Neg	100002185	1710	160.04	771-50-6	69867	C19837	HMDB03320	0.9997	1.6877	0.4059	0.5707	0.8129	1.7424	0.7409	0.7814	1.3631	0.9708
244	indoleacetylglycine	Amino Acid	Tryptophan Metabolism	54730	LC/MS Neg	100006730	2610	231.078		446640			0.7218	1.0849	0.9844	0.8745	0.3589	1.2748	1.4786	1.0156	1.248	1.7321
247	3-indoxyl sulfate	Amino Acid	Tryptophan Metabolism	27672	LC/MS Neg	100000467	2222.2	212.002	2642-37-7	10258		HMDB00682	0.7794	1.3671	0.9914	0.9282	0.8367	1.2331	1.1588	1.4159	0.6501	1.2207
250	leucine	Amino Acid	Leucine, Isoleucine and Valine Metabolism	60	LC/MS Pos Early	397	2864	132.102	61-90-5	6106	C00123	HMDB00687	1.1924	1.17	1.2741	1.2665	1.3528	0.8702	0.9082	0.9755	1.7007	0.9671
251	N-acetylleucine	Amino Acid	Leucine, Isoleucine and Valine Metabolism	1587	LC/MS Neg	1082	2400	172.098	1188-21-2	70912	C02710	HMDB11756	1.0316	1.6416	1.0125	1.2814	1.0316	0.7234	0.7915	0.9401	2.6261	0.5377
253	4-methyl-2-oxopentanoate	Amino Acid	Leucine, Isoleucine and Valine Metabolism	22116	LC/MS Neg	100000551	2170	129.056	816-66-0	70	C00233	HMDB00695	1.5435	1.195	1.2881	1.2249	0.8688	0.5674	0.624	0.7475	1.307	0.7516
256	alpha-hydroxyisocaproate	Amino Acid	Leucine, Isoleucine and Valine Metabolism	22132	LC/MS Neg	100000706	1840	131.071	10303-64-7	83697	C03264	HMDB00746	0.9948	0.8254	1.3022	1.3524	0.6266	0.7369	0.9946	0.9833	1.1003	0.7916
259	isovalerate (i5:0)	Amino Acid	Leucine, Isoleucine and Valine Metabolism	44656	LC/MS Neg	100000708	1564	101.061	503-74-2	10430	C08262	HMDB00718	3.2844	1	2.6842	3.2466	0.762	0.4551	0.4551	0.4551	3.5177	0.4551
260	isovalerylglycine	Amino Acid	Leucine, Isoleucine and Valine Metabolism	35107	LC/MS Neg	100001452	1950	158.082	16284-60-9	546304		HMDB00678	0.2871	1.654	0.8483	0.8165	0.875	1.5714	1.4591	1.5755	1.0131	0.823
261	isovalerylcarnitine (C5)	Amino Acid	Leucine, Isoleucine and Valine Metabolism	34407	LC/MS Pos Early	100001393	3085	246.17	31023-24-2	6426851		HMDB00688	2.5796	2.2541	0.5445	0.5445	1.3283	0.967	0.5445	0.8663	0.5445	0.8352
267	3-methylcrotonylglycine	Amino Acid	Leucine, Isoleucine and Valine Metabolism	31940	LC/MS Pos Early	100001149	1980	158.081	33008-07-0	169485		HMDB00459	0.415	1.2868	0.8897	1.284	1.1044	1.2793	0.9522	1.1966	1.4204	0.6904
268	beta-hydroxyisovalerate	Amino Acid	Leucine, Isoleucine and Valine Metabolism	12129	LC/MS Neg	1442	1027	117.056	625-08-1	69362		HMDB00754	1.0108	0.8351	1.6337	1.8173	0.8525	0.829	1.0711	0.9892	2.5643	0.6424
271	3-methylglutaconate	Amino Acid	Leucine, Isoleucine and Valine Metabolism	57747	LC/MS Polar	100002458	2700	99.0452	5746-90-7	1551553		HMDB00522	1.2402	1.2881	1.2818	1.1551	0.8018	1.0174	1.2339	0.7519	0.9431	0.8543
284	isoleucine	Amino Acid	Leucine, Isoleucine and Valine Metabolism	1125	LC/MS Pos Early	376	2800	132.102	73-32-5	6306	C00407	HMDB00172	1.1771	1.1368	1.1661	1.1215	1.2328	0.9066	0.878	0.8662	1.3799	0.9821
286	N-acetylisoleucine	Amino Acid	Leucine, Isoleucine and Valine Metabolism	33967	LC/MS Neg	100001276	2325	172.098	3077-46-1	2802421		HMDB61684	0.9991	1.6879	0.8808	1.0571	0.8081	0.7441	0.6637	1.1025	1.5374	0.866
287	3-methyl-2-oxovalerate	Amino Acid	Leucine, Isoleucine and Valine Metabolism	15676	LC/MS Neg	100000036	2064.2	129.056	1460-34-0;51829-07-3	47	C00671	HMDB03736	1.68	1.5398	1.1405	1.1363	1.3026	0.75	0.7363	0.8091	1.1126	0.8286
288	alpha-hydroxyisovalerate	Amino Acid	Leucine, Isoleucine and Valine Metabolism	33937	LC/MS Neg	100001300	1126	117.056	600-37-3	99823		HMDB00407	1.0066	0.9934	0.9535	0.8238	0.9751	0.7933	1.2174	1.175	1.1553	0.9315
290	2-methylbutyrylcarnitine (C5)	Amino Acid	Leucine, Isoleucine and Valine Metabolism	45095	LC/MS Pos Early	100001509	3035	246.17	31023-25-3	6426901		HMDB00378	2.1511	3.0961	2.4857	6.9942	0.722	0.3305	0.2879	0.2351	8.8043	0.5045
291	2-methylbutyrylglycine	Amino Acid	Leucine, Isoleucine and Valine Metabolism	31928	LC/MS Neg	100001155	1884	158.082	52320-67-9	193872		HMDB00339	0.3784	2.5645	1.3888	1.2184	0.5929	0.7705	1.0207	1.191	2.4928	0.6226
293	tigloylglycine	Amino Acid	Leucine, Isoleucine and Valine Metabolism	1598	LC/MS Pos Early	1161	1926	158.081	35842-45-6	6441567		HMDB00959	0.1539	1.1081	1.2073	1.7745	0.6968	0.6792	1.0757	1.0375	3.1361	0.4503
295	3-hydroxy-2-ethylpropionate	Amino Acid	Leucine, Isoleucine and Valine Metabolism	32397	LC/MS Polar	100001170	1443.3	117.056	4374-62-3	188979		HMDB00396	0.9673	1.4665	0.8195	1.015	1.0345	0.6071	0.842	0.9072	1.2274	1.0384
297	ethylmalonate	Amino Acid	Leucine, Isoleucine and Valine Metabolism	15765	LC/MS Polar	2054	2785	131.035	601-75-2	11756		HMDB00622	0.8016	1.0598	1.3429	2.0674	0.5052	0.899	0.997	1.0532	1.3901	0.9207
298	methylsuccinate	Amino Acid	Leucine, Isoleucine and Valine Metabolism	15745	LC/MS Polar	2051	2800	131.035	498-21-5	10349		HMDB01844	0.9034	1.5879	2.373	3.2669	0.6743	0.9864	1.4143	0.791	2.6439	0.621
304	valine	Amino Acid	Leucine, Isoleucine and Valine Metabolism	1649	LC/MS Pos Early	566	2479	118.086	72-18-4	6287	C00183	HMDB00883	1.1028	1.067	1.0162	1.1082	1.1867	0.9076	0.8993	0.87	1.3261	0.9318
305	N-acetylvaline	Amino Acid	Leucine, Isoleucine and Valine Metabolism	1591	LC/MS Neg	1084	1704	158.082	96-81-1	66789		HMDB11757	0.9304	1.4408	1.0731	1.1568	0.6806	0.7462	0.8524	1.1008	1.3686	0.9504
307	3-methyl-2-oxobutyrate	Amino Acid	Leucine, Isoleucine and Valine Metabolism	44526	LC/MS Neg	100000936	1465	115.04	3715-29-5	49	C00141	HMDB00019	1.7385	1.4297	1.1723	1.154	1.4524	0.8824	0.8521	0.7648	0.8358	0.9314
308	2-hydroxy-3-methylvalerate	Amino Acid	Leucine, Isoleucine and Valine Metabolism	36746	LC/MS Neg	100001541	1800	131.071	488-15-3	164623		HMDB00317	0.9306	0.7787	1.2691	1.0458	0.8683	0.7171	0.99	0.9548	1.3871	1.0368
310	isobutyrylcarnitine (C4)	Amino Acid	Leucine, Isoleucine and Valine Metabolism	33441	LC/MS Pos Early	100001055	2810	232.154	25518-49-4	168379		HMDB00736	1.1759	3.0197	3.6278	3.6791	0.5205	0.6731	2.2107	1.0732	3.2209	0.4408
311	isobutyrylglycine	Amino Acid	Leucine, Isoleucine and Valine Metabolism	35437	LC/MS Neg	100001590	1420	144.067	15926-18-8	10855600		HMDB00730	0.4627	1.6148	0.8732	0.5018	0.8806	1.1005	2.1763	1.5151	0.8652	0.7945
312	3-hydroxyisobutyrate	Amino Acid	Leucine, Isoleucine and Valine Metabolism	1549	LC/MS Polar	111	1619	103.04	2068-83-9	87	C06001	HMDB00336	1.411	1.8806	1.4463	1.5777	1.3968	0.5327	0.6277	0.837	1.5055	0.5454
313	2,3-dihydroxy-2-methylbutyrate	Amino Acid	Leucine, Isoleucine and Valine Metabolism	57547	LC/MS Neg	100010869	787	133.051	14868-24-7	301941		HMDB29576	0.7368	1.8554	0.6916	0.8336	0.8294	1.1513	0.7358	0.5543	1.4049	1.0971
316	methionine	Amino Acid	Methionine, Cysteine, SAM and Taurine Metabolism	1302	LC/MS Pos Early	415	2526	150.058	63-68-3	6137	C00073	HMDB00696	1.2222	1.0231	1.0242	1.2616	1.2012	0.9336	0.9393	0.8996	1.0255	0.8008
317	N-acetylmethionine	Amino Acid	Methionine, Cysteine, SAM and Taurine Metabolism	1589	LC/MS Neg	1083	1787	190.054	65-82-7	448580	C02712	HMDB11745	1.1331	1.4285	1.3782	1.3991	1.0421	0.7556	0.9698	0.8973	1.9172	0.6018
318	N-formylmethionine	Amino Acid	Methionine, Cysteine, SAM and Taurine Metabolism	2829	LC/MS Neg	194	1543.8	176.039	4289-98-9	439750	C03145	HMDB01015	0.7038	1.1256	1.244	1.1003	0.7157	0.9821	1.0307	0.9323	1.2929	0.8161
319	S-methylmethionine	Amino Acid	Methionine, Cysteine, SAM and Taurine Metabolism	38127	LC/MS Pos Early	100002183	2555	164.074	3493-12-07	458	C05319	HMDB38670	0.8838	0.3742	1.3972	1.4859	0.5633	4.4139	0.7816	1.3455	1.6762	0.6047
320	methionine sulfone	Amino Acid	Methionine, Cysteine, SAM and Taurine Metabolism	44878	LC/MS Pos Early	100004635	1250	182.048	820-10-0	69961			1.7367	0.9796	0.8148	0.844	1.5994	1.1691	1.0313	0.8623	0.7806	0.9895
321	methionine sulfoxide	Amino Acid	Methionine, Cysteine, SAM and Taurine Metabolism	18374	LC/MS Pos Early	100000039	1272	166.053	3226-65-1	158980	C02989	HMDB02005	1.0833	0.9977	0.9388	1.1489	1.0942	0.8668	1.1348	1.0023	0.8372	0.798
328	S-adenosylhomocysteine (SAH)	Amino Acid	Methionine, Cysteine, SAM and Taurine Metabolism	42382	LC/MS Neg	197	1832.4	383.114	979-92-0	439155	C00021	HMDB00939	1.1194	0.8842	5.1402	12.6668	0.8206	1.6031	0.8604	0.9913	25.2281	0.785
332	cystathionine	Amino Acid	Methionine, Cysteine, SAM and Taurine Metabolism	15705	LC/MS Pos Early	310	2270	223.075	535-34-2	439258	C02291	HMDB00099	0.8756	0.7464	0.9099	1.1162	0.6934	1.0401	1.1552	1.3211	0.9609	1.2044
334	cysteine	Amino Acid	Methionine, Cysteine, SAM and Taurine Metabolism	1868	LC/MS Pos Early	800	1488	122.027	52-90-4;56-89-3	5862	C00097	HMDB00574	0.7382	0.5473	1.0838	1.1758	0.7014	1.0966	1.154	1.1891	3.5799	0.9828
336	S-methylcysteine	Amino Acid	Methionine, Cysteine, SAM and Taurine Metabolism	39592	LC/MS Neg	100002749	880	134.028	1187-84-4	24417		HMDB02108	0.9999	0.6357	0.6357	0.6357	0.8666	1.3703	1.8024	1.3963	0.6357	1.3194
339	cysteine s-sulfate	Amino Acid	Methionine, Cysteine, SAM and Taurine Metabolism	22176	LC/MS Pos Early	100000808	565	201.984	1637-71-4	115015	C05824	HMDB00731	3.2815	1.4668	1.3157	1.0007	0.8043	0.9961	1.121	1.5586	0.5022	0.8775
340	cystine	Amino Acid	Methionine, Cysteine, SAM and Taurine Metabolism	56	LC/MS Pos Early	279	2000	241.031	56-89-3	67678	C00491	HMDB00192	0.7197	0.6574	0.9775	0.6779	0.9321	1.321	1.3816	1.4015	0.7226	1.6004
345	hypotaurine	Amino Acid	Methionine, Cysteine, SAM and Taurine Metabolism	590	LC/MS Polar	358	2763.4	108.012	300-84-5	107812	C00519	HMDB00965	3.7641	0.5508	1.7043	2.0334	1.1615	1.6462	1.4804	0.9722	2.3795	0.6624
346	taurine	Amino Acid	Methionine, Cysteine, SAM and Taurine Metabolism	2125	LC/MS Neg	512	690	124.007	107-35-7	1123	C00245	HMDB00251	1.3037	1.0446	0.7518	0.609	1.1445	0.8334	0.8106	0.8897	0.5956	0.9374
347	N-acetyltaurine	Amino Acid	Methionine, Cysteine, SAM and Taurine Metabolism	48187	LC/MS Neg	100005466	800	166.018		159864			0.7498	1.0701	1.2775	1.6451	0.6859	0.6497	0.8958	1.1797	1.271	0.8668
353	arginine	Amino Acid	Urea cycle; Arginine and Proline Metabolism	1638	LC/MS Pos Early	231	2825	175.119	1119-34-2	232	C00062	HMDB00517	0.944	0.9581	1.0435	1.0856	1.0602	0.9424	1.0353	1.1195	1.336	1.0198
354	argininosuccinate	Amino Acid	Urea cycle; Arginine and Proline Metabolism	15497	LC/MS Pos Early	232	2745	291.13	156637-58-0	828	C03406	HMDB00052	0.7966	1.2904	1.3035	0.9955	0.7046	1.0045	1.1	1.2277	1.1496	0.7416
355	urea	Amino Acid	Urea cycle; Arginine and Proline Metabolism	1670	LC/MS Pos Early	533	700	121.072	57-13-6	1176	C00086	HMDB00294	0.7453	1.1227	0.8967	0.9383	1.168	1.282	0.994	1.0501	0.9232	1.1824
357	ornithine	Amino Acid	Urea cycle; Arginine and Proline Metabolism	1493	LC/MS Pos Early	444	2800	133.097	3184-13-2	6262	C00077	HMDB03374	1.6601	0.8105	1.0647	0.8852	1.2206	1.0312	1.0006	1.236	1.1408	0.8178
360	2-oxoarginine*	Amino Acid	Urea cycle; Arginine and Proline Metabolism	55072	LC/MS Pos Early	100002784	1760	174.087	3715-10-04	558	C03771	HMDB04225	0.6269	0.9358	1.2037	0.9372	0.6145	1.0032	1.1567	1.2818	0.8743	1.2189
361	citrulline	Amino Acid	Urea cycle; Arginine and Proline Metabolism	2132	LC/MS Pos Early	391	1520	176.103	372-75-8	9750	C00327	HMDB00904	1.2126	1.0673	1.0809	0.9245	0.8882	1.1208	0.9529	1.1397	0.8927	1.1082
362	homoarginine	Amino Acid	Urea cycle; Arginine and Proline Metabolism	22137	LC/MS Pos Early	100000961	2882	189.135	156-86-5	9085	C01924	HMDB00670	0.4135	0.955	0.6221	0.4135	1	1.5006	1.0281	1.5077	1.3151	1.2644
363	homocitrulline	Amino Acid	Urea cycle; Arginine and Proline Metabolism	22138	LC/MS Pos Early	100000963	1908	190.119	1190-49-4	65072	C02427	HMDB00679	0.877	1.0908	1.2557	0.786	1.8477	1.5655	1.5076	1.5234	0.9092	1.4954
364	proline	Amino Acid	Urea cycle; Arginine and Proline Metabolism	1898	LC/MS Pos Early	480	1603	116.071	147-85-3	145742	C00148	HMDB00162	1.2804	0.8371	1.1603	1.0228	0.9946	1.0493	1.0623	0.9753	1.2436	0.7137
367	dimethylarginine (SDMA + ADMA)	Amino Acid	Urea cycle; Arginine and Proline Metabolism	36808	LC/MS Pos Early	100001810	2850	203.15	102783-24-4	123831	C03626	HMDB01539	0.9338	0.885	0.9124	0.746	1.0087	1.0305	1.0282	1.3298	1.0688	1.0343
368	N-acetylarginine	Amino Acid	Urea cycle; Arginine and Proline Metabolism	33953	LC/MS Pos Early	100001266	2245	217.13	155-84-0	67427	C02562	HMDB04620	0.8286	0.8945	1.0441	1.186	0.8113	1.2994	0.9161	1.4118	1.1701	0.9063
369	N-acetylcitrulline	Amino Acid	Urea cycle; Arginine and Proline Metabolism	48434	LC/MS Neg	100001577	940	216.099	33965-42-3	656979	C15532	HMDB00856	1.1533	1.4945	1.1629	0.9571	0.9205	1.318	0.9652	1.3472	0.9071	0.9257
371	N-delta-acetylornithine	Amino Acid	Urea cycle; Arginine and Proline Metabolism	43249	LC/MS Neg	100004523	858	173.093		9920500			0.973	1.2651	0.8836	0.6663	1.521	1.027	1.7505	0.6577	0.4414	1.0925
372	N-alpha-acetylornithine	Amino Acid	Urea cycle; Arginine and Proline Metabolism	32984	LC/MS Pos Early	100000285	2000	175.108	6205-08-09	439232	C00437	HMDB03357	0.132	0.7695	1.3756	1.0048	0.5621	1.0045	1.6162	1.0078	1.5084	0.6543
373	N2,N5-diacetylornithine	Amino Acid	Urea cycle; Arginine and Proline Metabolism	43591	LC/MS Neg	100004575	1367	215.104	39825-23-5	10398396			0.9981	1.1873	0.9709	0.8105	1.0013	1.0683	1.4624	1.4071	1.135	0.8362
376	trans-4-hydroxyproline	Amino Acid	Urea cycle; Arginine and Proline Metabolism	32306	LC/MS Pos Early	1001	1064	132.066	51-35-4	5810	C01157	HMDB00725	0.7549	1.01	1.0687	0.9767	0.8744	1.0776	1.3033	1.3359	0.9854	1.1331
378	pro-hydroxy-pro	Amino Acid	Urea cycle; Arginine and Proline Metabolism	35127	LC/MS Pos Early	100001167	2128	229.118	18684-24-7	11673055		HMDB06695	0.5474	1.2386	1.0436	1.1383	0.3896	1.0887	1.3986	1.5326	0.9901	1.0099
381	N-methylproline	Amino Acid	Urea cycle; Arginine and Proline Metabolism	37431	LC/MS Pos Early	100001956	1335	130.086	475-11-6	557			0.8665	2.2739	0.9936	1.1626	0.845	0.7413	0.8528	1.0064	1.5743	0.6851
383	N-monomethylarginine	Amino Acid	Urea cycle; Arginine and Proline Metabolism	43586	LC/MS Pos Early	100004488	2845	189.135	53308-83-1	132862	C03884	HMDB29416	1.0948	0.7043	0.7586	0.3552	1.1346	0.3552	1.0937	0.8208	0.8321	0.3552
384	argininate*	Amino Acid	Urea cycle; Arginine and Proline Metabolism	57461	LC/MS Pos Early	100002769	2150	176.103	157-07-3	160437		HMDB03148	0.4558	1.1847	1.0509	1.3889	0.4772	0.5591	0.8792	1.0645	1.7259	0.8799
387	guanidinoacetate	Amino Acid	Creatine Metabolism	43802	LC/MS Polar	344	2884	116.047	352-97-6	763	C00581	HMDB00128	1.9878	1.0392	1.8343	1.4017	1.2565	0.9752	0.5302	0.5291	1.5479	0.6879
388	creatine	Amino Acid	Creatine Metabolism	27718	LC/MS Pos Early	1221	1947	132.077	57-00-1	586	C00300	HMDB00064	1.0114	0.8845	1.0225	0.936	1.1052	1.0226	0.8812	0.9567	1.2521	0.7204
389	creatinine	Amino Acid	Creatine Metabolism	513	LC/MS Pos Early	275	2055	114.066	60-27-5	588	C00791	HMDB00562	0.8584	0.9748	1.0173	1.019	0.7161	0.9827	1.1321	1.1564	0.9172	1.0422
397	spermidine	Amino Acid	Polyamine Metabolism	485	LC/MS Pos Early	50	3355	146.165	124-20-9	1102	C00315	HMDB01257	1.3998	0.1952	1.0251	0.7172	1.6861	1.091	0.5577	0.6688	1.8032	1.0971
405	5-methylthioadenosine (MTA)	Amino Acid	Polyamine Metabolism	1419	LC/MS Pos Early	212	2752	298.097	2457-80-9	439176	C00170	HMDB01173	0.7601	0.9776	1.0664	1.1216	0.685	0.8812	0.826	1.2697	0.9686	1.0504
406	N-acetylputrescine	Amino Acid	Polyamine Metabolism	37496	LC/MS Pos Early	192	2230	131.118	18233-70-0	122356	C02714	HMDB02064	0.8763	1.1706	1.123	1.2787	0.501	0.9112	0.9922	1.2108	1.3226	0.978
410	4-acetamidobutanoate	Amino Acid	Polyamine Metabolism	1558	LC/MS Pos Early	1113	1350	146.081	3025-96-5	18189	C02946	HMDB03681	0.7797	0.6631	1.0014	1.0386	0.5642	1.1928	1.197	1.2493	0.7785	1.4286
412	(N(1) + N(8))-acetylspermidine	Amino Acid	Polyamine Metabolism	57814	LC/MS Pos Early	100016038	3080	188.176					0.4341	0.8432	1.4617	1.4755	0.6361	1.0577	0.6564	1.5768	2.0231	1.2434
414	4-guanidinobutanoate	Amino Acid	Guanidino and Acetamido Metabolism	15681	LC/MS Pos Early	100000096	2320	146.092	463-003;463-00-3	500	C01035	HMDB03464	0.9582	0.9459	2.8528	2.4345	0.375	0.4724	1.9288	1.0405	5.6093	0.6375
418	glutathione, oxidized (GSSG)	Amino Acid	Glutathione Metabolism	38783	LC/MS Pos Early	448	2667	307.083	103239-24-3	65359	C00127	HMDB03337	0.8053	0.8071	2.514	3.1758	1.1465	1.0867	1.1554	0.8661	5.1965	0.6636
420	cysteine-glutathione disulfide	Amino Acid	Glutathione Metabolism	35159	LC/MS Pos Early	100001437	2465	427.095	13081-14-6	4247235		HMDB00656	0.6861	0.6442	1.8613	1.7172	1.0486	1.0612	0.9827	1.0173	1.9474	0.907
421	S-methylglutathione	Amino Acid	Glutathione Metabolism	33944	LC/MS Neg	100001259	1075	320.092	2922-56-7	3605667	C11347		0.7819	1.1943	2.0538	1.871	1.2255	0.9126	1.1605	0.8707	2.1488	0.6809
424	cysteinylglycine disulfide*	Amino Acid	Glutathione Metabolism	62103	LC/MS Pos Early	100002466	2547	298.053	70555-24-7			HMDB00709	0.626	0.8405	1.2985	1.0044	1.0853	1.23	0.9911	1.0565	1.5028	0.9552
426	5-oxoproline	Amino Acid	Glutathione Metabolism	1494	LC/MS Neg	1021	738.5	128.035	98-79-3	7405	C01879	HMDB00267	1.2354	1.2731	1.0944	0.9823	1.0621	1.2533	1.0056	1.0398	0.9729	0.8975
427	2-aminobutyrate	Amino Acid	Glutathione Metabolism	42374	LC/MS Pos Early	1128	2059	104.071	1492-24-6	439691	C02261	HMDB00650	1.0481	0.9658	1.0511	1.0613	0.9367	1.0199	1.0539	1.0832	1.31	0.846
429	2-hydroxybutyrate/2-hydroxyisobutyrate	Amino Acid	Glutathione Metabolism	52281	LC/MS Polar	100008928	1258	103.04					1.5769	1.5937	1.8949	1.998	1.1093	0.6392	0.6783	0.8957	2.7757	0.8089
431	ophthalmate	Amino Acid	Glutathione Metabolism	34592	LC/MS Pos Early	100001311	2085	290.135	495-27-2	7018721		HMDB05765	0.6494	0.4032	1.941	1.786	1.0064	3.5401	0.9936	0.7689	0.9903	0.3498
905	1,5-anhydroglucitol (1,5-AG)	Carbohydrate	Glycolysis, Gluconeogenesis, and Pyruvate Metabolism	20675	LC/MS Neg	100000580	802	163.061	154-58-5	64960	C07326	HMDB02712	0.947	0.8565	1.0153	0.7687	1.1326	0.9812	1.3393	1.1339	0.9302	0.9847
908	glucose	Carbohydrate	Glycolysis, Gluconeogenesis, and Pyruvate Metabolism	20488	LC/MS Polar	572	2342	179.056	50-99-7	79025	C00031	HMDB00122	0.5895	1.0512	1.5266	1.5337	0.9426	0.8769	0.9835	0.8992	1.7871	0.9618
922	3-phosphoglycerate	Carbohydrate	Glycolysis, Gluconeogenesis, and Pyruvate Metabolism	1414	LC/MS Pos Early	132	590	187	80731-10-8	724	C00597	HMDB00807	2.375	0.3419	1.8433	1.0446	2.427	0.7617	0.6599	1.8109	0.5439	0.5594
924	pyruvate	Carbohydrate	Glycolysis, Gluconeogenesis, and Pyruvate Metabolism	48990	LC/MS Polar	823	1083	87.0088	127-17-3	1060	C00022	HMDB00243	1.1369	1.2059	1.1779	1.0709	1.2485	0.9399	0.8005	0.7441	0.7312	0.7259
925	lactate	Carbohydrate	Glycolysis, Gluconeogenesis, and Pyruvate Metabolism	527	LC/MS Polar	482	1468.8	89.0244	79-33-4	612	C00186	HMDB00190	1.1523	1.3323	2.033	2.0382	1.401	0.6346	0.6198	0.7933	2.3589	0.5362
928	glycerate	Carbohydrate	Glycolysis, Gluconeogenesis, and Pyruvate Metabolism	1572	LC/MS Polar	1052	2070.4	105.019	600-19-1	752	C00258	HMDB00139	0.9302	0.9498	1.0802	0.8802	0.8595	1.116	1.2392	0.9114	0.7311	1.0502
943	ribitol	Carbohydrate	Pentose Metabolism	15772	LC/MS Polar	100000406	1789.6	151.061	488-81-3	6912	C00474	HMDB00508	1.0664	1.4458	1.6412	2.6086	0.8399	0.8669	1.0516	0.6106	3.7835	0.6959
944	ribonate	Carbohydrate	Pentose Metabolism	27731	LC/MS Polar	100001007	2425	165.04	5336-08-03	5460677	C01685	HMDB00867	0.4101	1.0569	0.8431	0.938	0.7915	0.9685	1.0865	0.4723	1.4395	1.2636
948	xylose	Carbohydrate	Pentose Metabolism	15581	LC/MS Polar	826	1727	195.051	609-06-3	135191	C00181	HMDB00098	1.6765	1.015	2.0271	2.4986	0.9173	0.731	0.4847	0.6467	2.2019	1.5919
950	arabinose	Carbohydrate	Pentose Metabolism	575	LC/MS Polar	828	1804.5	195.051	28697-53-2	66308	C00216	HMDB00646	1.0601	0.8996	0.7529	1.9886	0.6965	1.0282	0.913	0.9431	0.9935	1.5355
965	arabitol/xylitol	Carbohydrate	Pentose Metabolism	48885	LC/MS Polar	100006430	1932.4	151.061		6912	C01904		0.9651	0.9403	1.6475	3.2248	0.7359	1.0544	1.1571	0.9314	6.1954	0.8312
967	arabonate/xylonate	Carbohydrate	Pentose Metabolism	48255	LC/MS Polar	100006115	2700	165.04					0.8346	0.7561	1.4663	1.8074	0.7449	0.8255	0.8576	1.0188	2.6902	1.0657
968	sedoheptulose	Carbohydrate	Pentose Metabolism	53237	LC/MS Polar	100002619	2255	209.067	3019-74-7	5459879		HMDB03219	0.6066	0.7476	0.7093	1.0256	0.685	1.2896	0.7665	0.95	1.9916	1.059
969	ribulonate/xylulonate*	Carbohydrate	Pentose Metabolism	61858	LC/MS Polar	100019968	2350	165.04					0.5252	1.0128	1.1626	1.5828	0.9602	0.9744	0.9864	0.5154	0.7302	1.0571
1018	fructose	Carbohydrate	Fructose, Mannose and Galactose Metabolism	577	LC/MS Polar	878	2065	179.056	57-48-7	5984	C00095	HMDB00660	0.8088	1.2319	0.6027	0.4658	1.2432	0.9953	0.9064	0.944	0.2947	1.4935
1023	mannitol/sorbitol	Carbohydrate	Fructose, Mannose and Galactose Metabolism	46142	LC/MS Polar	100001740	2320	181.072		5780	C00794	HMDB00247	0.9725	2.3341	1.3115	0.9387	0.9848	0.8497	0.9841	0.9898	1.6752	1.0102
1024	mannose	Carbohydrate	Fructose, Mannose and Galactose Metabolism	584	LC/MS Polar	803	2200	179.056	3458-28-4	18950	C00159	HMDB00169	0.6382	0.9478	0.9623	1.0307	0.8483	1.0075	1.119	0.9176	1.1554	1.1029
1034	galactitol (dulcitol)	Carbohydrate	Fructose, Mannose and Galactose Metabolism	1117	LC/MS Polar	1003	2360	181.072	608-66-2	11850	C01697	HMDB00107	0.9839	1.7905	1.0039	0.5789	0.7259	1.0688	1.2141	1.1468	0.8769	0.9961
1043	galactonate	Carbohydrate	Fructose, Mannose and Galactose Metabolism	27719	LC/MS Polar	100001026	3085	195.051	299-28-5	128869	C00880	HMDB00565	1.0177	0.9778	1.1308	0.8554	0.705	1.0638	1.2641	0.9823	0.6292	1.2324
1071	glucuronate	Carbohydrate	Aminosugar Metabolism	15443	LC/MS Polar	100000257	3233.3	193.035	207300-70-7	444791	C00191	HMDB00127	0.7855	0.9409	0.8893	0.9283	0.5533	1.2833	1.0647	1.2341	0.6198	0.9507
1082	N-acetylneuraminate	Carbohydrate	Aminosugar Metabolism	32377	LC/MS Polar	1162	3072.6	308.099	131-48-6	439197	C00270	HMDB00230	0.5613	0.9739	1.4326	0.949	0.4592	1.2061	0.871	1.0261	0.7751	1.533
1094	erythronate*	Carbohydrate	Aminosugar Metabolism	42420	LC/MS Polar	100001320	2186	135.03	88759-55-1	2781043		HMDB00613	0.6523	0.8959	0.9936	1.0614	0.6252	1.02	1.0546	1.0611	1.0817	1.0064
1096	N-acetylglucosamine/N-acetylgalactosamine	Carbohydrate	Aminosugar Metabolism	46539	LC/MS Pos Early	100006435	715	222.097		24139		HMDB00215	0.7933	0.8436	1	1.0451	0.6405	1.0396	0.0859	1.0287	1.1188	1.0399
1097	N6-carboxymethyllysine	Carbohydrate	Advanced Glycation End-product	36713	LC/MS Pos Early	100001768	2500	205.118	5746-04-03	123800			0.8169	1.0453	1.3947	1.3736	0.5898	0.6152	0.7587	0.75	1.2294	0.9751
3460	quinolinate	Cofactors and Vitamins	Nicotinate and Nicotinamide Metabolism	1899	LC/MS Polar	182	3000	166.015	89-00-9	1066	C03722	HMDB00232	0.8183	0.9212	0.8398	1.5099	0.8975	1.9295	1.2254	1.3515	0.6687	0.9397
3462	nicotinate ribonucleoside	Cofactors and Vitamins	Nicotinate and Nicotinamide Metabolism	33471	LC/MS Pos Early	100001316	1536	256.082	2625-49-2	161234	C05841	HMDB06809	1.0616	1.4691	2.5878	1.5373	1	0.462	0.6147	0.5299	1.4051	0.3618
3464	nicotinamide	Cofactors and Vitamins	Nicotinate and Nicotinamide Metabolism	594	LC/MS Pos Early	432	1942	123.055	98-92-0	936	C00153	HMDB01406	0.3713	0.862	1.1635	1.1916	0.8456	1.1798	0.7542	1.2099	1.7513	0.664
3467	nicotinamide riboside	Cofactors and Vitamins	Nicotinate and Nicotinamide Metabolism	33013	LC/MS Pos Early	100001310	2040	255.098	1341-23-7	439924	C03150	HMDB00855	0.3349	0.5646	1.444	1.9624	0.3349	0.5457	0.3349	1.1047	0.3349	1.1826
3475	nicotinamide N-oxide	Cofactors and Vitamins	Nicotinate and Nicotinamide Metabolism	39582	LC/MS Pos Early	100002763	877	139.05	1986-81-8	72661		HMDB02730	0.4129	0.975	0.4163	0.3854	1.4987	1.7681	0.9554	1.2838	0.4935	2.0164
3476	1-methylnicotinamide	Cofactors and Vitamins	Nicotinate and Nicotinamide Metabolism	27665	LC/MS Pos Early	55	1940	137.071	1005-24-9	10129985	C02918	HMDB00699	0.305	0.8593	1.4618	1.1664	0.3904	0.5284	0.6571	1.1513	1.197	1.0426
3481	trigonelline (N'-methylnicotinate)	Cofactors and Vitamins	Nicotinate and Nicotinamide Metabolism	32401	LC/MS Pos Early	100001092	1388	138.055	535-83-1	5570	C01004	HMDB00875	0.8846	1.1709	0.9743	1.0257	0.9252	1.1547	1.166	1.0559	1.0421	0.7721
3483	N1-Methyl-2-pyridone-5-carboxamide	Cofactors and Vitamins	Nicotinate and Nicotinamide Metabolism	40469	LC/MS Pos Early	100001468	1250	153.066	701-44-0	69698	C05842	HMDB04193	0.4621	1.1158	0.8561	0.5517	0.9869	0.8914	1.0131	1.3008	0.79	1.3249
3484	N1-Methyl-4-pyridone-3-carboxamide	Cofactors and Vitamins	Nicotinate and Nicotinamide Metabolism	57584	LC/MS Pos Early	100001469	1260	153.066	769-49-3	440810	C05843	HMDB04194	0.3868	1.0215	0.9497	0.7029	1.0687	0.9121	0.9156	1.2197	1.0508	1.1863
3489	flavin adenine dinucleotide (FAD)	Cofactors and Vitamins	Riboflavin Metabolism	2134	LC/MS Neg	327	2425	784.15	146-14-5;84366-81-4	643975	C00016	HMDB01248	0.4855	1.0927	1.0583	0.9015	1.032	0.974	0.9474	1.026	0.8322	0.8283
3491	pantothenate	Cofactors and Vitamins	Pantothenate and CoA Metabolism	1508	LC/MS Neg	1024	1498.7	218.103	137-08-6	6613	C00864	HMDB00210	1.1442	1.1162	0.9657	0.9947	1.2369	0.786	0.7237	0.7505	1.5595	0.7985
3504	threonate	Cofactors and Vitamins	Ascorbate and Aldarate Metabolism	27738	LC/MS Polar	100001022	2384	135.03	70753-61-6	151152	C01620	HMDB00943	0.7148	0.7818	1.0721	0.8992	0.8908	1.2886	1.277	1.3008	0.9754	1.169
3507	oxalate (ethanedioate)	Cofactors and Vitamins	Ascorbate and Aldarate Metabolism	20694	LC/MS Neg	100000841	603	88.988	144-62-7	971	C00209	HMDB02329	0.6753	0.8218	1.11	1.0075	0.6946	0.9925	1.1099	1.1305	1.0166	1.0798
3508	gulonate*	Cofactors and Vitamins	Ascorbate and Aldarate Metabolism	46957	LC/MS Polar	100001586	2750	195.051	20246-53-1	9794176	C00257	HMDB03290	0.3952	0.6914	1.6393	1.8821	0.5348	1.4535	1.2415	1.2476	3.2391	0.7908
3510	alpha-tocopherol	Cofactors and Vitamins	Tocopherol Metabolism	1561	LC/MS Pos Late	1105	2522	430.378	59-02-9;10191-41-0	14985	C02477	HMDB01893	0.8257	1.0747	0.8691	1.0613	0.8194	0.8269	0.6709	0.8981	1.1401	0.8114
3532	dihydrobiopterin	Cofactors and Vitamins	Tetrahydrobiopterin Metabolism	35129	LC/MS Neg	100001506	1552.3	194.068	6779-87-9	1879	C00268	HMDB00038	0.6859	1.0588	1.1298	0.9737	0.7343	1.1101	1.3628	1.0876	1.0263	0.887
3546	heme	Cofactors and Vitamins	Hemoglobin and Porphyrin Metabolism	41754	LC/MS Pos Late	100001386	1124	616.176	14875-96-8	26945	C00032	HMDB03178	2.0881	1.5071	0.5713	0.99	2.18	0.6424	0.9146	0.9961	0.3698	1.2637
3547	bilirubin (Z,Z)	Cofactors and Vitamins	Hemoglobin and Porphyrin Metabolism	43807	LC/MS Neg	1090	4796	583.256	635-65-4	5280352	C00486	HMDB00054	1.7986	1.1393	0.7196	0.6911	1.0161	0.9764	0.8493	0.7948	0.6122	1.2096
3548	bilirubin (E,E)*	Cofactors and Vitamins	Hemoglobin and Porphyrin Metabolism	32586	LC/MS Neg	100001950	4294	583.256	114-25-0	5315454			2.2132	0.6155	0.5875	0.5649	1.4089	1.3577	0.9585	0.903	0.4709	1.1786
3549	bilirubin (E,Z or Z,E)*	Cofactors and Vitamins	Hemoglobin and Porphyrin Metabolism	47886	LC/MS Pos Late	100001951	1265	585.271		5799469		HMDB00488	1.6221	1.0008	0.5966	1.1439	0.738	0.9524	0.5966	0.7385	0.9512	1.196
3550	biliverdin	Cofactors and Vitamins	Hemoglobin and Porphyrin Metabolism	2137	LC/MS Neg	250	4695.6	581.241	55482-27-4;55482-27-4	5353439	C00500	HMDB01008	1.8974	1.0549	0.538	0.5503	1.374	0.9917	0.7742	0.792	0.6146	1.3657
3559	thiamin (Vitamin B1)	Cofactors and Vitamins	Thiamine Metabolism	44666	LC/MS Neg	873	1726	281.108	59-43-8	1130	C00378	HMDB00235	0.493	1.0452	3.7731	4.3149	0.836	0.6232	0.8324	0.5807	7.5846	0.4103
3567	retinol (Vitamin A)	Cofactors and Vitamins	Vitamin A Metabolism	1806	LC/MS Pos Late	498	1636	269.226	68-26-8	445354	C00473	HMDB00305	0.5659	0.9975	1.0908	1.0726	0.9318	0.8081	1.0577	1.23	0.9773	0.9414
3569	carotene diol (1)	Cofactors and Vitamins	Vitamin A Metabolism	57635	LC/MS Pos Late	100015966	1720	568.428					1.2081	0.7817	0.97	0.7803	1.0379	1.7461	1.2494	0.846	0.6423	1.3877
3574	retinal	Cofactors and Vitamins	Vitamin A Metabolism	40807	LC/MS Pos Late	100004088	1666	285.221		638015	C00376	HMDB01358	0.4458	0.4403	0.8135	1.0539	0.93	1.2588	1.262	1.6562	1.2209	0.6291
3586	pyridoxal	Cofactors and Vitamins	Vitamin B6 Metabolism	1651	LC/MS Pos Early	491	2343	168.066	65-22-5	1050	C00250	HMDB01545	1.1951	1.234	0.9832	0.8756	0.9891	0.8273	1	0.8809	1.2843	0.9431
3587	pyridoxate	Cofactors and Vitamins	Vitamin B6 Metabolism	31555	LC/MS Neg	100001121	2185	182.046	82-82-6	6723	C00847	HMDB00017	0.7055	1.0564	1.4942	1.5014	0.3254	0.9173	1.0164	1.003	1.8737	0.9169
1101	citrate	Energy	TCA Cycle	1564	LC/MS Neg	1124	582	191.02	77-92-9	311	C00158	HMDB00094	1.0607	1.0338	0.9983	1.0944	0.9774	0.9457	0.9326	1.0115	1.1488	0.9022
1103	aconitate [cis or trans]	Energy	TCA Cycle	46173	LC/MS Neg	100001359	580	173.009					1.1831	1.1987	0.9892	0.9965	0.9793	1.1336	1.0035	1.1652	0.8329	0.9396
1106	isocitric lactone	Energy	TCA Cycle	54724	LC/MS Polar	100009239	2970	173.009	4702-32-3	98259			0.8735	0.8011	1.2341	1.0362	0.6784	1.2254	1.1536	1.202	0.8027	1.0444
1107	alpha-ketoglutarate	Energy	TCA Cycle	528	LC/MS Polar	93	2700	145.014	305-72-6;328-50-7;22202-68-2	51	C00026	HMDB00208	1.3452	1.3073	1.2958	1.1507	1.1082	0.9282	1.4132	0.7266	1.1095	0.723
1109	succinylcarnitine (C4-DC)	Energy	TCA Cycle	37058	LC/MS Pos Early	100001948	2291	262.129	256928-74-2	71464481		HMDB61717	0.633	0.7393	0.759	0.8268	1.0195	1.1295	0.788	0.9805	1.1665	1.1274
1110	succinate	Energy	TCA Cycle	1437	LC/MS Polar	252	3149	117.019	110-15-6	1110	C00042	HMDB00254	0.8473	1.0469	4.9859	5.1339	0.7261	0.9307	1.0585	0.6375	8.5528	0.5786
1111	fumarate	Energy	TCA Cycle	1643	LC/MS Polar	330	3084	115.004	100-17-8	444972	C00122	HMDB00134	1.1469	1.2721	1.5358	1.3556	0.8971	1.2088	1.5422	0.7489	1.5984	0.6191
1112	malate	Energy	TCA Cycle	1303	LC/MS Neg	409	615.6	133.014	6915-15-7	525	C00149	HMDB00156	1.0276	1.1564	1.341	1.196	0.843	1.0388	1.19	0.8429	1.4715	0.5569
1117	tricarballylate	Energy	TCA Cycle	15729	LC/MS Polar	2053	4200	175.025	99-14-9	14925	C19806	HMDB31193	1.2584	3.8732	4.2583	1.8283	1.3093	0.0372	1.2783	0.4545	2.5923	0.5137
1126	phosphate	Energy	Oxidative Phosphorylation	42109	LC/MS Pos Early	461	576	98.9842	7664-38-2	1061	C00009	HMDB01429	0.73	0.7181	1.1402	1.0912	0.6644	0.9867	1.0133	1.1399	1.3309	1.0921
1128	malonylcarnitine	Lipid	Fatty Acid Synthesis	37059	LC/MS Pos Early	100001526	2086	248.113	853728-01-5	22833583		HMDB02095	0.7087	1.0864	0.8009	1.0341	0.7881	1.0079	0.8111	1.1572	0.9638	0.8529
1129	malonate	Lipid	Fatty Acid Synthesis	15872	LC/MS Polar	818	3447	103.004	141-82-2;26522-22-85-0	867	C00383	HMDB00691	0.7949	1.0534	0.9668	1.1165	0.5787	0.999	1.001	1.0281	0.7116	1.1461
1144	caproate (6:0)	Lipid	Medium Chain Fatty Acid	32489	LC/MS Neg	926	2713.7	115.076	142-62-1	8892	C01585	HMDB00535	0.9836	0.9781	1.5817	5.4146	0.6981	0.9127	1.0164	0.894	2.942	0.925
1150	10-undecenoate (11:1n1)	Lipid	Medium Chain Fatty Acid	32497	LC/MS Neg	100001197	5085.8	183.139	1333-28-4	14891	C13910	HMDB33724	1.2068	0.3996	0.3996	1.1832	1.6471	0.5992	0.7439	0.3996	0.7904	1.4477
1151	laurate (12:0)	Lipid	Medium Chain Fatty Acid	1645	LC/MS Neg	181	5300	199.17	143-07-7	3893	C02679	HMDB00638	1.3011	1.2102	0.9827	1.1476	1.5163	0.8315	0.8613	0.8421	0.8613	0.7891
1154	myristate (14:0)	Lipid	Long Chain Fatty Acid	1365	LC/MS Neg	519	5440	227.202	544-63-8	11005	C06424	HMDB00806	0.8042	1.0723	0.8991	0.9151	1.7164	1.1043	0.7654	0.8059	1.0574	1.0249
1155	myristoleate (14:1n5)	Lipid	Long Chain Fatty Acid	32418	LC/MS Neg	100001198	5346.9	225.186	544-64-9	5281119	C08322	HMDB02000	0.708	0.9048	0.9467	0.7161	2.0332	1.5364	0.8429	0.7634	1.0867	1.3511
1158	pentadecanoate (15:0)	Lipid	Long Chain Fatty Acid	1361	LC/MS Neg	980	5521	241.217	1002-84-2;10002-84-2	13849	C16537	HMDB00826	1.0018	0.9646	0.8647	1.0055	1.2387	0.9981	0.9158	0.9114	1.104	0.9982
1159	palmitate (16:0)	Lipid	Long Chain Fatty Acid	1336	LC/MS Neg	424	5618	255.233	57-10-3	985	C00249	HMDB00220	0.9124	1.1891	0.846	0.9364	1.5757	0.975	0.8821	0.8998	1.025	0.9689
1160	palmitoleate (16:1n7)	Lipid	Long Chain Fatty Acid	33447	LC/MS Neg	452	5475	253.217	373-49-9	445638	C08362	HMDB03229	0.8062	1.2176	0.7953	0.8842	2.1126	1.0586	0.6698	0.6582	1.2871	0.9825
1162	margarate (17:0)	Lipid	Long Chain Fatty Acid	1121	LC/MS Neg	891	5731	269.249	506-12-7	10465		HMDB02259	0.9976	1.1183	0.7284	0.7777	1.7132	1.1603	0.9023	0.8732	0.9072	1.0024
1163	10-heptadecenoate (17:1n7)	Lipid	Long Chain Fatty Acid	33971	LC/MS Neg	100001278	5555	267.233	29743-97-3	5312435		HMDB60038	0.8464	0.9758	0.6894	0.9542	2.2046	1.3773	0.7521	0.8966	1.2633	1.0242
1165	stearate (18:0)	Lipid	Long Chain Fatty Acid	1358	LC/MS Neg	439	5872	283.264	57-11-4	5281	C01530	HMDB00827	1.0538	1.1856	0.8585	0.9352	1.3306	0.9754	0.9012	0.8735	0.8884	1.0009
1167	oleate/vaccenate (18:1)	Lipid	Long Chain Fatty Acid	52285	LC/MS Neg	100008930	5655	281.249					0.8671	1.0223	0.6965	0.8358	1.9707	1.0961	0.687	0.745	1.0326	0.9381
1174	nonadecanoate (19:0)	Lipid	Long Chain Fatty Acid	1356	LC/MS Neg	892	6068	297.28	646-30-0	12591	C16535	HMDB00772	1.4119	1.1128	0.6869	0.7641	2.1323	1.0051	0.8892	1.0072	0.8062	0.9949
1175	10-nonadecenoate (19:1n9)	Lipid	Long Chain Fatty Acid	33972	LC/MS Neg	100001277	5780	295.264	73033-09-7	5312513		HMDB13622	1.1345	1.109	0.7448	0.8072	2.3229	1.0362	0.7294	0.7041	0.9879	1.0423
1178	arachidate (20:0)	Lipid	Long Chain Fatty Acid	1118	LC/MS Neg	893	6240	311.296	506-30-9	10467	C06425	HMDB02212	0.7231	0.9021	0.679	0.9189	1.6485	1.1302	0.7961	0.9824	1.0176	1.2061
1181	eicosenoate (20:1)	Lipid	Long Chain Fatty Acid	33587	LC/MS Neg	100001335	5950	309.28		5282768	C16526	HMDB02231	0.9521	1.0876	0.7148	0.897	2.5276	1.134	0.7356	0.9087	1.139	0.9252
1186	erucate (22:1n9)	Lipid	Long Chain Fatty Acid	1552	LC/MS Neg	1087	6355.6	337.311	112-86-7	5281116	C08316	HMDB02068	0.4512	0.6167	0.4232	0.6663	4.06	1.7456	0.7022	1.3905	0.9923	1.3311
1193	hexadecadienoate (16:2n6)	Lipid	Polyunsaturated Fatty Acid (n3 and n6)	57652	LC/MS Neg	100009394	5398	251.202	28290-73-5			HMDB00477	0.795	0.8978	0.9779	0.84	2.3953	1.6864	0.7936	0.7299	1.2204	1.1593
1194	hexadecatrienoate (16:3n3)	Lipid	Polyunsaturated Fatty Acid (n3 and n6)	57651	LC/MS Neg	100009393	5330	249.186	7561-64-0	5312428			0.8802	1.1599	0.8269	0.9129	2.0659	1.5669	0.8449	0.9174	0.8359	1.0688
1197	stearidonate (18:4n3)	Lipid	Polyunsaturated Fatty Acid (n3 and n6)	33969	LC/MS Neg	100001229	5395	275.202	111174-40-4	5312508	C16300	HMDB06547	0.4223	0.8096	0.8893	0.6492	3.901	1.9297	0.8519	0.5792	1.2852	1.1107
1198	eicosapentaenoate (EPA; 20:5n3)	Lipid	Polyunsaturated Fatty Acid (n3 and n6)	18467	LC/MS Neg	2050	5450	301.217	10-2005-9;10417-94-4	446284	C06428	HMDB01999	0.6384	0.8776	0.6646	0.8317	1.9554	1.0041	0.9248	0.9667	1.4039	1.3911
1199	docosapentaenoate (n3 DPA; 22:5n3)	Lipid	Polyunsaturated Fatty Acid (n3 and n6)	32504	LC/MS Neg	100001181	5571	329.249	2234-74-4	6441454	C16513	HMDB06528	0.521	0.7902	0.6164	0.7881	2.1118	1.0614	0.6479	1.011	1.3874	1.2774
1200	docosahexaenoate (DHA; 22:6n3)	Lipid	Polyunsaturated Fatty Acid (n3 and n6)	44675	LC/MS Neg	100000665	5525	327.233	6217-54-5	445580	C06429	HMDB02183	0.8437	0.7994	0.6381	0.8572	2.2922	1.1949	0.7243	1.0447	1.1375	1.2926
1201	docosatrienoate (22:3n3)	Lipid	Polyunsaturated Fatty Acid (n3 and n6)	32417	LC/MS Neg	100001195	5823	333.28	59708-86-0	5312556	C16534	HMDB02823	1.3378	0.3466	0.3466	0.3466	3.8205	1.8425	0.3466	0.6227	0.3466	1.0604
1204	nisinate (24:6n3)	Lipid	Polyunsaturated Fatty Acid (n3 and n6)	57810	LC/MS Neg	100015785	5657	355.264	68378-49-4	11792612		HMDB02007	1.0282	1.0643	0.611	0.7839	3.1032	1.1789	0.6956	0.9032	1.1046	0.9718
1205	linoleate (18:2n6)	Lipid	Polyunsaturated Fatty Acid (n3 and n6)	1105	LC/MS Neg	180	5535	279.233	60-33-3	5280450	C01595	HMDB00673	0.9859	1.0301	0.6624	0.9751	2.3348	1.2774	0.7929	0.8156	1.0213	0.919
1207	linolenate [alpha or gamma; (18:3n3 or 6)]	Lipid	Polyunsaturated Fatty Acid (n3 and n6)	34035	LC/MS Neg	100001337	5450	277.217		5280934	C06426	HMDB03073	0.6956	0.9778	0.729	1.0099	2.6717	1.567	0.8775	0.7551	1.041	0.9901
1209	dihomo-linolenate (20:3n3 or n6)	Lipid	Polyunsaturated Fatty Acid (n3 and n6)	35718	LC/MS Neg	100001739	5596	305.249	17046-59-2	5280581	C03242	HMDB02925	0.964	0.8863	0.5752	0.6975	1.8342	1.0958	0.7857	1.0339	0.9793	1.1212
1210	arachidonate (20:4n6)	Lipid	Polyunsaturated Fatty Acid (n3 and n6)	1110	LC/MS Neg	229	5535	303.233	506-32-1	444899	C00219	HMDB01043	0.9068	0.7526	0.5794	0.6933	1.8778	1.028	0.8018	1.2015	1.0095	1.1431
1211	adrenate (22:4n6)	Lipid	Polyunsaturated Fatty Acid (n3 and n6)	32980	LC/MS Neg	100001193	5678	331.264	2091-25-0	5497181	C16527	HMDB02226	1.1581	0.9964	1.0082	0.3758	1.5313	0.5256	0.9403	0.557	0.7666	0.9508
1212	docosapentaenoate (n6 DPA; 22:5n6)	Lipid	Polyunsaturated Fatty Acid (n3 and n6)	37478	LC/MS Neg	100001580	5624.5	329.249	25182-74-5	6441454	C16513	HMDB01976	1.1189	0.9839	0.6221	0.6929	2.7422	0.9619	0.6663	1.066	0.9112	1.1584
1213	docosadienoate (22:2n6)	Lipid	Polyunsaturated Fatty Acid (n3 and n6)	32415	LC/MS Neg	100001182	6034	335.296	7370-49-2	5282807	C16533	HMDB61714	1.1384	1.0791	0.7297	0.8348	3.1947	1.3559	0.9794	0.9792	1.1327	0.8787
1214	dihomo-linoleate (20:2n6)	Lipid	Polyunsaturated Fatty Acid (n3 and n6)	17805	LC/MS Neg	1231	5730	307.264	2091-39-6	6439848	C16525	HMDB05060	1.114	1.2138	0.7239	0.7839	2.5001	1.1198	0.7181	0.8471	1.0831	0.9642
1216	mead acid (20:3n9)	Lipid	Polyunsaturated Fatty Acid (n3 and n6)	35174	LC/MS Neg	100001472	5650	305.249	20590-32-3	5312531		HMDB10378	0.9459	0.8722	0.6309	0.7173	1.7509	0.8913	0.5917	0.9787	1.2137	1.1148
1217	docosatrienoate (22:3n6)*	Lipid	Polyunsaturated Fatty Acid (n3 and n6)	57467	LC/MS Neg	100015762	5850	333.28					0.9511	1.0489	0.5303	0.5303	2.8108	0.7109	0.5303	0.7503	1.424	1.0922
1268	13-methylmyristate (i15:0)	Lipid	Fatty Acid, Branched	38293	LC/MS Neg	100002344	5499	241.217	2485-71-4	151014			0.9553	0.7697	0.8613	0.8954	1.4857	1.6382	0.947	0.7234	1.0366	1.7192
1271	15-methylpalmitate (i17:0)	Lipid	Fatty Acid, Branched	38768	LC/MS Neg	100002945	5695	269.249		17903417			1.1121	0.9347	0.7712	0.7989	1.796	1.3396	0.8871	0.9704	1.0296	1.2082
1274	17-methylstearate (i19:0)	Lipid	Fatty Acid, Branched	38296	LC/MS Neg	100002356	5993	297.28	2724-59-6	3083779		HMDB37397	1.2416	1.1293	0.6288	0.6028	2.3888	1.1719	1.0317	0.9627	0.957	1.3035
1284	glutarate (C5-DC)	Lipid	Fatty Acid, Dicarboxylate	396	LC/MS Polar	339	2900	131.035	110-94-1	743	C00489	HMDB00661	1.3443	1.8899	3.0375	3.0515	0.7676	0.846	1.3642	0.7301	2.4094	0.7224
1288	2-hydroxyglutarate	Lipid	Fatty Acid, Dicarboxylate	37253	LC/MS Polar	100002070	3352.8	147.03	40951-21-1	43	C02630	HMDB00606	0.9924	1.4051	1.4284	1.5994	0.8497	1.2271	0.9646	0.687	1.9841	0.6482
1289	4-hydroxy-2-oxoglutaric acid	Lipid	Fatty Acid, Dicarboxylate	40062	LC/MS Polar	100002537	3073	161.009	1187-99-1	599	C01127	HMDB02070	0.9787	1.0487	1.1436	0.9594	1.2836	1.1178	1.3385	0.7615	0.7073	0.8136
1290	adipate (C6-DC)	Lipid	Fatty Acid, Dicarboxylate	21134	LC/MS Polar	100000863	3000	145.051	124-04-9	196	C06104	HMDB00448	1.289	1.7664	2.2479	2.0368	0.9619	0.775	0.7137	0.9342	3.2696	0.7693
1292	2-hydroxyadipate	Lipid	Fatty Acid, Dicarboxylate	31934	LC/MS Polar	100001153	3000	161.046	18294-85-4	193530	C02360	HMDB00321	1.2865	2.3789	1.0631	1.6268	0.4756	1.5564	2.221	0.8953	1.4105	0.8978
1293	3-hydroxyadipate*	Lipid	Fatty Acid, Dicarboxylate	62069	LC/MS Polar	100004396	3131	161.046		151913		HMDB00345	0.6254	1.0071	1.7742	1.6889	0.5158	1.1199	2.2313	0.865	2.1051	0.6636
1294	3-methyladipate	Lipid	Fatty Acid, Dicarboxylate	36749	LC/MS Polar	100001765	2865	159.066	3058-01-03	12292		HMDB00555	0.6154	1.749	1.5103	1.3417	0.3777	0.4083	1.122	0.9698	1.5289	0.657
1296	maleate	Lipid	Fatty Acid, Dicarboxylate	20676	LC/MS Polar	100000707	2640	115.004	110-16-7	444266	C01384	HMDB00176	0.652	0.992	1.6487	1.3134	1.1586	0.7532	1.008	0.9588	1.4959	0.8811
1297	pimelate (C7-DC)	Lipid	Fatty Acid, Dicarboxylate	15704	LC/MS Polar	100000101	2745	159.066	111-16-0	385	C02656	HMDB00857	1.2195	1.282	2.0899	0.8724	0.4654	0.4302	1.8163	0.646	1.3099	0.5122
1300	suberate (C8-DC)	Lipid	Fatty Acid, Dicarboxylate	15730	LC/MS Polar	100000016	2577.6	173.082	505-48-6	10457	C08278	HMDB00893	1.3327	1.1417	1.0232	0.9029	0.8814	1.0178	1.2366	0.8567	1.1533	0.9238
1303	azelate (C9-DC)	Lipid	Fatty Acid, Dicarboxylate	18362	LC/MS Neg	2029	1276	187.098	123-99-9	2266	C08261	HMDB00784	1.4787	1.4081	0.9887	0.9619	1.0113	0.9833	1.3289	0.971	0.7469	1.114
1305	sebacate (C10-DC)	Lipid	Fatty Acid, Dicarboxylate	32398	LC/MS Polar	100001211	2147	201.113	111-20-6	5192	C08277	HMDB00792	1.4116	1.0976	0.9225	0.6564	1.1178	1.0203	0.9065	0.613	0.7755	1.153
1308	dodecanedioate (C12-DC)	Lipid	Fatty Acid, Dicarboxylate	32388	LC/MS Neg	100001102	2990	229.145	693-23-2	12736	C02678	HMDB00623	1.5811	0.2678	0.2678	1.317	0.9546	1	0.2678	0.2678	1.3115	1.0327
1309	tetradecanedioate (C14-DC)	Lipid	Fatty Acid, Dicarboxylate	35669	LC/MS Neg	100001613	4000	257.176	821-38-5	13185		HMDB00872	2.2195	1.0992	1.3154	2.491	1.312	0.9032	0.6275	0.5615	2.3319	0.8319
1310	hexadecanedioate (C16-DC)	Lipid	Fatty Acid, Dicarboxylate	35678	LC/MS Neg	100001614	4615	285.207	505-54-4	10459	C19615	HMDB00672	1.8527	1.1452	1.3684	2.0516	1.0417	0.8145	0.6393	0.5699	2.2916	0.7485
1312	hexadecenedioate (C16:1-DC)*	Lipid	Fatty Acid, Dicarboxylate	61862	LC/MS Neg	100019975	4380	283.191					2.1984	0.7818	1.6792	2.3182	1.2598	0.7348	0.5185	0.4841	2.7258	0.6066
1313	octadecanedioate (C18-DC)	Lipid	Fatty Acid, Dicarboxylate	36754	LC/MS Neg	100001615	5043	313.238	871-70-5	70095		HMDB00782	1.6389	1.2192	1.1024	1.237	0.8957	0.9787	0.9328	0.7518	1.5533	0.8679
1314	octadecenedioate (C18:1-DC)*	Lipid	Fatty Acid, Dicarboxylate	61861	LC/MS Neg	100019978	4875	311.223					1.5205	1.3202	1.4522	1.7895	1.0664	0.9067	0.5428	0.4866	2.0161	0.7279
1315	octadecadienedioate (C18:2-DC)*	Lipid	Fatty Acid, Dicarboxylate	61860	LC/MS Neg	100019982	4676	309.207					2.0446	0.2642	1.1094	1.5873	0.9567	1.123	0.6723	0.2642	1.5775	0.2642
1316	eicosanodioate (C20-DC)	Lipid	Fatty Acid, Dicarboxylate	39831	LC/MS Neg	100002951	5200.9	341.27	2424-92-2	75502			1.3051	1.178	0.7123	1.0341	1.5157	0.8823	0.6709	0.9659	1.0583	0.8737
1356	2-aminooctanoate	Lipid	Fatty Acid, Amino	43343	LC/MS Pos Late	100004227	750	160.133	644-90-6	69522		HMDB00991	0.9847	1.0449	0.9947	1.0115	1.1863	1.2308	1.4412	1.0053	1.2952	1.2455
1359	1-dihomo-linoleoylglycerol (20:2)	Lipid	Fatty Acid, Keto	35103	LC/MS Neg	100001483	6800	307.264					1.3237	3.5612	0.5228	1	0.7988	1.2714	0.5492	0.5803	0.8207	0.9614
1368	butyrylcarnitine (C4)	Lipid	Fatty Acid Metabolism (also BCAA Metabolism)	32412	LC/MS Pos Early	100001054	2860	232.154	25576-40-3	439829	C02862	HMDB02013	1.3477	1.3706	10.0495	14.2159	0.7471	0.7034	0.5509	0.5468	3.8917	0.8956
1369	butyrylglycine	Lipid	Fatty Acid Metabolism (also BCAA Metabolism)	31850	LC/MS Neg	100001151	1470	144.067	20208-73-5	88412		HMDB00808	0.3227	5.1561	4.3515	9.9015	0.3815	1.0177	0.9903	0.9392	5.7742	0.5475
1371	propionylcarnitine (C3)	Lipid	Fatty Acid Metabolism (also BCAA Metabolism)	32452	LC/MS Pos Early	100001162	2590	218.139	17298-37-2	107738	C03017	HMDB00824	2.4006	1.1327	2.4176	2.184	0.9722	1.0278	0.7093	0.5308	4.5429	0.5716
1372	propionylglycine	Lipid	Fatty Acid Metabolism (also BCAA Metabolism)	31932	LC/MS Neg	100001150	960	130.051	21709-90-0	98681		HMDB00783	0.501	1.5168	1.0182	0.8712	1.2054	1.7907	1.1374	1.1884	1.4316	0.8379
1374	methylmalonate (MMA)	Lipid	Fatty Acid Metabolism (also BCAA Metabolism)	1496	LC/MS Polar	418	3078.4	117.019	516-05-2	487	C02170	HMDB00202	0.9882	1.0118	0.9825	0.8646	0.6944	1.2291	1.1232	0.8096	1.5393	0.9267
1379	isocaproylglycine	Lipid	Fatty Acid Metabolism(Acyl Glycine)	61789	LC/MS Neg	100019816	2820	172.098					0.3403	6.0837	3.5294	3.3606	0.3852	0.6249	2.1483	0.784	5.3051	0.3054
1381	valerylglycine	Lipid	Fatty Acid Metabolism(Acyl Glycine)	36768	LC/MS Neg	100001451	2071	158.082	24003-66-5	4737557		HMDB00927	0.2656	2.2623	2.8553	4.4569	0.9061	1.6308	0.9154	0.2656	7.7135	0.4769
1382	hexanoylglycine	Lipid	Fatty Acid Metabolism(Acyl Glycine)	35436	LC/MS Neg	100001527	2900	172.098	24003-67-6	99463		HMDB00701	0.4131	2.8922	5.1515	8.4606	1.0099	1.3001	0.8484	0.4976	6.4349	0.721
1384	heptanoyl glycine	Lipid	Fatty Acid Metabolism(Acyl Glycine)	42629	LC/MS Neg	100004195	3720	186.114	23783-23-5	10932172			0.1021	0.9503	2.8215	2.8414	0.1021	0.1021	0.1485	0.1021	5.7158	0.1021
1386	N-octanoylglycine	Lipid	Fatty Acid Metabolism(Acyl Glycine)	43502	LC/MS Neg	100003940	4335.4	200.129	14246-53-8	84290		HMDB00832	0.3703	2.6373	5.712	8.0568	1.0494	1.1176	1.1602	0.4282	4.4516	0.5734
1387	N-palmitoylglycine	Lipid	Fatty Acid Metabolism(Acyl Glycine)	42092	LC/MS Neg	100003686	5580	312.254	2441-41-0	151008		HMDB13034	0.8612	0.5565	0.5565	0.5565	1.2751	0.5565	0.5565	0.5565	0.9751	0.5565
1395	acetylcarnitine (C2)	Lipid	Fatty Acid Metabolism(Acyl Carnitine)	32198	LC/MS Pos Early	100000802	2282	204.123	5080-50-2	1	C02571	HMDB00201	1.2859	1.1017	1.0988	1.2815	1.1753	0.911	0.9158	0.7816	1.392	0.8354
1397	3-hydroxybutyrylcarnitine (1)	Lipid	Fatty Acid Metabolism(Acyl Carnitine)	43264	LC/MS Pos Early	100003926	2400	248.149		53481617		HMDB13127	1.091	2.2806	5.629	7.6077	0.909	0.6798	0.808	0.4941	9.371	0.566
1398	3-hydroxybutyrylcarnitine (2)	Lipid	Fatty Acid Metabolism(Acyl Carnitine)	52984	LC/MS Pos Early	100009271	2340	248.149				HMDB13127	1.867	1.8386	3.9335	6.8219	1.4983	1.004	0.7296	0.7555	6.9306	0.7295
1400	hexanoylcarnitine (C6)	Lipid	Fatty Acid Metabolism(Acyl Carnitine)	32328	LC/MS Pos Late	100000781	800	260.186	6920-35-0	6426853		HMDB00705	1.1372	2.2642	38.6019	72.0148	0.6867	0.5559	0.7593	0.5084	30.3908	0.6961
1401	octanoylcarnitine (C8)	Lipid	Fatty Acid Metabolism(Acyl Carnitine)	33936	LC/MS Pos Late	100001247	950	288.217	3671-77-0	123701	C02838	HMDB00791	1.113	2.302	17.7992	24.7321	1.0894	1.0655	1.0603	0.6767	10.3618	0.9397
1403	decanoylcarnitine (C10)	Lipid	Fatty Acid Metabolism(Acyl Carnitine)	33941	LC/MS Pos Late	100001251	1130	316.248	1492-27-9	10245190		HMDB00651	0.9474	1.9604	3.2616	5.0651	1.1633	0.9334	0.9094	0.7523	4.7636	0.9953
1405	5-dodecenoylcarnitine (C12:1)	Lipid	Fatty Acid Metabolism(Acyl Carnitine)	61769	LC/MS Pos Late	100016069	1135	342.264					1.1343	1.0054	0.8894	0.912	1.0246	0.9929	1.0425	1.203	1.6344	1.369
1406	cis-4-decenoylcarnitine (C10:1)	Lipid	Fatty Acid Metabolism(Acyl Carnitine)	38178	LC/MS Pos Late	100002259	1057	314.233	98930-66-6				1.2425	1.5331	0.9908	1.0558	1.6971	1.1632	1.0099	0.7144	1.2406	0.9519
1407	laurylcarnitine (C12)	Lipid	Fatty Acid Metabolism(Acyl Carnitine)	34534	LC/MS Pos Late	100001392	1235	344.28	25518-54-1	10427569		HMDB02250	1.9657	1.6663	1.1522	1.4559	1.078	0.8634	0.9984	0.776	2.4474	1.0016
1408	myristoylcarnitine (C14)	Lipid	Fatty Acid Metabolism(Acyl Carnitine)	33952	LC/MS Pos Late	100001270	1350	372.311	18822-89-4	6426854		HMDB05066	1.2376	1.7422	0.8789	0.91	1.2454	0.9678	1.0322	0.9587	1.5743	1.2233
1410	palmitoylcarnitine (C16)	Lipid	Fatty Acid Metabolism(Acyl Carnitine)	44681	LC/MS Pos Late	100000776	1425	400.342	6865-14-1	461	C02990	HMDB00222	1.091	1.2868	0.9321	0.753	1.245	1.0679	1.1576	1.0989	1.1282	1.1438
1411	palmitoleoylcarnitine (C16:1)*	Lipid	Fatty Acid Metabolism(Acyl Carnitine)	53223	LC/MS Pos Late	100009406	1357	398.326		71464547			1.0232	2.1105	0.8327	1.0073	0.967	0.6881	0.997	1.003	2.5354	1.139
1412	stearoylcarnitine (C18)	Lipid	Fatty Acid Metabolism(Acyl Carnitine)	34409	LC/MS Pos Late	100001391	1485	428.373	18822-91-8	6426855		HMDB00848	0.8332	1.0969	0.8167	0.7474	1.1985	1.127	1.0318	1.002	1.0671	1.0024
1413	linoleoylcarnitine (C18:2)*	Lipid	Fatty Acid Metabolism(Acyl Carnitine)	46223	LC/MS Pos Late	100003151	1430	424.342	36816-10-1	6450015		HMDB06469	1.3402	2.2184	0.7637	1.1379	1.33	0.7101	0.907	0.7395	2.4917	0.9263
1414	linolenoylcarnitine (C18:3)*	Lipid	Fatty Acid Metabolism(Acyl Carnitine)	57511	LC/MS Pos Late	100015831	1310	422.326					2.4007	2.5491	1.1023	0.8405	1.8185	0.9866	1.0964	0.5163	2.3055	0.9856
1416	oleoylcarnitine (C18:1)	Lipid	Fatty Acid Metabolism(Acyl Carnitine)	35160	LC/MS Pos Late	100001501	1423	426.358	38677-66-6	6441392		HMDB05065	1.0025	1.5583	0.8551	0.8978	1.1933	0.875	1.0185	1.0405	1.7148	0.9975
1418	myristoleoylcarnitine (C14:1)*	Lipid	Fatty Acid Metabolism(Acyl Carnitine)	48182	LC/MS Pos Late	100006051	1316	370.295	889848-55-9	90659872			1.3045	1.186	0.7201	0.6834	1.2693	0.7893	1.0278	1.0201	1.4579	1.3338
1421	adipoylcarnitine (C6-DC)	Lipid	Fatty Acid Metabolism(Acyl Carnitine)	52988	LC/MS Pos Early	100006614	2558	290.16		71296139		HMDB61677	0.9756	0.5175	1.0913	1.2272	0.9641	1.3216	0.8351	1.1262	1.1401	0.9094
1424	pimeloylcarnitine/3-methyladipoylcarnitine (C7-DC)	Lipid	Fatty Acid Metabolism(Acyl Carnitine)	53224	LC/MS Pos Early	100009407	2773	304.175					0.7406	0.9898	0.6271	0.6271	0.6271	1	0.9034	0.6271	1.2123	0.6271
1427	octadecenedioylcarnitine (C18:1-DC)*	Lipid	Fatty Acid Metabolism(Acyl Carnitine)	61865	LC/MS Pos Late	100005996	1180	456.332	251981-06-3				1.7938	1.0785	0.8358	0.9477	1	1.0312	0.7905	0.7359	2.6915	1.4189
1428	arachidoylcarnitine (C20)*	Lipid	Fatty Acid Metabolism(Acyl Carnitine)	57513	LC/MS Pos Late	100015833	1512	456.405				HMDB06460	0.6717	1.1539	0.6386	0.606	0.9631	1.0888	1.0502	1.0106	1.0618	0.9582
1429	arachidonoylcarnitine (C20:4)	Lipid	Fatty Acid Metabolism(Acyl Carnitine)	57518	LC/MS Pos Late	100015837	1353	448.342					1.748	2.4604	0.7379	1.0109	1.7829	0.9513	0.898	0.7049	1.9379	0.9891
1431	behenoylcarnitine (C22)*	Lipid	Fatty Acid Metabolism(Acyl Carnitine)	57514	LC/MS Pos Late	100015832	1561	484.436					0.7794	0.9378	0.7887	0.6241	1.5593	1.0509	1.306	0.99	1.2722	1.01
1432	dihomo-linolenoylcarnitine (20:3n3 or 6)*	Lipid	Fatty Acid Metabolism(Acyl Carnitine)	57521	LC/MS Pos Late	100015840	1392	450.358					1.9531	2.3966	0.7	1.1615	1.5775	1.1426	0.8436	0.8522	1.7615	0.9417
1433	dihomo-linoleoylcarnitine (C20:2)*	Lipid	Fatty Acid Metabolism(Acyl Carnitine)	57520	LC/MS Pos Late	100015839	1436	452.373					0.3927	3.0151	0.6159	1.1843	0.9544	0.9787	0.7195	1.004	2.7406	0.3927
1434	eicosenoylcarnitine (C20:1)*	Lipid	Fatty Acid Metabolism(Acyl Carnitine)	57519	LC/MS Pos Late	100015838	1484	454.389					0.7182	2.0304	0.6217	1.1232	0.8355	0.8986	0.7756	1	2.3266	0.5304
1441	lignoceroylcarnitine (C24)*	Lipid	Fatty Acid Metabolism(Acyl Carnitine)	57515	LC/MS Pos Late	100015834	1603	512.467					0.8872	1.0556	0.7988	0.8688	1.2579	0.9343	1.099	1.0018	1.0909	0.9982
1442	margaroylcarnitine (C17)*	Lipid	Fatty Acid Metabolism(Acyl Carnitine)	57512	LC/MS Pos Late	100004054	1424	414.358	106182-29-0			HMDB06210	0.6774	1.4288	0.736	0.7966	1.0642	0.9808	0.942	1.0793	1.3863	0.9713
1443	nervonoylcarnitine (C24:1)*	Lipid	Fatty Acid Metabolism(Acyl Carnitine)	57531	LC/MS Pos Late	100015846	1602	510.452					1.002	0.9267	0.6403	0.6663	1.3767	1.0063	1.2355	1.1468	0.9214	0.9898
1446	pentadecanoylcarnitine (C15)*	Lipid	Fatty Acid Metabolism(Acyl Carnitine)	57522	LC/MS Pos Late	100015842	1362	386.326					1.0322	1.6306	0.7332	0.7827	1.0055	0.9664	0.9	1.1461	1.6158	1.4791
1451	deoxycarnitine	Lipid	Carnitine Metabolism	36747	LC/MS Pos Early	100001662	2052	146.118	6249-56-5	134	C01181	HMDB01161	1.7473	1.0803	1.1821	1.2968	1.0551	0.9284	0.8812	0.7167	1.5836	0.8881
1452	carnitine	Lipid	Carnitine Metabolism	15500	LC/MS Pos Early	100000007	1978	162.112	461-05-2	10917	C00318	HMDB00062	1.3858	1.0061	0.8188	0.7925	1.038	1.2609	1.0761	0.9437	0.8945	1.171
1457	3-hydroxybutyrate (BHBA)	Lipid	Ketone Bodies	542	LC/MS Polar	254	1444	103.04	625-72-9	441	C01089	HMDB00357	0.9064	2.3038	1.734	2.4526	0.8805	0.3486	0.8363	0.8407	1.3755	0.6626
1460	palmitoylcholine	Lipid	Fatty Acid Metabolism (Acyl Choline)	52944	LC/MS Pos Late	100009233	1482	342.337		151731			2.6065	1.3029	0.0956	0.0956	0.9208	2.1589	1.1223	1.1323	0.4167	1.3137
1461	oleoylcholine	Lipid	Fatty Acid Metabolism (Acyl Choline)	53260	LC/MS Pos Late	100009331	1449	368.352					4.2539	1.4761	0.4527	0.4527	1.0105	2.6923	0.9895	1.3363	0.4527	1.8777
1464	linoleoylcholine*	Lipid	Fatty Acid Metabolism (Acyl Choline)	57463	LC/MS Pos Late	100015760	1388	366.337					3.9244	1.5159	0.0664	0.0664	1	2.3391	1.0658	0.9513	0.0664	1.4307
1466	stearoylcholine*	Lipid	Fatty Acid Metabolism (Acyl Choline)	57464	LC/MS Pos Late	100015759	1520	370.368					3.9428	1.7069	0.3105	0.3105	0.8682	2.7201	0.968	1.032	0.3105	1.392
1467	docosahexaenoylcholine	Lipid	Fatty Acid Metabolism (Acyl Choline)	53263	LC/MS Pos Late	100009333	1378	414.337					2.2097	0.9428	0.3139	0.3139	0.9795	1.6846	1.1773	1.1802	0.3139	1.6315
1468	arachidonoylcholine	Lipid	Fatty Acid Metabolism (Acyl Choline)	53261	LC/MS Pos Late	100009332	1390	390.337					2.5875	1.0375	0.3113	0.3113	0.9532	1.7292	0.9625	1.0504	0.3113	1.4428
1471	4-hydroxybutyrate (GHB)	Lipid	Fatty Acid, Monohydroxy	34585	LC/MS Pos Early	100001507	1148	87.0441	502-85-2	10413	C00989	HMDB00710	0.8513	0.6568	5.0499	17.2044	1.2814	1	0.6568	0.6568	17.299	0.6568
1474	2-hydroxyoctanoate	Lipid	Fatty Acid, Monohydroxy	22036	LC/MS Neg	100000743	3736.8	159.103	617-73-2	94180		HMDB02264	1.4897	0.9039	1.1573	0.9132	1.1855	0.7846	0.9428	0.8263	1.5134	1.1001
1475	2-hydroxydecanoate	Lipid	Fatty Acid, Monohydroxy	42489	LC/MS Neg	100004089	4840	187.134	5393-81-7	21488			1.4554	1.0045	0.6253	0.8114	2.1566	1.3495	1.1431	0.9448	0.9826	0.9955
1480	2-hydroxypalmitate	Lipid	Fatty Acid, Monohydroxy	35675	LC/MS Neg	100001579	5511.2	271.228	764-67-0	92836		HMDB31057	1.3216	0.8641	0.6696	0.9677	1.0802	1.0669	0.6955	1.018	1.0203	1.0705
1482	2-hydroxystearate	Lipid	Fatty Acid, Monohydroxy	17945	LC/MS Neg	1239	5695	299.259	629-22-1	69417	C03045		2.1755	1.0307	0.6683	0.5812	1.1697	0.8857	0.9406	0.8793	0.7521	1.4874
1488	3-hydroxyhexanoate	Lipid	Fatty Acid, Monohydroxy	53230	LC/MS Neg	100006367	1725	131.071	10191-24-9	151492			1.7721	1.7406	4.5261	8.8267	1.0013	0.4959	0.694	0.9237	6.8101	1.9784
1489	3-hydroxyoctanoate	Lipid	Fatty Acid, Monohydroxy	22001	LC/MS Neg	100000773	3446	159.103	88930-08-9	26613		HMDB01954	1.2451	1.5694	1.8372	2.8255	1.7562	0.5752	0.6946	0.7071	2.8719	1.0142
1490	3-hydroxydecanoate	Lipid	Fatty Acid, Monohydroxy	22053	LC/MS Neg	100000997	4634.7	187.134	5561-87-5	26612		HMDB02203	0.8133	1.7184	1.8803	2.0391	2.3784	0.6611	0.5625	0.7058	2.7915	0.7632
1492	3-hydroxysebacate	Lipid	Fatty Acid, Monohydroxy	31943	LC/MS Neg	100001145	1282	217.108	73141-46-5	3017884		HMDB00350	1.1585	1.6408	1.2707	0.8655	1.1007	0.8082	0.6006	0.97	1.3395	0.9784
1493	3-hydroxylaurate	Lipid	Fatty Acid, Monohydroxy	32457	LC/MS Neg	100001112	5175	215.165	53941-38-1	94216		HMDB00387	0.8413	1.6608	2.5989	3.2612	2.943	0.9606	0.3434	0.7433	5.0531	0.6902
1496	3-hydroxypalmitate	Lipid	Fatty Acid, Monohydroxy	27503	LC/MS Neg	100000983	5476	271.228	928-17-6	301590		HMDB10734	0.9202	0.9773	1.1485	2.0832	1.3234	1.432	0.6929	0.8556	3.3022	0.9148
1498	5-hydroxyhexanoate	Lipid	Fatty Acid, Monohydroxy	31938	LC/MS Neg	100001148	1267	131.071	44843-89-2	170748		HMDB00525	1.0702	1.3822	1.6898	2.3722	0.5168	0.9248	0.7739	0.7851	3.1507	0.9459
1505	16-hydroxypalmitate	Lipid	Fatty Acid, Monohydroxy	39609	LC/MS Neg	100002953	5236.2	271.228	506-13-8	10466	C18218	HMDB06294	0.9032	0.8774	1.02	1.0327	1.1087	1.015	0.985	0.9067	1.0982	0.7523
1509	13-HODE + 9-HODE	Lipid	Fatty Acid, Monohydroxy	37752	LC/MS Neg	100002196	5275	295.228		43013			1.0545	0.9455	0.8872	1.368	2.0018	1.6162	1.3481	0.8205	0.4797	0.8348
1524	3-hydroxystearate	Lipid	Fatty Acid, Monohydroxy	52938	LC/MS Neg	100008933	5674	299.259	45261-96-9	5282907			0.84	1.0244	0.6484	1.0781	1.2295	1.0631	0.7221	0.6333	1.7063	0.7066
1533	12,13-DiHOME	Lipid	Fatty Acid, Dihydroxy	38395	LC/MS Neg	62	5137	313.238	263399-35-5	10236635	C14829	HMDB04705	1.3505	0.9501	0.7862	1.579	1.6801	1.2368	1.5402	0.6387	0.7043	0.9267
1534	9,10-DiHOME	Lipid	Fatty Acid, Dihydroxy	38399	LC/MS Neg	179	5180	313.238	263399-34-4	9966640	C14828	HMDB04704	1.0341	0.9463	0.5166	1.2645	1.3895	1.2287	0.8964	0.7965	0.7254	0.8303
1613	12-HETE	Lipid	Eicosanoid	37536	LC/MS Neg	100002167	5326	319.228	71030-37-0;73837-14-6	5312983		HMDB06111	2.9272	1.4127	0.8299	1.0789	3.1758	0.689	1.2947	0.8505	0.9236	0.6093
1626	oleoyl ethanolamide	Lipid	Endocannabinoid	38102	LC/MS Neg	1137	6450	324.291	11-58-0;111-58-0	5283454		HMDB02088	0.9148	0.8453	0.5725	1.1231	1.141	0.8761	0.4585	0.9635	1.3948	1.0365
1629	palmitoyl ethanolamide	Lipid	Endocannabinoid	38165	LC/MS Neg	1489	6300	298.275	544-31-0	4671	C16512	HMDB02100	0.8149	0.9285	0.6099	1.1835	1.2614	1.0715	0.5406	1.0898	1.3242	0.8401
1630	stearoyl ethanolamide	Lipid	Endocannabinoid	38625	LC/MS Pos Late	100002254	1787	328.321	111-57-9	27902		HMDB13078	1.1809	1.2187	0.962	0.9943	1.0831	0.7828	0.7984	0.721	1.1668	1.0414
1638	N-oleoyltaurine	Lipid	Endocannabinoid	39732	LC/MS Neg	100003119	5610	388.253	52514-04-2	6437033			1.5865	1.1909	1.3578	1.7655	1.1526	0.8532	0.7202	0.6896	1.922	0.9747
1639	N-stearoyltaurine	Lipid	Endocannabinoid	39730	LC/MS Neg	100003240	5782	390.268	63155-80-6	168274			1.6074	0.9418	0.9975	1.0148	1.3661	0.9161	0.7594	0.8368	1.3864	1.1916
1640	N-palmitoyltaurine	Lipid	Endocannabinoid	39835	LC/MS Neg	100003239	5560	362.237	83982-06-3				1.852	0.9214	1.3013	1.3187	1.1078	0.6503	0.6956	0.6069	1.588	0.8918
1642	N-linoleoyltaurine*	Lipid	Endocannabinoid	61826	LC/MS Neg	100005814	5505	386.237					1.4768	0.8042	1.3849	2.1678	1.1499	0.7327	0.6142	0.6987	2.4704	0.8181
1644	linoleoyl ethanolamide	Lipid	Endocannabinoid	52608	LC/MS Neg	100006726	6150	322.275	68171-52-8	5283446		HMDB12252	1.1693	1.1223	0.7677	1.0076	1.0403	0.8725	0.6436	0.9235	1.2457	1.1184
1659	myo-inositol	Lipid	Inositol Metabolism	1124	LC/MS Polar	363	3506.3	225.062	87-89-8	892	C00137	HMDB00211	0.7643	1.2145	0.779	1.2195	0.5899	1.0912	1.1342	0.6832	1.0616	1.132
1660	chiro-inositol	Lipid	Inositol Metabolism	37112	LC/MS Polar	100001859	3191.2	225.062	643-12-9		C19891	HMDB34220	0.9748	1.1777	0.9655	1.1844	0.7768	1.116	1.0535	0.8546	0.8984	0.7768
1688	choline	Lipid	Phospholipid Metabolism	15506	LC/MS Pos Early	1256	1961	104.107	67-48-1	305	C00114	HMDB00097	1.3473	1.1505	1.2662	1.3643	0.9324	0.8876	0.9442	1.0488	2.318	0.8923
1689	choline phosphate	Lipid	Phospholipid Metabolism	34396	LC/MS Pos Early	267	700	184.073	72556-74-2	1014	C00588	HMDB01565	0.6084	0.7759	1.6787	1.8594	0.8702	1.0893	0.6739	1.0051	2.1604	0.8819
1692	glycerophosphorylcholine (GPC)	Lipid	Phospholipid Metabolism	15990	LC/MS Pos Early	100000269	672	258.11	28319-77-9	71920	C00670	HMDB00086	1.016	1.2966	0.8117	0.7002	1.4974	1.1238	0.6705	0.984	0.6223	1.038
1694	phosphoethanolamine	Lipid	Phospholipid Metabolism	1600	LC/MS Neg	1026	638	140.012	1071-23-4	1015	C00346	HMDB00224	1.1584	1.1006	0.5428	0.8717	1.0085	1.0752	0.8339	0.8343	0.5551	1.0639
1696	glycerophosphoethanolamine	Lipid	Phospholipid Metabolism	37455	LC/MS Polar	100001620	3075	214.049	33049-08-0	123874	C01233	HMDB00114	1.6199	1.3459	0.9349	0.6189	1.512	1.2783	1.1372	0.6943	0.4482	1.0503
1699	trimethylamine N-oxide	Lipid	Phospholipid Metabolism	40406	LC/MS Pos Early	100003397	2100	76.0757	1184-78-7	1145	C01104	HMDB00925	0.2704	1.3485	0.7741	0.5462	0.5704	0.8318	1.4491	1.6551	0.5684	1.09
1717	1-myristoyl-2-palmitoyl-GPC (14:0/16:0)	Lipid	Phosphatidylcholine (PC)	19258	LC/MS Pos Late	100000672	2147	706.538	69525-80-0	129657		HMDB07869	1.1017	1.4265	0.9653	0.8903	0.8936	1.0524	1.0422	0.7824	1.143	0.9074
1721	1-myristoyl-2-arachidonoyl-GPC (14:0/20:4)*	Lipid	Phosphatidylcholine (PC)	53195	LC/MS Pos Late	100009139	1914	754.538				HMDB07883	0.6788	1.0836	1.0433	1.0216	1.2504	0.8812	0.8646	0.9895	1.1447	1.0781
1731	1,2-dipalmitoyl-GPC (16:0/16:0)	Lipid	Phosphatidylcholine (PC)	19130	LC/MS Pos Late	100000657	2365	734.569	63-89-8	452110		HMDB00564	1.0344	1.1714	1.0359	1.0514	0.9474	0.8356	1.0183	0.975	0.9817	0.8972
1732	1-palmitoyl-2-palmitoleoyl-GPC (16:0/16:1)*	Lipid	Phosphatidylcholine (PC)	52470	LC/MS Pos Late	100008984	2160	732.554				HMDB07969	0.842	1.3276	1.0195	1.0393	0.7148	0.7297	1.0089	0.8821	1.29	1.0074
1733	1-palmitoyl-2-stearoyl-GPC (16:0/18:0)	Lipid	Phosphatidylcholine (PC)	52616	LC/MS Pos Late	100008921	2653	762.601	59403-51-9			HMDB07970	0.6747	1.7065	0.9154	1.2231	0.913	0.6536	0.8531	0.7769	1.2838	0.7924
1735	1-palmitoyl-2-oleoyl-GPC (16:0/18:1)	Lipid	Phosphatidylcholine (PC)	52461	LC/MS Pos Late	1539	2358	760.585	26853-31-6;26853-31-6	6436017		HMDB07972	0.8332	1.1949	0.9997	1.0978	0.7961	0.7775	1.0003	0.9583	1.1514	1.0089
1738	1-palmitoyl-2-linoleoyl-GPC (16:0/18:2)	Lipid	Phosphatidylcholine (PC)	42446	LC/MS Pos Late	1537	2160	758.569	40811-94-7	5287971		HMDB07973	0.8714	1.015	0.9986	1.0281	0.9356	0.8747	0.9845	0.8447	1.1143	0.9373
1741	1-palmitoyl-2-gamma-linolenoyl-GPC (16:0/18:3n6)*	Lipid	Phosphatidylcholine (PC)	54812	LC/MS Pos Late	100009154	2034	756.554				HMDB07974	0.7548	1.2557	1.0002	1.1453	0.9041	0.8262	0.9487	0.691	1.337	0.9078
1744	1-palmitoyl-2-dihomo-linolenoyl-GPC (16:0/20:3n3 or 6)*	Lipid	Phosphatidylcholine (PC)	52454	LC/MS Pos Late	100008985	2199	784.585					0.7132	1.2087	1.0149	0.8439	0.8068	0.7906	0.8852	0.9082	1.2952	1.0029
1748	1-palmitoyl-2-arachidonoyl-GPC (16:0/20:4n6)	Lipid	Phosphatidylcholine (PC)	52462	LC/MS Pos Late	100008914	2091	782.569	35418-58-7	10747814		HMDB07982	0.704	1.027	1.0208	0.979	0.9264	0.7645	0.9634	0.993	1.0588	0.909
1754	1-palmitoyl-2-docosahexaenoyl-GPC (16:0/22:6)	Lipid	Phosphatidylcholine (PC)	52610	LC/MS Pos Late	100008915	2023	806.569	59403-54-2	6441886		HMDB07991	0.6339	1.0011	1.0184	1.033	0.9614	0.7638	0.95	0.9645	1.0944	0.9832
1760	1-palmitoleoyl-2-linolenoyl-GPC (16:1/18:3)*	Lipid	Phosphatidylcholine (PC)	53180	LC/MS Pos Late	100009345	1850	754.538				HMDB08008	0.7052	0.9913	0.8448	0.884	1.2779	1.1104	1.114	0.9127	1.3916	1.1699
1770	1-stearoyl-2-oleoyl-GPC (18:0/18:1)	Lipid	Phosphatidylcholine (PC)	52438	LC/MS Pos Late	100008904	2644	788.616	56421-10-4			HMDB08038	0.7387	1.5561	0.7607	1.0713	0.7514	0.6492	0.7792	0.7385	1.3176	0.8439
1773	1-stearoyl-2-linoleoyl-GPC (18:0/18:2)*	Lipid	Phosphatidylcholine (PC)	52452	LC/MS Pos Late	100008980	2380	786.601				HMDB08039	0.9674	1.2502	0.898	1.0619	1.0093	0.8317	0.9185	0.8188	1.1813	0.8896
1781	1-stearoyl-2-arachidonoyl-GPC (18:0/20:4)	Lipid	Phosphatidylcholine (PC)	42450	LC/MS Pos Late	100001869	2300	810.601	35418-59-8	16219824		HMDB08048	0.7392	1.0132	0.9676	0.9867	1.0105	0.817	0.9521	1.019	1.0341	0.9957
1787	1-stearoyl-2-docosahexaenoyl-GPC (18:0/22:6)	Lipid	Phosphatidylcholine (PC)	52611	LC/MS Pos Late	100008916	2197	834.601	59403-52-0			HMDB08057	0.4538	1.0304	0.903	0.9493	0.9069	0.6398	0.9328	0.9262	1.0255	0.9898
1791	1,2-dioleoyl-GPC (18:1/18:1)	Lipid	Phosphatidylcholine (PC)	52457	LC/MS Pos Late	100008905	2346	786.601	4235-95-4	10350317			1.2235	1.2664	0.7117	0.952	0.8406	0.9457	1.0962	0.9821	1.0925	1.0179
1794	1-oleoyl-2-linoleoyl-GPC (18:1/18:2)*	Lipid	Phosphatidylcholine (PC)	52453	LC/MS Pos Late	100008981	2165	784.585					1.7495	1.2056	0.8384	1.1418	0.2088	1.0118	0.9985	0.7513	1.0015	0.8917
1804	1-oleoyl-2-docosahexaenoyl-GPC (18:1/22:6)*	Lipid	Phosphatidylcholine (PC)	52697	LC/MS Pos Late	100009130	2011	832.585				HMDB08123	0.9244	0.9926	1.0006	0.9994	1.1972	0.9392	0.9162	1.0241	1.1172	1.0673
1805	1,2-dilinoleoyl-GPC (18:2/18:2)	Lipid	Phosphatidylcholine (PC)	52603	LC/MS Pos Late	100008903	2006	782.569	998-06-1	5288075		HMDB08138	1.1448	1.2526	0.9328	1.0785	1.0671	0.9973	0.9739	0.8074	1.1867	0.9539
1806	1-linoleoyl-2-linolenoyl-GPC (18:2/18:3)*	Lipid	Phosphatidylcholine (PC)	53176	LC/MS Pos Late	100009343	1939	780.554				HMDB08141	0.8954	1.1647	0.9064	0.9907	1.1895	1.1245	1.0093	0.7015	1.1654	0.9088
1809	1-linoleoyl-2-arachidonoyl-GPC (18:2/20:4n6)*	Lipid	Phosphatidylcholine (PC)	52710	LC/MS Pos Late	100009131	1969	806.569				HMDB08147	0.845	1.0078	0.9201	1.0435	1.1506	0.8559	0.9237	0.9922	1.1923	1.0301
1851	1-palmitoyl-2-oleoyl-GPE (16:0/18:1)	Lipid	Phosphatidylethanolamine (PE)	19263	LC/MS Pos Late	1526	2509	718.538	26662-94-2	5283496		HMDB05320	1.035	1.0045	0.9406	0.9955	0.7365	1.5793	1.376	0.8866	1.4337	0.9705
1852	1-palmitoyl-2-linoleoyl-GPE (16:0/18:2)	Lipid	Phosphatidylethanolamine (PE)	42449	LC/MS Pos Late	100001870	2275	716.522		9546747		HMDB05322	0.8017	0.9496	0.6159	1.0504	0.7264	1.4348	1.0786	0.5985	1.3352	0.6143
1855	1-palmitoyl-2-arachidonoyl-GPE (16:0/20:4)*	Lipid	Phosphatidylethanolamine (PE)	52464	LC/MS Pos Late	100008990	2198	740.522		9546800		HMDB05323	0.655	0.8298	0.9735	0.8645	0.8957	1.3246	1.2921	1.0265	1.2001	0.8793
1857	1-palmitoyl-2-docosahexaenoyl-GPE (16:0/22:6)*	Lipid	Phosphatidylethanolamine (PE)	52465	LC/MS Pos Late	100008991	2119	764.522		9546799		HMDB05324	0.4561	0.931	0.9485	0.9414	0.8253	1.4153	1.2819	1.1884	1.2846	1.0511
1864	1-stearoyl-2-oleoyl-GPE (18:0/18:1)	Lipid	Phosphatidylethanolamine (PE)	42448	LC/MS Pos Late	100001856	2858	746.569				HMDB08993	1.0518	0.6353	0.8808	0.5238	1.1054	2.123	1.6602	1.0475	0.9863	1.0843
1867	1-stearoyl-2-linoleoyl-GPE (18:0/18:2)*	Lipid	Phosphatidylethanolamine (PE)	52446	LC/MS Pos Late	100008976	2522	744.554		9546749		HMDB08994	1.0376	0.957	0.692	0.9972	0.9295	1.3848	1.0177	0.7065	1.1191	0.7207
1872	1-stearoyl-2-arachidonoyl-GPE (18:0/20:4)	Lipid	Phosphatidylethanolamine (PE)	52447	LC/MS Pos Late	100008977	2424	768.554		5289133		HMDB09003	0.719	0.613	0.9883	0.722	1.0505	1.3807	1.2507	1.1824	0.8946	0.9601
1876	1-stearoyl-2-docosahexaenoyl-GPE (18:0/22:6)*	Lipid	Phosphatidylethanolamine (PE)	52466	LC/MS Pos Late	100008992	2317	792.554		9546798		HMDB05334	0.3536	0.9086	0.5853	1.0186	0.7247	0.9933	1.0067	0.871	1.1378	0.7414
1878	1-oleoyl-2-linoleoyl-GPE (18:1/18:2)*	Lipid	Phosphatidylethanolamine (PE)	52687	LC/MS Pos Late	100009078	2270	742.538		9546753		HMDB05349	0.9443	0.7458	0.6109	1.0558	0.8363	1.5992	1.0217	0.6193	1.247	0.6892
1881	1-oleoyl-2-arachidonoyl-GPE (18:1/20:4)*	Lipid	Phosphatidylethanolamine (PE)	55041	LC/MS Pos Late	100009219	2200	766.538				HMDB09069	0.8052	0.5806	1.0647	0.6188	1.1237	1.587	1.2065	1.1797	0.8459	0.9863
1884	1-oleoyl-2-docosahexaenoyl-GPE (18:1/22:6)*	Lipid	Phosphatidylethanolamine (PE)	53209	LC/MS Pos Late	100009220	2119	790.538					0.5347	0.8464	0.8982	0.9088	0.9251	1.5751	1.0417	1.2051	1.1318	1.0995
1943	1-stearoyl-2-oleoyl-GPG (18:0/18:1)	Lipid	Phosphatidylglycerol (PG)	52623	LC/MS Polar	100001866	717	775.549	322647-48-3				0.885	0.8818	1.6589	0.86	1.8162	1.2571	0.9862	0.947	1.0138	1.5313
1950	1-palmitoyl-2-oleoyl-GPI (16:0/18:1)*	Lipid	Phosphatidylinositol (PI)	52669	LC/MS Polar	100009066	893	835.534				HMDB09783	1.1276	1.0288	0.9828	0.8805	1.3018	1.9467	1.3389	0.8063	0.8845	1.0204
1952	1-palmitoyl-2-linoleoyl-GPI (16:0/18:2)	Lipid	Phosphatidylinositol (PI)	52450	LC/MS Pos Late	1528	2730	852.56				HMDB09784	1.061	1.1105	1.0543	0.8614	1.1869	0.6896	0.8652	0.7718	1.1453	1.0702
1954	1-palmitoyl-2-arachidonoyl-GPI (16:0/20:4)*	Lipid	Phosphatidylinositol (PI)	52467	LC/MS Pos Late	100008993	2567	876.56				HMDB09789	0.6756	1.702	0.8898	1.2127	0.8411	0.6419	0.8436	0.8571	1.4413	1.0414
1958	1-stearoyl-2-linoleoyl-GPI (18:0/18:2)	Lipid	Phosphatidylinositol (PI)	52468	LC/MS Pos Late	100008994	3185	880.591				HMDB09809	1.2475	1.259	0.9667	0.9278	1.1832	0.9123	0.8875	0.6471	1.035	1.0476
1969	1-stearoyl-2-arachidonoyl-GPI (18:0/20:4)	Lipid	Phosphatidylinositol (PI)	52449	LC/MS Pos Late	100000616	3000	904.591	383907-33-3			HMDB09815	0.7447	1.2429	0.9588	0.9958	0.906	0.7577	0.8432	0.8712	1.1777	1.0258
1974	1-oleoyl-2-arachidonoyl-GPI (18:1/20:4) *	Lipid	Phosphatidylinositol (PI)	54994	LC/MS Pos Late	100010951	2568	902.575				HMDB09844	1.2887	1.5268	0.9614	0.9056	1.1406	0.8431	0.6743	0.9103	1.6054	1.1297
1996	1-linoleoyl-GPA (18:2)*	Lipid	Lysophospholipid	52690	LC/MS Neg	100009082	5483	433.236				HMDB07856	1.3034	1.1639	0.936	0.2737	0.695	0.4521	1.8096	1.0176	0.3648	1.5992
1998	1-arachidonoyl-GPA (20:4)	Lipid	Lysophospholipid	46325	LC/MS Neg	100004442	5499	457.236	799268-65-8				0.8297	0.9437	0.8529	0.2605	0.9062	0.6121	1.2439	1.0563	0.2605	1.2809
2005	1-palmitoyl-GPC (16:0)	Lipid	Lysophospholipid	33955	LC/MS Pos Late	100001263	1525	496.34	17364-16-8	86554		HMDB10382	0.8991	1.2483	0.9801	0.9065	1.0721	0.9282	1.0186	0.9449	1.0671	1.1244
2006	2-palmitoyl-GPC (16:0)*	Lipid	Lysophospholipid	35253	LC/MS Pos Late	100001562	1505	496.34		15061532		HMDB61702	0.7946	1.1204	0.9862	0.7802	0.8784	0.7638	0.8814	1.0372	1.0813	1.192
2007	1-palmitoleoyl-GPC (16:1)*	Lipid	Lysophospholipid	33230	LC/MS Pos Late	100001511	1450	494.324		24779461		HMDB10383	1.2876	1.4269	0.9593	0.9459	1.0125	0.9875	0.9615	0.8861	1.2547	1.1834
2008	2-palmitoleoyl-GPC (16:1)*	Lipid	Lysophospholipid	35819	LC/MS Pos Late	100001561	1425	494.324				HMDB10383	1.1335	1.5704	0.8408	1.0115	1.011	0.9164	1.0054	0.7481	2.1024	1.1959
2013	1-stearoyl-GPC (18:0)	Lipid	Lysophospholipid	33961	LC/MS Pos Late	100001271	1606	524.371	19420-57-6	497299		HMDB10384	0.7755	1.283	0.8942	0.8866	1.0516	0.8169	0.9013	0.9015	1.0869	1.0945
2015	1-oleoyl-GPC (18:1)	Lipid	Lysophospholipid	48258	LC/MS Pos Late	100001272	1540	522.355	19420-56-5	16081932		HMDB02815	1.2426	1.4006	1.0319	0.9494	1.1733	1.0025	0.9959	0.975	1.2107	1.22
2018	1-linoleoyl-GPC (18:2)	Lipid	Lysophospholipid	34419	LC/MS Pos Late	100001395	1465	520.34		11988421	C04100	HMDB10386	1.199	1.3475	0.9141	0.9357	1.151	0.9828	0.9032	0.8314	1.1786	1.0172
2020	1-linolenoyl-GPC (18:3)*	Lipid	Lysophospholipid	45951	LC/MS Pos Late	100005350	1410	518.324				HMDB10388	1.2574	1.7348	0.7809	0.842	1.1461	0.756	0.8783	0.5744	1.6973	1.0889
2035	1-arachidonoyl-GPC (20:4n6)*	Lipid	Lysophospholipid	33228	LC/MS Pos Late	100001551	1460	544.34			C05208	HMDB10395	1.0028	1.203	0.8788	0.8536	1.2627	0.8847	0.8864	1.0094	1.0963	1.0729
2046	1-lignoceroyl-GPC (24:0)	Lipid	Lysophospholipid	49617	LC/MS Pos Late	100002873	1907	608.465	325171-59-3			HMDB10405	0.6719	1.2431	0.9219	1.0489	0.9886	0.7892	0.8283	0.7837	1.2995	1.0614
2053	1-palmitoyl-GPE (16:0)	Lipid	Lysophospholipid	35631	LC/MS Pos Late	100001567	1544	454.293	53862-35-4	9547069		HMDB11503	0.8117	1.1804	0.9045	0.7867	1.0252	0.9911	1.0278	0.9345	1.0162	1.126
2060	1-stearoyl-GPE (18:0)	Lipid	Lysophospholipid	42398	LC/MS Pos Late	100001461	1626	482.324	69747-55-3	9547068		HMDB11130	0.9108	1.2829	0.9627	0.842	1.0386	0.979	0.9906	0.9364	1.0209	1.2166
2061	2-stearoyl-GPE (18:0)*	Lipid	Lysophospholipid	41220	LC/MS Neg	100003901	6350	480.31				HMDB11129	1.6131	1.2009	2.0178	0.4978	0.6581	0.5102	1.6952	0.6564	1.0158	0.8237
2062	1-oleoyl-GPE (18:1)	Lipid	Lysophospholipid	35628	LC/MS Pos Late	100001569	1554	480.308	89576-29-4	9547071		HMDB11506	1.3191	1.2627	0.7523	0.7486	1.2155	1.2965	1.0031	0.8036	0.9772	1.0746
2064	1-linoleoyl-GPE (18:2)*	Lipid	Lysophospholipid	36600	LC/MS Pos Late	100001570	1482	478.293		52925130		HMDB11507	1.5008	1.5034	0.6787	0.7489	1.6656	1.3351	0.9363	0.68	0.9992	0.9177
2075	1-arachidonoyl-GPE (20:4n6)*	Lipid	Lysophospholipid	35186	LC/MS Pos Late	100001571	1470	502.293		42607465		HMDB11517	0.756	1.3637	0.691	0.7774	1.4734	1.071	0.9542	0.7745	1.0313	0.9687
2091	1-palmitoyl-GPG (16:0)*	Lipid	Lysophospholipid	45970	LC/MS Neg	100005717	5570	483.273		3300276			1.6731	1.136	1.0295	0.7505	1.2764	0.8649	0.7455	0.6535	1.1798	0.8841
2095	1-oleoyl-GPG (18:1)*	Lipid	Lysophospholipid	45968	LC/MS Neg	100005716	5610	509.288					2.0103	1.0678	1.0982	0.9412	1.3225	0.9998	1.0282	0.5538	0.9527	0.8858
2097	1-linoleoyl-GPG (18:2)*	Lipid	Lysophospholipid	54885	LC/MS Neg	100009227	5516	507.273					1.2268	1.032	0.9223	1.1343	1.6216	0.8859	0.724	0.5881	1.1266	0.7751
2098	1-palmitoyl-GPI (16:0)	Lipid	Lysophospholipid	35305	LC/MS Neg	100001655	5564	571.289				HMDB61695	2.4659	1.78	0.7181	0.2392	0.9858	0.6064	1.5689	0.5321	0.2167	1.7699
2101	1-stearoyl-GPI (18:0)	Lipid	Lysophospholipid	19324	LC/MS Neg	100000656	5794	599.32	796963-93-4			HMDB61696	1.5275	1.2074	0.5041	0.4261	0.7996	0.5426	1.0477	0.5715	0.2593	1.5371
2103	1-oleoyl-GPI (18:1)*	Lipid	Lysophospholipid	36602	LC/MS Neg	100001777	5599	597.305					3.4529	1.3703	0.9775	0.2751	0.9159	0.4241	1.3483	0.2758	0.2499	1.4923
2105	1-linoleoyl-GPI (18:2)*	Lipid	Lysophospholipid	36594	LC/MS Neg	100001778	5494	595.289					2.1711	1.5704	1.0064	0.535	1.5594	0.7896	0.9684	0.5154	0.5289	1.1665
2109	1-arachidonoyl-GPI (20:4)*	Lipid	Lysophospholipid	34214	LC/MS Neg	100001654	5482	619.289				HMDB61690	1.4185	1.3723	0.96	0.5573	1.2406	0.6731	0.9566	0.8188	0.579	1.3295
2190	1-(1-enyl-palmitoyl)-2-oleoyl-GPE (P-16:0/18:1)*	Lipid	Plasmalogen	52477	LC/MS Pos Late	100009005	2600	702.543				HMDB11342	0.3699	1.1072	0.5342	0.816	0.4899	0.8996	0.9379	0.7621	1.2859	0.3699
2191	1-(1-enyl-palmitoyl)-2-linoleoyl-GPE (P-16:0/18:2)*	Lipid	Plasmalogen	52677	LC/MS Pos Late	100009069	2351	700.528				HMDB11343	0.7509	1.148	0.3805	0.9736	0.8557	0.7379	1.198	0.6466	1.1997	0.6146
2192	1-(1-enyl-palmitoyl)-2-palmitoyl-GPC (P-16:0/16:0)*	Lipid	Plasmalogen	52716	LC/MS Pos Late	100009162	2454	718.575		11146967		HMDB11206	0.9876	0.718	0.9642	0.9885	1.1145	1.1979	1.0619	0.9638	1.0594	1.0911
2194	1-(1-enyl-palmitoyl)-2-arachidonoyl-GPE (P-16:0/20:4)*	Lipid	Plasmalogen	52673	LC/MS Pos Late	100009002	2270	724.528				HMDB11352	0.7546	0.9968	0.7451	1.0085	0.9199	0.8147	0.931	0.8389	1.2057	0.7325
2196	1-(1-enyl-palmitoyl)-2-oleoyl-GPC (P-16:0/18:1)*	Lipid	Plasmalogen	52478	LC/MS Pos Late	100009007	2443	744.59					0.927	0.9132	0.9743	1.039	0.9989	0.9703	1.0011	0.9505	1.0926	1.0275
2198	1-(1-enyl-stearoyl)-2-oleoyl-GPE (P-18:0/18:1)	Lipid	Plasmalogen	52614	LC/MS Pos Late	100008919	2950	730.575	144371-68-6			HMDB11375	0.5848	1.0971	0.5409	0.8691	0.8503	0.8741	1.0278	0.7088	1.0314	0.3803
2199	1-(1-enyl-stearoyl)-2-linoleoyl-GPE (P-18:0/18:2)*	Lipid	Plasmalogen	52748	LC/MS Pos Late	100009225	2633	728.559				HMDB11376	1.0141	0.7631	0.8255	0.6501	1.1573	1.1216	1.2539	1.0208	1.1782	0.9593
2202	1-(1-enyl-palmitoyl)-2-arachidonoyl-GPC (P-16:0/20:4)*	Lipid	Plasmalogen	52689	LC/MS Pos Late	100009014	2154	766.575				HMDB11220	0.9317	0.8383	0.9318	0.8109	1.4716	0.927	1.352	1.1087	1.0051	0.9949
2203	1-(1-enyl-palmitoyl)-2-linoleoyl-GPC (P-16:0/18:2)*	Lipid	Plasmalogen	52682	LC/MS Pos Late	100009009	2226	742.575				HMDB11211	1.0014	1.0096	0.5755	0.795	1.28	0.8233	1.1559	0.7619	1.3758	0.8731
2206	1-(1-enyl-stearoyl)-2-arachidonoyl-GPE (P-18:0/20:4)*	Lipid	Plasmalogen	52475	LC/MS Pos Late	100008999	2511	752.559		9547058		HMDB05779	0.6983	1.032	0.8288	0.8611	1.018	0.893	1.0223	0.952	0.9879	0.8303
2220	1-(1-enyl-palmitoyl)-GPC (P-16:0)*	Lipid	Lysoplasmalogen	52474	LC/MS Pos Late	100002875	1547	480.345		10917802		HMDB10407	0.9771	1.1976	0.7128	0.9535	1.1564	0.9483	1.0831	0.9208	1.1039	1.128
2221	1-(1-enyl-palmitoyl)-GPE (P-16:0)*	Lipid	Lysoplasmalogen	39270	LC/MS Pos Late	100003000	1558	438.298					1.1177	1.1853	0.6745	0.6758	0.9916	1.2732	1.1507	1.0067	0.8566	1.259
2223	1-(1-enyl-oleoyl)-GPE (P-18:1)*	Lipid	Lysoplasmalogen	44621	LC/MS Pos Late	100005372	1566	464.314					1.2962	1.4236	0.6955	0.7946	0.9689	1.4306	1.2573	1.0839	0.8069	1.2794
2225	1-(1-enyl-stearoyl)-GPE (P-18:0)*	Lipid	Lysoplasmalogen	39271	LC/MS Pos Late	100003001	1649	466.329					0.944	1.1421	0.6615	0.5934	1.1767	1.2555	1.0841	0.8898	0.8754	1.1855
2228	glycerol	Lipid	Glycerolipid Metabolism	15122	LC/MS Neg	1254	758	91.0401	56-81-5	753	C00116	HMDB00131	1.0444	1.1332	2.4957	4.096	1.0069	0.9017	0.7567	0.5223	9.8076	0.6359
2229	glycerol 3-phosphate	Lipid	Glycerolipid Metabolism	43847	LC/MS Pos Early	100000258	580	173.021	29849-82-9	754	C00093	HMDB00126	0.7266	0.8702	1.9193	2.2206	0.7444	0.9834	0.9034	1.1316	4.826	1.2259
2234	glycerophosphoglycerol	Lipid	Glycerolipid Metabolism	48857	LC/MS Polar	100001619	2430	245.043		439964	C03274		0.9997	1.2111	1.7339	1.131	0.9993	0.7961	1.4414	0.5964	1.6437	0.8117
2235	1-myristoylglycerol (14:0)	Lipid	Monoacylglycerol	35625	LC/MS Neg	100001618	6353.3	227.202	75685-84-6	79050	C01885	HMDB11561	0.5203	0.8665	0.6659	1.1492	0.8306	0.9967	1.2141	0.7959	0.4905	1.0033
2238	1-palmitoylglycerol (16:0)	Lipid	Monoacylglycerol	21127	LC/MS Neg	100000827	6550	255.233	542-44-9	14900		HMDB31074	0.6352	0.4294	0.4429	0.89	0.9992	1.4201	0.8493	1.909	0.5328	1.682
2239	1-palmitoleoylglycerol (16:1)*	Lipid	Monoacylglycerol	52431	LC/MS Neg	100008952	6094	253.217				HMDB11565	0.4932	0.9776	0.8796	1.0899	0.9256	0.9195	0.9213	0.9034	1.1295	1.0716
2242	1-oleoylglycerol (18:1)	Lipid	Monoacylglycerol	21184	LC/MS Neg	100000924	6650	281.249	111-03-5	5283468		HMDB11567	0.335	0.6059	0.5269	0.6988	1.4749	1.343	0.5726	1.2624	0.7324	1.9888
2243	1-linoleoylglycerol (18:2)	Lipid	Monoacylglycerol	27447	LC/MS Neg	100001040	6477	279.233	2277-28-3	5283469			0.5555	0.6088	0.596	0.9316	1.1398	1.0489	0.8035	0.9511	0.8353	0.9375
2244	1-linolenoylglycerol (18:3)	Lipid	Monoacylglycerol	34393	LC/MS Neg	100001435	6214	277.217	124151-74-2	53480978		HMDB11569	0.4672	0.4672	0.4741	1.0137	0.8156	1.018	1	0.9024	0.8397	0.598
2247	1-dihomo-linolenylglycerol (20:3)	Lipid	Monoacylglycerol	48341	LC/MS Neg	100006121	6400	305.249					1.0417	0.4865	0.4571	0.6333	0.8112	1.0899	0.6696	1.0009	1.4212	1.3416
2248	1-arachidonylglycerol (20:4)	Lipid	Monoacylglycerol	34397	LC/MS Neg	100001433	6250	303.233	35474-99-8	5282281	C13857	HMDB11549	1.3927	0.8931	0.5916	0.6297	0.8832	1.0454	0.7845	1.0013	1.1259	1.1246
2251	1-docosahexaenoylglycerol (22:6)	Lipid	Monoacylglycerol	35153	LC/MS Neg	100001481	6150	309.222				HMDB11587	1.3319	0.6091	0.5448	0.4778	0.8464	0.9895	0.9169	1.3973	1.1822	1.4774
2254	2-palmitoleoylglycerol (16:1)*	Lipid	Monoacylglycerol	52432	LC/MS Neg	100008953	6016	253.217				HMDB11565	0.6003	0.7994	1.0122	1.7074	0.9878	0.9013	0.744	0.7445	2.777	0.9088
2256	2-oleoylglycerol (18:1)	Lipid	Monoacylglycerol	21232	LC/MS Neg	100000943	6500	281.249	3443-84-3	5319879		HMDB11537	0.3047	0.41	0.7569	1.2783	1.044	1.0139	0.5003	0.9861	2.1428	1.528
2257	2-linoleoylglycerol (18:2)	Lipid	Monoacylglycerol	32506	LC/MS Neg	100000987	6250	279.233	3443-82-1	5365676		HMDB11538	0.6997	0.5574	0.8748	1.3601	1.0493	0.9507	0.7707	0.8517	1.7577	0.9019
2266	diacylglycerol (16:1/18:2 [2], 16:0/18:3 [1])*	Lipid	Diacylglycerol	54966	LC/MS Pos Late	100010940	2733	608.525					0.5345	0.9438	1.4286	1.8036	0.8311	1.0512	0.5345	0.6213	2.0669	0.5345
2282	palmitoyl-oleoyl-glycerol (16:0/18:1) [2]*	Lipid	Diacylglycerol	54942	LC/MS Pos Late	100010917	3695	612.556			C13861	HMDB07102	0.3475	0.3475	0.4839	1.5909	0.3475	0.3475	0.3475	0.3475	1.6179	0.3475
2283	palmitoyl-linoleoyl-glycerol (16:0/18:2) [1]*	Lipid	Diacylglycerol	52633	LC/MS Pos Late	100009052	3080	610.541		9543695		HMDB07103	0.4146	0.4146	0.4146	0.7501	0.5789	1.2368	1	0.661	0.4146	0.6796
2284	palmitoyl-linoleoyl-glycerol (16:0/18:2) [2]*	Lipid	Diacylglycerol	52634	LC/MS Pos Late	100009055	3197	610.541				HMDB07103	0.2414	0.5811	0.2414	0.7946	0.5858	1.1941	1.2058	0.2414	1.2421	0.6025
2299	oleoyl-oleoyl-glycerol (18:1/18:1) [1]*	Lipid	Diacylglycerol	54945	LC/MS Pos Late	100010918	3571	638.572				HMDB07218	0.2256	0.7035	1.2139	0.9378	0.2256	0.8174	0.7812	0.5905	1.3872	1
2300	oleoyl-oleoyl-glycerol (18:1/18:1) [2]*	Lipid	Diacylglycerol	54946	LC/MS Pos Late	100010919	3695	638.572				HMDB07218	0.4162	0.7386	1.3415	1.5473	0.7703	0.7709	0.7196	0.5975	2.2042	0.8645
2302	oleoyl-linoleoyl-glycerol (18:1/18:2) [1]	Lipid	Diacylglycerol	46798	LC/MS Pos Late	100002989	3115	636.556	106292-55-1			HMDB07219	0.3397	0.6617	1.0089	1.2406	0.9911	1.0704	0.9351	0.6133	0.8138	0.7754
2303	oleoyl-linoleoyl-glycerol (18:1/18:2) [2]	Lipid	Diacylglycerol	46799	LC/MS Pos Late	100002990	3223	636.556	104346-53-4			HMDB07219	0.3546	0.7402	1.2145	1.6475	0.9045	1.0024	0.9466	0.5659	1.8973	0.7367
2307	linoleoyl-linoleoyl-glycerol (18:2/18:2) [1]*	Lipid	Diacylglycerol	54968	LC/MS Pos Late	100010941	2689	634.541				HMDB07248	0.3304	0.4027	0.875	1.2232	0.9703	1.4159	1.333	0.6822	0.5557	0.7804
2313	stearoyl-arachidonoyl-glycerol (18:0/20:4) [1]*	Lipid	Diacylglycerol	57450	LC/MS Pos Late	100010949	3404	662.572					0.9387	0.817	0.7164	0.7164	0.8566	0.7164	0.7164	0.7164	2.3257	0.9681
2314	stearoyl-arachidonoyl-glycerol (18:0/20:4) [2]*	Lipid	Diacylglycerol	57449	LC/MS Pos Late	100010950	3522	662.572					1.0269	1.4055	0.5762	0.5782	0.5762	0.5762	1.1985	1.0465	1.2817	0.8911
2316	oleoyl-arachidonoyl-glycerol (18:1/20:4) [2]*	Lipid	Diacylglycerol	54961	LC/MS Pos Late	100010937	2990	660.556				HMDB07228	0.4665	0.4665	1.5949	1.1571	1	0.8119	1.1959	0.8932	1.5471	0.9482
2317	linoleoyl-arachidonoyl-glycerol (18:2/20:4) [1]*	Lipid	Diacylglycerol	54955	LC/MS Pos Late	100010922	2566	658.541				HMDB07257	0.2314	0.8802	0.9127	1.6464	1.1055	0.9613	1.0387	0.5059	1.4341	0.5823
2318	linoleoyl-arachidonoyl-glycerol (18:2/20:4) [2]*	Lipid	Diacylglycerol	54956	LC/MS Pos Late	100010923	2624	658.541				HMDB07257	0.5494	0.2989	2.7118	0.7785	2.8697	1.8838	3.405	2.369	1	1.9765
2343	sphinganine	Lipid	Sphingolipid Metabolism	17769	LC/MS Pos Late	313	1413	302.305	3102-56-5	3126	C00836	HMDB00269	1.0397	0.4321	2.3244	0.9341	0.4321	0.6444	1.2284	1.4951	1	1.1337
2344	sphinganine-1-phosphate	Lipid	Sphingolipid Metabolism	52605	LC/MS Pos Late	100001876	1431	382.272	19794-97-9	520		HMDB01383	0.7978	0.9794	1.4769	1.1568	0.4445	0.6603	1.139	1.193	1.4578	1.2346
2347	N-palmitoyl-sphinganine (d18:0/16:0)	Lipid	Sphingolipid Metabolism	52604	LC/MS Pos Late	100009028	3090	540.535	5966-29-0	5283572		HMDB11760	1.2625	0.8441	0.9459	0.9706	1.3013	1.2635	1.4366	0.766	0.6136	0.6504
2358	palmitoyl dihydrosphingomyelin (d18:0/16:0)*	Lipid	Sphingolipid Metabolism	52434	LC/MS Pos Late	100008954	2290	705.591		9939965			1.0657	1.0388	0.9063	0.969	1.0351	0.9313	1.0062	0.8177	1.1216	0.9361
2359	behenoyl dihydrosphingomyelin (d18:0/22:0)*	Lipid	Sphingolipid Metabolism	57331	LC/MS Pos Late	100009026	3150	789.684				HMDB12091	0.3728	0.7139	0.8429	0.7785	1.071	0.8244	1.34	0.8182	1.3409	1.2014
2360	palmitoyl sphingomyelin (d18:1/16:0)	Lipid	Sphingolipid Metabolism	37506	LC/MS Pos Late	100002107	2168	703.575	6254-89-3	9939941			1.0962	0.9284	1.0264	0.8879	1.1266	0.9217	1.077	0.9643	0.9703	1.1695
2361	stearoyl sphingomyelin (d18:1/18:0)	Lipid	Sphingolipid Metabolism	19503	LC/MS Pos Late	1538	2400	731.606	85187-10-6;85187-10-6	6453725	C00550	HMDB01348	1.1117	0.8206	1.0492	1.093	1.0212	0.8673	0.9923	1.0491	0.6683	1.0077
2362	behenoyl sphingomyelin (d18:1/22:0)*	Lipid	Sphingolipid Metabolism	48492	LC/MS Pos Late	100006294	3083	787.669				HMDB12103	0.3255	0.6463	0.9307	0.6906	1.0233	0.7578	1.4123	1.0046	1.0667	1.0653
2363	tricosanoyl sphingomyelin (d18:1/23:0)*	Lipid	Sphingolipid Metabolism	52436	LC/MS Pos Late	100008955	3200	801.684				HMDB12105	0.6695	1.0363	1.0396	0.9637	1.2971	0.7925	0.9457	0.8667	1.1603	1.3493
2364	lignoceroyl sphingomyelin (d18:1/24:0)	Lipid	Sphingolipid Metabolism	57330	LC/MS Pos Late	100006298	3437	815.7	60037-60-7				0.434	1.15	0.7781	0.9749	1.0204	0.7189	0.9796	0.7456	1.3209	0.8737
2366	sphingomyelin (d18:1/14:0, d16:1/16:0)*	Lipid	Sphingolipid Metabolism	42463	LC/MS Pos Late	100004328	1998	675.544		11433862		HMDB12097	1.0598	1.2232	0.8507	1.0256	1.0028	0.6415	0.737	0.8521	1.1106	1.117
2367	sphingomyelin (d18:2/14:0, d18:1/14:1)*	Lipid	Sphingolipid Metabolism	47154	LC/MS Pos Late	100005985	1860	673.528					0.7226	1.3408	0.7411	0.9042	0.9593	0.5326	0.8661	0.6843	1.342	1.1271
2368	sphingomyelin (d17:1/16:0, d18:1/15:0, d16:1/17:0)*	Lipid	Sphingolipid Metabolism	52433	LC/MS Pos Late	100006314	2082	689.559	121999-58-4				1.3456	1.221	0.9337	1.2736	1.0105	0.7283	0.6296	0.8779	1.2542	1.0271
2369	sphingomyelin (d18:2/16:0, d18:1/16:1)*	Lipid	Sphingolipid Metabolism	42459	LC/MS Pos Late	100004329	2002	701.559					0.7578	0.985	0.8487	1.0004	0.9996	0.7647	1.0242	0.8679	1.0349	1.024
2370	sphingomyelin (d18:1/17:0, d17:1/18:0, d19:1/16:0)	Lipid	Sphingolipid Metabolism	52615	LC/MS Pos Late	100008920	2312	717.591	121999-64-2				1.0864	0.8778	0.9296	1.0906	1.064	0.8756	0.9368	0.9469	1.1622	1.0143
2371	sphingomyelin (d18:1/18:1, d18:2/18:0)	Lipid	Sphingolipid Metabolism	37529	LC/MS Pos Late	100002106	2167	729.591	108392-10-5	6443882		HMDB12101	1.0381	0.7877	0.9781	0.9034	1.0219	0.7809	1.1541	0.9644	0.7746	1.18
2372	sphingomyelin (d18:1/20:0, d16:1/22:0)*	Lipid	Sphingolipid Metabolism	48490	LC/MS Pos Late	100006290	2685	759.638				HMDB12102	0.3909	0.7988	0.8951	1.0382	0.7698	0.5891	0.9918	0.8995	1.1834	1.0082
2373	sphingomyelin (d18:1/20:1, d18:2/20:0)*	Lipid	Sphingolipid Metabolism	48491	LC/MS Pos Late	100006292	2383	757.622	222403-67-0				0.7391	0.6192	1.1249	1.0475	1.0606	0.8461	1.2226	1.0906	0.8877	1.2832
2374	sphingomyelin (d18:1/21:0, d17:1/22:0, d16:1/23:0)*	Lipid	Sphingolipid Metabolism	52495	LC/MS Pos Late	100009025	2793	773.653					0.4162	0.9143	0.7788	0.9567	1.1215	0.5411	1.0433	0.9298	1.4168	1.1585
2375	sphingomyelin (d18:1/22:1, d18:2/22:0, d16:1/24:1)*	Lipid	Sphingolipid Metabolism	48493	LC/MS Pos Late	100006295	2666	785.653				HMDB12104	0.5394	0.8334	0.9343	0.966	1.034	0.7862	1.0732	0.9436	1.2861	1.0435
2376	sphingomyelin (d18:2/23:0, d18:1/23:1, d17:1/24:1)*	Lipid	Sphingolipid Metabolism	52435	LC/MS Pos Late	100008956	2845	799.669					0.9694	1.1677	1.0414	0.9807	1.4906	0.7824	1.0108	0.9892	1.1694	1.3721
2377	sphingomyelin (d18:1/24:1, d18:2/24:0)*	Lipid	Sphingolipid Metabolism	47153	LC/MS Pos Late	100005986	3033	813.684	94359-13-4			HMDB12107	0.7926	1.1956	1.0147	0.9853	1.1706	0.8998	0.9815	0.8976	1.1317	1.0915
2378	sphingomyelin (d18:2/24:1, d18:1/24:2)*	Lipid	Sphingolipid Metabolism	52437	LC/MS Pos Late	100008957	2635	811.669					1.1934	1.0035	1.0824	0.9949	1.3434	0.9608	1.1034	0.923	0.9003	1.1476
2381	sphingosine	Lipid	Sphingolipid Metabolism	17747	LC/MS Pos Late	297	1393	300.29	123-78-4	5353955	C00319	HMDB00252	0.967	0.8537	1.5217	1.4823	0.7041	0.6798	0.9593	1.1004	1.2907	1.0573
2382	sphingosine 1-phosphate	Lipid	Sphingolipid Metabolism	34445	LC/MS Polar	100000626	1850	378.241	26993-30-6	5283560	C06124	HMDB00277	1.0138	0.9875	1.3012	1.2887	0.9909	1.0091	0.8927	0.8469	1.1035	1.0317
2385	sphingomyelin (d18:2/23:1)*	Lipid	Sphingolipid Metabolism	57482	LC/MS Pos Late	100015791	2315	797.653					0.9972	1.3094	0.892	1.2968	1.2651	0.8997	0.8692	0.8997	1.3604	1.0521
2386	sphingomyelin (d18:2/21:0, d16:2/23:0)*	Lipid	Sphingolipid Metabolism	57480	LC/MS Pos Late	100015790	2330	771.637					0.7528	0.9973	0.9443	1.1093	1.1226	0.686	0.7657	0.9688	1.5274	1.1303
2388	sphingomyelin (d18:2/24:2)*	Lipid	Sphingolipid Metabolism	57479	LC/MS Pos Late	100015789	2215	809.653					1.5912	1.0361	0.7914	0.8569	1.1969	1.1722	1.1574	0.7625	0.7522	1.1624
2391	sphingomyelin (d18:1/25:0, d19:0/24:1, d20:1/23:0, d19:1/24:0)*	Lipid	Sphingolipid Metabolism	57478	LC/MS Pos Late	100015792	3500	829.716					0.3238	0.6565	0.7841	0.6938	1.3684	1.1564	1.5638	1.022	1.1418	0.801
2392	sphingomyelin (d18:1/22:2, d18:2/22:1, d16:1/24:2)*	Lipid	Sphingolipid Metabolism	57477	LC/MS Pos Late	100006296	2209	783.637					0.9221	0.827	0.9816	0.9989	1.293	1.011	1.0713	0.9761	1.1925	1.1056
2393	sphingomyelin (d18:0/20:0, d16:0/22:0)*	Lipid	Sphingolipid Metabolism	57476	LC/MS Pos Late	100015786	2600	761.653					0.3092	1.2341	0.3806	1	0.4504	0.4625	0.7428	0.5417	2.083	0.9397
2394	sphingomyelin (d18:0/18:0, d19:0/17:0)*	Lipid	Sphingolipid Metabolism	57473	LC/MS Pos Late	100009027	2362	733.622				HMDB12087	0.9365	1.1698	0.9518	0.9031	0.9372	0.8845	1.0509	0.7957	1.2856	1.077
2395	sphingomyelin (d17:2/16:0, d18:2/15:0)*	Lipid	Sphingolipid Metabolism	57483	LC/MS Pos Late	100015793	1837	687.544					0.8038	1.1194	0.9966	0.9907	1.136	0.5713	0.7882	0.9963	1.2153	1.3468
2396	sphingomyelin (d18:2/18:1)*	Lipid	Sphingolipid Metabolism	57474	LC/MS Pos Late	100015788	1904	727.575					1.0097	0.9139	0.9903	0.9676	0.9786	0.8227	1.2057	1.084	0.7615	1.2668
2397	sphingomyelin (d18:1/19:0, d19:1/18:0)*	Lipid	Sphingolipid Metabolism	57475	LC/MS Pos Late	100015787	2330	745.622					0.5947	0.9668	1.0103	1.2191	0.8339	0.5397	0.8368	0.9651	1.172	1.1998
2402	sphingadienine	Lipid	Sphingolipid Metabolism	57426	LC/MS Pos Late	100015643	1350	298.274	25696-03-1	6449795			1	0.9398	1.3006	1.0148	0.8017	0.6429	0.6664	1.1695	0.9541	1.1604
2443	sphingomyelin (d17:1/14:0, d16:1/15:0)*	Lipid	Sphingolipid Metabolism	62152	LC/MS Pos Late	100020276	1950	661.528					1.0147	1.3769	0.9049	1.0023	1.1185	0.5274	0.5673	0.8545	1.1532	1.2774
2445	N-palmitoyl-sphingosine (d18:1/16:0)	Lipid	Ceramides	44877	LC/MS Pos Late	1518	2893	538.519	24696-26-2	5283564		HMDB04949	0.7082	1.7969	0.7341	1.2154	0.8028	0.542	0.7561	0.663	1.0947	0.643
2447	N-stearoyl-sphingosine (d18:1/18:0)*	Lipid	Ceramides	54979	LC/MS Pos Late	1547	3392	566.551	104404-17-3	5283565		HMDB04950	0.6525	1.8012	1.279	1.0371	0.789	0.5108	0.5358	0.817	0.9629	0.9527
2450	ceramide (d16:1/24:1, d18:1/22:1)*	Lipid	Ceramides	57437	LC/MS Pos Late	100015727	3850	620.598					0.7487	1.5461	1.4594	1.0412	0.9526	0.5731	0.8656	1.1018	1.4113	1.0996
2453	ceramide (d18:1/20:0, d16:1/22:0, d20:1/18:0)*	Lipid	Ceramides	57440	LC/MS Pos Late	100015755	3920	594.582					0.4168	1.0866	1.2422	0.9453	0.5705	0.4716	0.8603	0.9407	0.9911	1.0089
2454	ceramide (d18:2/24:1, d18:1/24:2)*	Lipid	Ceramides	57443	LC/MS Pos Late	100015744	3858	646.613					1.03	1.8995	1.0996	1.148	1.0632	0.561	0.7579	0.723	1.1711	0.8227
2455	glycosyl-N-palmitoyl-sphingosine (d18:1/16:0)	Lipid	Ceramides	53013	LC/MS Pos Late	100009272	2623	700.572					0.68	2.5611	0.6895	1.4881	0.5674	0.3648	0.5451	0.597	1.4877	0.6279
2456	glycosyl-N-stearoyl-sphingosine (d18:1/18:0)	Lipid	Ceramides	52234	LC/MS Pos Late	100001882	3053	728.604					0.6889	1.7022	1.0017	1.108	0.709	0.3573	0.6053	0.7383	0.9173	1.2877
2459	glycosyl-N-behenoyl-sphingadienine (d18:2/22:0)*	Lipid	Ceramides	57421	LC/MS Pos Late	100015625	3420	782.65					0.5806	1.7128	0.9405	0.8713	1.217	0.4731	1.0595	0.877	2.0687	1.2706
2464	glycosyl-N-erucoyl-sphingosine (d18:1/22:1)*	Lipid	Ceramides	57455	LC/MS Pos Late	100015728	3373	782.65					0.8108	1.9504	1.0968	1.1186	0.9739	0.5205	0.7888	1.0261	1.6148	1.1693
2470	glycosyl ceramide (d18:1/20:0, d16:1/22:0)*	Lipid	Ceramides	57595	LC/MS Pos Late	100015882	3414	756.635					0.4328	1.3487	0.9489	0.8832	0.665	0.3637	0.8145	0.8363	1.1298	1.2172
2471	glycosyl ceramide (d18:1/23:1, d17:1/24:1)*	Lipid	Ceramides	57448	LC/MS Pos Late	100015751	3667	796.666					1.3854	2.1591	0.8786	1.233	1.2735	0.6332	0.8569	0.9863	1.6636	1.0747
2472	glycosyl ceramide (d18:2/24:1, d18:1/24:2)*	Lipid	Ceramides	57453	LC/MS Pos Late	100015745	3380	808.666					1.1448	2.3256	0.9863	1.1661	1.2062	0.5698	0.8961	0.8227	1.436	1.1036
2480	3-hydroxy-3-methylglutarate	Lipid	Mevalonate Metabolism	531	LC/MS Polar	112	2850	161.046	503-49-1	1662	C03761	HMDB00355	0.98	1.3341	1.4885	1.382	0.5847	0.6103	1.1925	0.8403	1.2869	0.9142
2481	mevalonate	Lipid	Mevalonate Metabolism	39583	LC/MS Polar	30	1462	147.066	96949-03-0	439230	C02104	HMDB00227	1.2224	1.3257	0.8515	0.8606	0.8627	0.8298	1.0087	0.8332	0.872	1.0855
2495	cholesterol	Lipid	Sterol	63	LC/MS Pos Late	266	2707	369.352	57-88-5	11025495	C00187	HMDB00067	0.894	1.0594	1.0394	0.9479	1.0973	0.7871	0.9604	0.9759	1.0035	1.0801
2505	7-alpha-hydroxy-3-oxo-4-cholestenoate (7-Hoca)	Lipid	Sterol	36776	LC/MS Neg	100001609	5288.1	429.301	115538-85-7	3081085	C17337	HMDB12458	2.5592	1.0457	1.0275	1.6381	1.0008	0.7522	0.4974	0.5452	1.9262	0.8646
2518	4-cholesten-3-one	Lipid	Sterol	38125	LC/MS Pos Late	100002227	2520	385.346	601-57-0	91477	C00599	HMDB00921	0.55	1.2211	0.9194	1.8021	0.6466	0.6066	0.5007	0.4378	1.3405	0.7403
2519	beta-sitosterol	Lipid	Sterol	27414	LC/MS Pos Late	100001033	3054	397.383	83-46-5	222284	C01753	HMDB00852	0.1248	1.1311	0.6396	0.6088	1.296	0.6435	0.7813	1.0004	1.0194	0.9929
2521	campesterol	Lipid	Sterol	33997	LC/MS Pos Late	100001269	2873	383.367	474-62-4	173183	C01789	HMDB02869	0.2142	1.019	0.8408	0.7073	1.3592	0.5027	0.6985	0.981	1.1128	0.9198
2589	corticosterone	Lipid	Corticosteroids	5983	LC/MS Neg	272	5040	345.207	50-22-6	5753	C02140	HMDB01547	1.8338	1.4271	0.9426	0.6707	1.0308	0.8009	0.3703	0.5016	0.5436	1.1643
2684	cholate	Lipid	Primary Bile Acid Metabolism	22842	LC/MS Neg	136	5165	407.28	81-25-4	221493	C00695	HMDB00619	60.7797	1.2845	7.9693	3.2386	0.6606	0.93	0.4871	0.8133	1.2431	0.9978
2685	glycocholate	Lipid	Primary Bile Acid Metabolism	18476	LC/MS Neg	342	5163	464.302	475-31-0;863-57-0	10140	C01921	HMDB00138	18.3035	0.7325	0.7325	0.7325	0.7325	1.0166	0.7325	0.7325	0.7325	0.9834
2686	taurocholate	Lipid	Primary Bile Acid Metabolism	18497	LC/MS Neg	1648	5150	514.284	145-42-6	6675	C05122	HMDB00036	61.5805	0.9442	0.7682	1.1007	0.4278	0.9066	0.5639	1.5584	4.8005	0.8907
2687	chenodeoxycholate	Lipid	Primary Bile Acid Metabolism	1563	LC/MS Neg	1123	5264	391.285	474-24-9;474-25-9	10133	C02528	HMDB00518	24.1011	0.7146	1.0624	1.194	0.604	1.7151	0.6474	0.7105	0.7136	1.065
2689	taurochenodeoxycholate	Lipid	Primary Bile Acid Metabolism	18494	LC/MS Neg	1629	5250	498.289	6009-98-9	387316	C05465	HMDB00951	102.532	0.6846	0.7084	1.3476	0.3496	1.3834	0.5335	1.4343	2.8903	0.5419
2690	beta-muricholate	Lipid	Primary Bile Acid Metabolism	31885	LC/MS Neg	100001066	4794	407.28	2393-59-1	5283853	C17726	HMDB00415	21.5753	1.2178	1.8108	0.7177	0.6735	1.523	0.3575	0.4133	1.2661	1.8849
2691	alpha-muricholate	Lipid	Primary Bile Acid Metabolism	34092	LC/MS Neg	100001280	4765	407.28	2393-58-0	3083761	C17647	HMDB00506	55.2926	1.1282	10.2491	3.1884	0.5155	1.1301	0.3436	0.5243	0.9762	0.8363
2692	tauro-alpha-muricholate	Lipid	Primary Bile Acid Metabolism	42605	LC/MS Neg	100004064	4745	514.284					75.2651	0.9602	0.6866	1.4028	0.2331	1.3411	0.3742	1.0985	3.8872	0.5626
2693	tauro-beta-muricholate	Lipid	Primary Bile Acid Metabolism	33983	LC/MS Neg	100001250	4774	514.284	25696-60-0	168408		HMDB00932	99.1332	0.951	1.2011	1.0172	0.7147	1.1934	0.6844	0.9382	5.3477	1.4136
2696	glyco-beta-muricholate**	Lipid	Primary Bile Acid Metabolism	62066	LC/MS Neg	100020214	4762	464.302					1	1	1	1	1	1	1	1	1	1
2703	deoxycholate	Lipid	Secondary Bile Acid Metabolism	1114	LC/MS Neg	302	5294	391.285	83-44-3	222528	C04483	HMDB00626	11.948	1.3251	1.1492	0.9463	0.965	1.6081	0.4795	0.7335	0.7026	1.3235
2706	taurodeoxycholate	Lipid	Secondary Bile Acid Metabolism	12261	LC/MS Neg	1668	5257.4	498.289	207737-97-1	2733768	C05463	HMDB00896	18.4032	1.029	0.7957	1.6293	0.6363	1.3294	0.7175	1.1886	5.4469	0.7473
2708	lithocholate	Lipid	Secondary Bile Acid Metabolism	1483	LC/MS Neg	405	5372	375.29	434-13-9	9903	C03990	HMDB00761	1	1	1	1	1	1	1	1	1	1
2715	ursodeoxycholate	Lipid	Secondary Bile Acid Metabolism	1605	LC/MS Neg	1135	5055	391.285	128-13-2	31401	C07880	HMDB00946	12.553	1.1549	1.351	0.9318	0.4099	1.6835	0.4244	0.4229	0.9386	1.374
2716	isoursodeoxycholate	Lipid	Secondary Bile Acid Metabolism	57577	LC/MS Neg	100002488	4809	391.285	78919-26-3	127601	C17662	HMDB00686	15.9024	1.8207	1.7286	1.037	0.4712	1.6865	0.39	0.4801	1.3228	1.4912
2718	tauroursodeoxycholate	Lipid	Secondary Bile Acid Metabolism	39378	LC/MS Neg	100002912	5025	498.289	14605-22-2	9848818		HMDB00874	49.4395	1.055	1.0714	1.3469	0.3936	0.9293	0.5532	0.6687	6.2078	0.6566
2722	6-oxolithocholate	Lipid	Secondary Bile Acid Metabolism	46336	LC/MS Neg	100001068	5033	389.27	2393-61-5	164960			18.961	1.4314	1.4617	0.9563	0.3763	2.799	0.3763	0.4877	0.3763	1.2022
2723	7-ketolithocholate	Lipid	Secondary Bile Acid Metabolism	43830	LC/MS Neg	100001069	5082	389.27	4651-67-6	444262		HMDB00467	1	1	1	1	1	1	1	1	1	1
2724	hyocholate	Lipid	Secondary Bile Acid Metabolism	34093	LC/MS Neg	100001279	5046	407.28	547-75-1	92805	C17649	HMDB00760	9.9096	0.3413	1.0377	0.3413	1.0927	1.6236	0.9506	0.4457	0.9453	1.3904
2727	hyodeoxycholate	Lipid	Secondary Bile Acid Metabolism	27531	LC/MS Neg	100000777	5097	391.285	83-49-8	5283820	C15517	HMDB00733	14.1184	1.4326	0.8807	0.8332	1	2.4399	0.5572	0.4988	0.4988	2.7609
2728	taurohyodeoxycholic acid	Lipid	Secondary Bile Acid Metabolism	43588	LC/MS Neg	100003869	5073	498.289	38411-85-7	119046			22.4361	1.2529	1.0852	1.2106	0.7916	0.9647	0.8546	1.5612	1.0353	1.4031
2731	3-dehydrocholate	Lipid	Secondary Bile Acid Metabolism	43835	LC/MS Neg	100001062	5050	405.265	2304-89-4	159655		HMDB00502	25.0451	0.9174	2.933	0.9327	0.5021	2.1642	1.0156	0.8532	0.293	1.1887
2732	12-dehydrocholate	Lipid	Secondary Bile Acid Metabolism	44644	LC/MS Neg	100001072	4871	405.265	2458-08-4;2458-08-4	94235		HMDB00400	22.642	0.9566	0.3933	1.4027	0.4295	4.952	0.8684	0.8241	1.5796	2.2981
2736	7-ketodeoxycholate	Lipid	Secondary Bile Acid Metabolism	31904	LC/MS Neg	100001063	4821	405.265	911-40-0	188292		HMDB00391	28.4227	2.1484	3.7835	1.1916	0.4075	1.3092	0.6088	0.7399	1.4682	1.228
2744	ursocholate	Lipid	Secondary Bile Acid Metabolism	57573	LC/MS Neg	100002913	4648	407.28	2955-27-3				33.9718	0.8266	3.8804	1.0322	0.4532	2.1091	0.9628	0.9678	1.8463	1.1305
3310	inosine	Nucleotide	Purine Metabolism, (Hypo)Xanthine/Inosine containing	1123	LC/MS Neg	361	1602.1	267.073	58-63-9	6021	C00294	HMDB00195	0.5748	0.3506	55.9823	54.1836	0.8591	0.6672	0.3506	1	157.011	0.3506
3311	hypoxanthine	Nucleotide	Purine Metabolism, (Hypo)Xanthine/Inosine containing	3127	LC/MS Neg	171	1291.2	135.031	68-94-0	790	C00262	HMDB00157	0.5988	0.5988	0.6723	0.5988	0.5988	0.5988	0.5988	0.5988	1.3277	0.5988
3312	xanthine	Nucleotide	Purine Metabolism, (Hypo)Xanthine/Inosine containing	3147	LC/MS Neg	1004	910	151.026	69-89-6	1188	C00385	HMDB00292	0.0003	0.0003	1	0.7911	0.0003	0.0003	0.0003	0.0003	1.1346	0.0003
3314	xanthosine	Nucleotide	Purine Metabolism, (Hypo)Xanthine/Inosine containing	15136	LC/MS Neg	100000299	1075	283.068	146-80-5	64959	C01762	HMDB00299	1.0753	3.2213	55.6462	92.7887	1.4175	0.8072	0.6503	0.1876	347.429	0.8423
3317	N1-methylinosine	Nucleotide	Purine Metabolism, (Hypo)Xanthine/Inosine containing	48351	LC/MS Pos Early	100001409	1430	283.104	20245-33-4	65095		HMDB02721	0.8014	1.3315	0.9644	0.7723	0.5254	0.9599	1.3028	1.2746	0.6495	1.1672
3320	urate	Nucleotide	Purine Metabolism, (Hypo)Xanthine/Inosine containing	1604	LC/MS Neg	1134	757.1	167.021	69-93-2;120K5305	1175	C00366	HMDB00289	1.5435	1.255	6.8723	6.5373	1.0204	0.5508	0.7349	0.6178	9.5946	0.4989
3321	allantoin	Nucleotide	Purine Metabolism, (Hypo)Xanthine/Inosine containing	1107	LC/MS Polar	1002	1672	157.037	97-59-6	204	C02350	HMDB00462	0.6037	1.0649	0.9144	0.9049	0.7815	0.974	1.026	0.9684	1.2918	0.9275
3322	allantoic acid	Nucleotide	Purine Metabolism, (Hypo)Xanthine/Inosine containing	33434	LC/MS Polar	218	2960	175.047	99-16-1	203	C00499	HMDB01209	0.4085	0.8927	0.4085	0.5717	0.6147	1.1606	0.957	1.1795	0.6493	0.9247
3327	adenosine 5'-monophosphate (AMP)	Nucleotide	Purine Metabolism, Adenine containing	32342	LC/MS Pos Early	209	1013	348.07	149022-20-8	6083	C00020	HMDB00045	0.9539	0.5271	1.1044	1.9001	1.7642	0.7988	1.2319	1.1807	1.1612	1.4791
3330	adenosine 3',5'-cyclic monophosphate (cAMP)	Nucleotide	Purine Metabolism, Adenine containing	2831	LC/MS Neg	207	1952.2	328.045	60-92-4	6076	C00575	HMDB00058	1.3005	1.2425	1.7893	1.5792	1.2191	0.7737	0.9103	1.0082	1.6579	0.9918
3334	adenosine	Nucleotide	Purine Metabolism, Adenine containing	555	LC/MS Neg	798	2075.4	134.047	58-61-7	60961	C00212	HMDB00050	0.7967	0.7277	0.5917	0.7281	1.0113	1.0978	1.0503	1.2622	0.5524	1.1838
3335	adenine	Nucleotide	Purine Metabolism, Adenine containing	554	LC/MS Pos Early	880	2221	136.062	73-24-5	190	C00147	HMDB00034	0.6804	0.9658	2.0361	7.638	0.5297	0.9454	0.997	1.0637	33.5694	1.0278
3340	N1-methyladenosine	Nucleotide	Purine Metabolism, Adenine containing	15650	LC/MS Pos Early	1242	2120	282.12	15763-06-1	27476	C02494	HMDB03331	0.768	1.2243	0.9534	1.0991	0.7343	0.8533	1.0466	1.374	0.7658	1.0962
3350	N6-carbamoylthreonyladenosine	Nucleotide	Purine Metabolism, Adenine containing	35157	LC/MS Neg	100001415	2164	411.127	24719-82-2	161466		HMDB41623	1.0226	1.3863	1.0425	0.8662	0.6306	0.9696	0.9774	1.2569	0.9177	1.1162
3359	N6-succinyladenosine	Nucleotide	Purine Metabolism, Adenine containing	48130	LC/MS Neg	100001664	940	382.1	4542-23-8	165243		HMDB00912	0.4415	0.7571	1.0685	0.6982	0.4095	1.1853	0.8351	1	1.0264	0.7146
3370	7-methylguanine	Nucleotide	Purine Metabolism, Guanine containing	35114	LC/MS Pos Early	100001456	2175	166.072	578-76-7	11361	C02242	HMDB00897	0.8061	1.0412	1.024	0.9189	0.5347	0.8479	1.009	1.2639	0.8133	1.124
3376	N2,N2-dimethylguanosine	Nucleotide	Purine Metabolism, Guanine containing	35137	LC/MS Pos Early	100001412	2210	312.13	2140-67-2	92919		HMDB04824	1.3727	1.4245	0.9647	1.2965	0.7762	0.5729	0.7741	0.7301	1.4495	0.7028
3388	dihydroorotate	Nucleotide	Pyrimidine Metabolism, Orotate containing	601	LC/MS Polar	923	1910	157.025	155-54-4	648	C00337	HMDB03349	1.3772	1.9151	1.4635	1.2608	1.0053	1.1225	0.8777	0.6274	1.2101	0.5708
3389	orotate	Nucleotide	Pyrimidine Metabolism, Orotate containing	1505	LC/MS Polar	445	1638.1	155.01	50887-69-9	967	C00295	HMDB00226	1.2479	0.959	1.2858	1.0284	0.8419	1.0163	0.9611	1.0662	0.687	1.0217
3391	orotidine	Nucleotide	Pyrimidine Metabolism, Orotate containing	35172	LC/MS Polar	100001416	2250	287.052	314-50-1	92751		HMDB00788	0.9003	1.2971	1.231	1.2178	0.5583	0.7872	1.1429	1.011	0.9849	0.9005
3401	uridine	Nucleotide	Pyrimidine Metabolism, Uracil containing	606	LC/MS Neg	535	1457.6	243.062	58-96-8	6029	C00299	HMDB00296	1.0201	1.2853	4.8009	6.1756	0.9449	0.5177	0.7426	1.0008	9.8184	0.581
3402	uracil	Nucleotide	Pyrimidine Metabolism, Uracil containing	605	LC/MS Pos Early	825	827	113.035	66-22-8	1174	C00106	HMDB00300	1.145	1.1763	4.4579	5.0419	1.1651	0.6177	0.9099	0.9129	9.7334	0.4571
3403	pseudouridine	Nucleotide	Pyrimidine Metabolism, Uracil containing	33442	LC/MS Neg	821	1100	243.062	1445-07-4	15047	C02067	HMDB00767	1.0166	1.1946	0.9337	0.6853	1.011	1.1177	1.1712	1.221	0.629	1.1577
3404	5,6-dihydrouridine	Nucleotide	Pyrimidine Metabolism, Uracil containing	61833	LC/MS Neg	100001425	1119	245.078	5627-05-04	94312			0.8079	1.0834	0.7499	0.7146	0.8988	0.9322	1.0309	1.1847	0.9693	1.1139
3405	2'-O-methyluridine	Nucleotide	Pyrimidine Metabolism, Uracil containing	57655	LC/MS Neg	100010896	1831	257.078	2140-76-3	102212			1.0904	1.3343	1.6365	1.0149	0.7924	0.7636	0.8741	0.8621	2.356	1.0564
3406	5-methyluridine (ribothymidine)	Nucleotide	Pyrimidine Metabolism, Uracil containing	35136	LC/MS Neg	100001446	1778.1	257.078	1463-10-1	445408		HMDB00884	1.3602	1.8159	1.2955	1.1242	1.02	0.8727	0.9202	0.8619	2.093	0.791
3417	2'-deoxyuridine	Nucleotide	Pyrimidine Metabolism, Uracil containing	52602	LC/MS Neg	536	1586	227.067	951-78-0	13712	C00526	HMDB00012	1.2223	1.5102	0.696	0.7565	1.1451	1.3679	1.0663	0.9933	0.9764	0.9367
3420	3-ureidopropionate	Nucleotide	Pyrimidine Metabolism, Uracil containing	3155	LC/MS Pos Early	1053	875	133.061	462-88-4	111	C02642	HMDB00026	0.748	0.93	2.0462	2.1309	0.3274	0.5106	1.2543	0.9555	2.0926	0.6682
3422	N-acetyl-beta-alanine	Nucleotide	Pyrimidine Metabolism, Uracil containing	37432	LC/MS Neg	100002102	773	130.051	3025-95-4	76406	C01073		1.1584	1.0555	0.848	0.9776	0.7744	1.1682	1.1811	1.2045	0.8231	1.2401
3431	cytidine	Nucleotide	Pyrimidine Metabolism, Cytidine containing	514	LC/MS Pos Early	827	2124	244.093	65-46-3	6175	C00475	HMDB00089	0.6562	0.5115	1.9562	2.1765	1.3289	0.6579	0.6744	0.9897	2.5859	0.6533
3432	cytosine	Nucleotide	Pyrimidine Metabolism, Cytidine containing	573	LC/MS Pos Early	881	2060	112.051	71-30-7	597	C00380	HMDB00630	1.0091	1.3486	1.8155	2.3175	0.6022	0.2747	1.0095	0.4851	0.9754	0.592
3433	3-methylcytidine	Nucleotide	Pyrimidine Metabolism, Cytidine containing	35132	LC/MS Pos Early	100001466	2176	258.108	21028-20-6	159649			0.7982	1.6129	0.8574	0.8151	1.0013	0.5438	1.347	1.2248	0.8305	0.6221
3434	5-methylcytidine	Nucleotide	Pyrimidine Metabolism, Cytidine containing	22119	LC/MS Pos Early	100000763	2227	258.108	2140-61-6	92918		HMDB00982	0.8028	0.4614	0.843	1.0464	1.1599	1.4849	0.9536	1.279	0.7652	1.3307
3435	N4-acetylcytidine	Nucleotide	Pyrimidine Metabolism, Cytidine containing	35130	LC/MS Pos Early	100001413	1580	286.103	3768-18-1	107461		HMDB05923	1.2556	0.9025	1.0403	0.8253	0.9597	1.2141	1.3	1.805	0.9559	1.3934
3441	2'-deoxycytidine	Nucleotide	Pyrimidine Metabolism, Cytidine containing	15949	LC/MS Pos Early	100000125	2193	228.098	951-77-9	13711	C00881	HMDB00014	0.7184	0.7352	0.7066	1.0543	1.0016	1.1043	0.9984	1.1516	0.789	1.1002
3442	2'-O-methylcytidine	Nucleotide	Pyrimidine Metabolism, Cytidine containing	57554	LC/MS Pos Early	100010895	2411	258.108	2140-72-9	150971			1.1723	1.1451	1.0203	1.3525	0.7574	0.6457	0.9797	0.8854	1.3581	0.5732
3443	5-methyl-2'-deoxycytidine	Nucleotide	Pyrimidine Metabolism, Cytidine containing	38159	LC/MS Pos Early	100002300	2303	242.114	838-07-3	440055	C03592	HMDB02224	0.7014	0.84	0.664	0.9833	1.1291	1.4259	1.1662	1.3143	0.7595	1.1885
3451	thymidine	Nucleotide	Pyrimidine Metabolism, Thymine containing	2183	LC/MS Pos Early	872	1400	243.098	50-89-5	5789	C00214	HMDB00273	0.6876	1.7403	0.8185	1.0612	0.9875	1.6864	0.941	1.0098	1.4053	0.6789
3452	thymine	Nucleotide	Pyrimidine Metabolism, Thymine containing	604	LC/MS Neg	882	1654	125.036	65-71-4	1135	C00178	HMDB00262	1.2017	0.9943	0.546	1.2478	0.8852	1.0579	1.0085	0.8318	1.9056	0.546
3453	5,6-dihydrothymine	Nucleotide	Pyrimidine Metabolism, Thymine containing	1418	LC/MS Pos Early	158	1280	129.066	696-04-8	93556	C00906	HMDB00079	3.5685	0.639	0.9801	1.0028	0.4389	1.0983	0.7795	1.1005	1.4569	0.5143
3455	3-aminoisobutyrate	Nucleotide	Pyrimidine Metabolism, Thymine containing	1566	LC/MS Pos Early	1114	2190	104.071	10569-72-9;214139-20-5	64956	C05145	HMDB03911	1.0012	1.1991	1.1311	2.4888	1.0736	0.2359	1.0565	0.9988	2.2869	0.8622
440	gamma-glutamylglutamate	Peptide	Gamma-glutamyl Amino Acid	36738	LC/MS Pos Early	331	1775	277.103	1116-22-9	92865	C05282	HMDB11737	1.5554	0.755	1.3594	1.2845	1.1667	1.4654	1.2861	1.0499	0.7337	0.9765
441	gamma-glutamylglutamine	Peptide	Gamma-glutamyl Amino Acid	2730	LC/MS Pos Early	1140	1430	276.119	10148-81-9	150914	C05283	HMDB11738	1.3646	0.8177	1.1177	0.9043	1.0806	1.2082	1.3977	1.0115	0.9572	0.8699
442	gamma-glutamylglycine	Peptide	Gamma-glutamyl Amino Acid	33949	LC/MS Pos Early	100001294	1535	205.082	1948-29-4	165527		HMDB11667	1.2742	0.7761	0.9623	0.9067	1.2635	1.8326	1.2189	1.0891	1.0239	0.9038
443	gamma-glutamylhistidine	Peptide	Gamma-glutamyl Amino Acid	18245	LC/MS Pos Early	1235	2740	285.119	37460-15-4	7017195			1.0524	1.0665	1.0206	0.6966	0.8535	1.8115	1.2916	1.5086	0.7875	0.7749
444	gamma-glutamylisoleucine*	Peptide	Gamma-glutamyl Amino Acid	34456	LC/MS Pos Early	100001485	2940	261.144		14253342		HMDB11170	0.4511	0.8126	1.2734	1.1529	1.0295	1.7109	0.7189	1.2168	0.9705	0.9101
445	gamma-glutamylleucine	Peptide	Gamma-glutamyl Amino Acid	18369	LC/MS Pos Early	1268	2991	261.144	2566-39-4	151023		HMDB11171	0.658	0.8463	1.3642	1.1544	1.57	1.5621	0.718	1.3286	1.3094	0.9437
446	gamma-glutamyl-alpha-lysine	Peptide	Gamma-glutamyl Amino Acid	55015	LC/MS Pos Early	100010901	2784	276.155		65254			0.7954	0.8793	0.9453	1.0841	1.207	1.612	1.4253	1.3772	1.1056	0.9226
447	gamma-glutamyl-epsilon-lysine	Peptide	Gamma-glutamyl Amino Acid	33934	LC/MS Pos Early	100001262	2717	276.155	17105-15-6	7015685		HMDB03869	0.9604	0.7707	0.7668	1.1012	0.7299	1.4055	1.2176	1.874	1.0311	1.5409
448	gamma-glutamylmethionine	Peptide	Gamma-glutamyl Amino Acid	44872	LC/MS Pos Early	100001313	2640	279.101	17663-87-5	7009567		HMDB29155	1.226	0.9111	1.1159	1.2879	1.4137	1.1327	1.0538	0.9462	1.0617	0.7253
449	gamma-glutamylphenylalanine	Peptide	Gamma-glutamyl Amino Acid	33422	LC/MS Pos Early	100000491	2992	295.129	7432-24-8	111299		HMDB00594	1.1145	0.9555	1.1635	1.0099	1.3519	1.5375	0.6059	1.1341	0.9551	0.9901
450	gamma-glutamylthreonine	Peptide	Gamma-glutamyl Amino Acid	33364	LC/MS Pos Early	100001314	1750	249.108	5652-48-2	76078708		HMDB29159	0.7832	0.798	1.0328	0.9724	0.9106	2.0231	1.5057	1.433	0.8939	1.1617
451	gamma-glutamyltryptophan	Peptide	Gamma-glutamyl Amino Acid	33947	LC/MS Neg	100001295	1960	332.125	66471-20-3	3989307		HMDB29160	2.9191	1.1874	0.9043	0.8087	1.3174	1.1428	1.2786	0.7992	0.7401	0.9766
452	gamma-glutamyltyrosine	Peptide	Gamma-glutamyl Amino Acid	2734	LC/MS Pos Early	1102	2518	311.124	7432-23-7	94340		HMDB11741	1.8753	0.9964	0.9574	1.0036	1.3659	1.5339	1.0403	1.0041	0.9702	0.7542
453	gamma-glutamylvaline	Peptide	Gamma-glutamyl Amino Acid	43829	LC/MS Pos Early	100001126	2700	247.129	2746-34-1	7015683		HMDB11172	0.8307	0.8551	1.003	1.0677	0.997	1.546	1.1292	1.2631	1.1689	0.9907
455	gamma-glutamylcitrulline*	Peptide	Gamma-glutamyl Amino Acid	62104	LC/MS Pos Early	100020241	1644	305.146					1.166	1.0963	0.933	0.9382	0.9511	1.4448	0.9747	1.0949	0.8986	1.0747
607	glycylvaline	Peptide	Dipeptide	18357	LC/MS Pos Early	100000487	2734	175.108	1963-21-9	97417		HMDB28854	1.3731	1.4162	1.3185	1.807	0.8136	0.9491	0.7685	1.0614	1.186	0.514
718	prolylglycine	Peptide	Dipeptide	40703	LC/MS Pos Early	100003674	2136	173.092	2578-57-6	6426709		HMDB11178	1.5017	1.165	0.7076	0.7992	1.0448	1.0126	1.3151	1.1031	0.6161	0.9144
880	phenylacetylglycine	Peptide	Acetylated Peptides	33945	LC/MS Pos Early	100001275	2317	194.081	500-98-1	68144	C05598	HMDB00821	0.561	1.0748	1.0933	1.1669	0.4957	1.1287	0.9205	1.5884	0.6462	1.5029
3589	hippurate	Xenobiotics	Benzoate Metabolism	15753	LC/MS Neg	100000014	2106.9	178.051	495-69-2	464	C01586	HMDB00714	0.7227	0.9771	1.4588	1.5098	0.3318	0.5263	0.8325	1.569	1.2406	0.9358
3593	2-hydroxyhippurate (salicylurate)	Xenobiotics	Benzoate Metabolism	18281	LC/MS Neg	1869	2184	194.046	487-54-7	10253	C07588	HMDB00840	0.8881	2.8304	2.8569	2.8854	0.7497	0.5771	0.8219	1.0386	3.3374	0.5771
3595	4-hydroxyhippurate	Xenobiotics	Benzoate Metabolism	35527	LC/MS Neg	100001423	1475	194.046	2482-25-9	151012		HMDB13678	0.5971	1.0833	0.9816	0.6016	0.4445	1.1182	1.1146	1.1913	1.344	0.8493
3601	benzoate	Xenobiotics	Benzoate Metabolism	15778	LC/MS Neg	100000008	1750	121.029	65-85-0	243	C00180	HMDB01870	2.2968	1.0146	2.3637	3.7257	0.6783	0.4579	0.6371	1.6271	2.6096	0.7159
3619	catechol sulfate	Xenobiotics	Benzoate Metabolism	35320	LC/MS Neg	100001605	1906	188.986	4918-96-1	3083879		HMDB59724	1.0096	1.2252	1.023	1.0699	0.3873	0.8623	0.8751	0.8751	0.8076	1.0077
3621	guaiacol sulfate	Xenobiotics	Benzoate Metabolism	46111	LC/MS Neg	100004208	2344	203.002		22473		HMDB60013	2.7674	1.4676	0.9223	0.9697	0.3069	1.0147	1.2243	1.4727	0.5456	0.8024
3624	4-methylcatechol sulfate	Xenobiotics	Benzoate Metabolism	46146	LC/MS Neg	100004111	2665	203.002					1.7044	2.4293	0.699	0.9542	0.5416	0.7917	2.5114	1.8178	1.0458	0.5085
3634	4-ethylphenylsulfate	Xenobiotics	Benzoate Metabolism	36099	LC/MS Neg	100001756	3580	201.023	123-07-9		C13637		0.3281	0.2864	0.5536	1.0618	0.5627	1.5111	3.5824	1.6923	0.2333	0.9382
3635	4-vinylphenol sulfate	Xenobiotics	Benzoate Metabolism	36098	LC/MS Neg	100001755	3320	199.007	2628-17-3	6426766	C05627	HMDB04072	0.8009	1.0625	0.8119	0.8133	0.8821	1.178	1.2014	1.0764	0.8664	0.8713
3648	3-methoxycatechol sulfate (2)	Xenobiotics	Benzoate Metabolism	48752	LC/MS Neg	100006376	2200	218.997					1	1.2088	0.8311	1.5914	0.5175	0.5175	1.02	1.0355	0.9505	0.5175
3649	methyl-4-hydroxybenzoate sulfate	Xenobiotics	Benzoate Metabolism	48429	LC/MS Neg	100006116	2873	230.997					0.7772	0.8746	0.7729	0.7697	0.351	1.1085	1.1688	0.9987	0.6253	1.1048
3656	p-cresol sulfate	Xenobiotics	Benzoate Metabolism	36103	LC/MS Neg	100001315	2890	187.007	3233-57-7	4615423		HMDB11635	0.4682	0.5355	0.5517	0.654	1.0142	4.8769	8.3369	5.2577	0.2301	0.9858
3658	2-amino-p-cresol sulfate	Xenobiotics	Benzoate Metabolism	37180	LC/MS Neg	100001801	2320	202.018					0.2593	1.3198	1.0505	1.3812	0.2487	2.8222	1.6333	1.769	0.4704	1.2023
3663	o-cresol sulfate	Xenobiotics	Benzoate Metabolism	36845	LC/MS Neg	100001806	2796	187.007		11615528			0.6426	0.9771	1.2267	1.0595	0.4832	0.8983	0.911	1	0.9408	1.0149
3664	phenylpropionylglycine	Xenobiotics	Benzoate Metabolism	35434	LC/MS Neg	100001591	2945	206.082	56613-60-6	152323		HMDB00860	0.4615	3.1265	6.207	5.5437	0.6165	0.6036	1.5612	0.8425	5.5137	0.3613
3667	3-(3-hydroxyphenyl)propionate sulfate	Xenobiotics	Benzoate Metabolism	45415	LC/MS Neg	100005391	1294	245.013	86321-32-6	187488			1.2908	6.35	1.259	1.4649	0.704	0.7256	1.2335	0.9898	1.3191	0.758
3670	3-(3-hydroxyphenyl)propionate	Xenobiotics	Benzoate Metabolism	35635	LC/MS Neg	100001624	1980	165.056	621-54-5	91	C11457	HMDB00375	1.7832	3.0268	0.2458	0.8467	1.2566	0.2458	0.5402	0.2458	1.1533	0.2458
3671	3-(4-hydroxyphenyl)propionate	Xenobiotics	Benzoate Metabolism	39587	LC/MS Neg	100002914	1670	165.056	501-97-3	10394	C01744	HMDB02199	0.8357	1.6607	1.3907	0.9895	0.4406	0.5646	1.3664	0.5467	1.6132	0.6037
3672	3-phenylpropionate (hydrocinnamate)	Xenobiotics	Benzoate Metabolism	15749	LC/MS Neg	100000010	2860	149.061	501-52-0	107	C05629	HMDB00764	4.565	1.9488	7.698	9.7677	0.857	0.6119	0.9163	1.0297	5.0463	0.9703
3690	caffeic acid sulfate	Xenobiotics	Xanthine Metabolism	53254	LC/MS Polar	100009337	1307	258.992				HMDB41708	0.9735	0.4669	0.6494	1.5029	1.422	1.0419	2.6167	1.0265	0.4633	0.4159
3751	genistein	Xenobiotics	Food Component/Plant	32448	LC/MS Neg	100001221	3754	269.046	446-72-0	5280961	C06563	HMDB03217	1.9904	1.1059	1.0984	1.2725	0.5437	0.7224	1.0021	0.7538	1.532	0.4119
3752	genistein glucuronide*	Xenobiotics	Food Component/Plant	62063	LC/MS Neg	100020216	2895	445.078					2.3898	1.4737	2.1471	1.6613	0.6245	0.8279	0.9029	0.9598	1.3461	0.4709
3789	2,3-dihydroxyisovalerate	Xenobiotics	Food Component/Plant	38276	LC/MS Polar	100002417	1050	133.051	1756-18-9	677	C04039	HMDB12141	0.9005	0.7439	0.7057	0.6535	1.1042	2.5971	1.6311	1.1517	0.9814	1.4447
3793	2,8-quinolinediol sulfate	Xenobiotics	Food Component/Plant	48691	LC/MS Neg	100004321	2612	239.997					0.7785	0.9711	0.0241	0.0353	0.0241	1.0259	2.1335	1.6246	1.5341	0.9122
3796	2-isopropylmalate	Xenobiotics	Food Component/Plant	15667	LC/MS Polar	100000409	2605	175.061	3237-44-3	77	C02504	HMDB00402	0.5005	1.0106	0.8501	1.1475	0.9989	1.6954	1.2229	0.9507	2.9606	0.3724
3797	2-oxindole-3-acetate	Xenobiotics	Food Component/Plant	40479	LC/MS Neg	100003109	2076	190.051	2971-31-5	3080590		HMDB35514	0.6998	1.3237	2.9497	1.9694	0.4677	0.7584	1.1116	0.8642	1.2529	0.6683
3808	3-hydroxyindolin-2-one	Xenobiotics	Food Component/Plant	42561	LC/MS Pos Early	100003823	2035	132.044	61-71-2	6097	C11130		1.094	1.7567	0.7467	0.9724	0.3339	1.3436	1.5246	0.4864	1.8203	1.6921
3815	betonicine	Xenobiotics	Food Component/Plant	38100	LC/MS Pos Early	100002153	1012	160.097	515-25-3	164642	C08269	HMDB29412	1.1661	1.1935	0.9213	0.9957	1.0043	1.0995	0.9936	0.8678	1.0606	0.8952
3819	gluconate	Xenobiotics	Food Component/Plant	587	LC/MS Polar	338	2922	195.051	527-07-1	10690	C00257	HMDB00625	0.6555	0.975	1.423	1.2503	0.7068	1.1041	1.4727	0.8959	1.4509	0.875
3859	cinnamoylglycine	Xenobiotics	Food Component/Plant	38637	LC/MS Neg	100002253	3127	204.067	16534-24-0	709625		HMDB11621	0.5987	1.2885	1.5	1.9365	0.5635	0.7626	1.1399	1.3114	1.8974	0.7672
3876	daidzein	Xenobiotics	Food Component/Plant	32453	LC/MS Neg	100001219	3566	253.051	486-66-8	5281708	C10208	HMDB03312	1.6061	1.1877	1.3481	1.6923	0.6469	0.8155	1.0399	0.8985	1.5177	0.4109
3877	daidzein glucuronide*	Xenobiotics	Food Component/Plant	62070	LC/MS Neg	100020206	2580	429.083					1.6953	1.3866	1.6395	1.8186	0.5852	0.8137	0.9874	1.0126	1.2568	0.4505
3879	genistein sulfate*	Xenobiotics	Food Component/Plant	62061	LC/MS Neg	100020207	3616	349.002					3.6393	1.3216	1.1184	1.1244	0.6454	0.769	0.9366	0.6271	1.3829	0.5885
3883	dihydroferulic acid	Xenobiotics	Food Component/Plant	40481	LC/MS Neg	100003432	1928	195.066	1135-23-5	14340			2.0619	1.8168	1.2259	0.8966	0.9468	0.7215	1.1743	0.4687	1.3621	0.7795
3890	equol glucuronide	Xenobiotics	Food Component/Plant	41948	LC/MS Neg	100003895	3215	417.119					0.8147	1.5279	1.2106	1.0397	0.3654	0.6299	0.604	1.0162	1.0996	0.679
3891	equol sulfate	Xenobiotics	Food Component/Plant	40478	LC/MS Neg	100003429	3630	321.044					1.627	1.4678	1.0077	0.9311	1.0795	0.9062	0.8141	0.8801	1.702	0.8068
3892	ergothioneine	Xenobiotics	Food Component/Plant	37459	LC/MS Pos Early	100002154	850	230.096	58511-63-0	3032311	C05570	HMDB03045	0.9906	0.1971	0.9172	0.6702	1.1797	1.0094	0.6122	0.7919	2.0774	1.4795
3894	erythritol	Xenobiotics	Food Component/Plant	20699	LC/MS Polar	100000846	1491	167.056	149-32-6	222285	C00503	HMDB02994	0.8427	0.9993	1.0245	0.8338	0.7851	1.1508	1.3477	1.1244	1.0874	1.0007
3896	ferulate	Xenobiotics	Food Component/Plant	35630	LC/MS Neg	100001542	1755	193.051	537-98-4	445858	C01494	HMDB00954	2.2914	1.2054	0.7785	0.7028	1.4269	1	1.0118	0.5109	0.366	0.366
3897	ferulic acid 4-sulfate	Xenobiotics	Food Component/Plant	47114	LC/MS Neg	100005389	1200	273.007	86321-29-1	6305574		HMDB29200	1.5293	1.5179	1.767	1.4797	0.7143	0.6303	1.1805	0.8125	1.7648	0.5155
3918	homostachydrine*	Xenobiotics	Food Component/Plant	33009	LC/MS Pos Early	100001550	1750	158.118	1195-94-4	441447	C08283	HMDB33433	2.5566	0.998	1.1059	1.2363	1.4313	1.3905	0.9404	0.8907	1.2956	1.2168
3921	indoleacrylate	Xenobiotics	Food Component/Plant	22114	LC/MS Neg	100000800	2511	186.056	1204-06-4	15030923		HMDB00734	1.2537	1.1861	1.168	0.8872	0.3017	0.3108	1.1392	1.0776	0.9482	0.7385
3922	indolin-2-one	Xenobiotics	Food Component/Plant	43374	LC/MS Pos Early	100004318	2575	134.06	59-48-3	321710	C12312		2.3601	2.523	2.0309	2.4789	0.6862	0.7128	1.3238	2.2298	0.4625	0.716
3947	N-(2-furoyl)glycine	Xenobiotics	Food Component/Plant	31536	LC/MS Neg	100001086	1525	168.03	5657-19-2;5657-19-2	21863		HMDB00439	0.7661	1.0234	1.5758	1	0.5277	0.8885	1.195	1	0.4636	0.769
3953	N-glycolylneuraminate	Xenobiotics	Food Component/Plant	37123	LC/MS Polar	100001491	3327.5	324.094	1113-83-3	123802	C03410	HMDB00833	0.5304	0.7353	1.0033	0.747	0.6545	1.5914	0.9967	0.8861	0.8179	1.1782
3985	quinate	Xenobiotics	Food Component/Plant	18335	LC/MS Polar	100000442	2432.9	191.056	77-95-2	6508	C00296	HMDB03072	0.7276	0.782	1.0364	1.2253	0.5061	1.3624	1.4052	1.2033	0.6131	0.3479
4010	stachydrine	Xenobiotics	Food Component/Plant	34384	LC/MS Pos Early	100001296	1440	144.102	4136-37-2	115244	C10172	HMDB04827	1.2733	1.0842	0.9197	0.9693	1.0851	1.0935	1.2403	1.0307	1.118	0.8906
4033	4-allylphenol sulfate	Xenobiotics	Food Component/Plant	37181	LC/MS Neg	100001868	3805	213.023					2.0343	1.4832	0.7868	1.0795	0.4989	1.3524	0.8469	0.8804	1.3304	1.3716
4034	methyl glucopyranoside (alpha + beta)	Xenobiotics	Food Component/Plant	46144	LC/MS Neg	100005864	1070	193.072					1.0523	1.1515	0.945	0.7853	1.0161	0.8999	0.9043	1.0646	0.9271	1.0546
4062	pyrraline	Xenobiotics	Food Component/Plant	48428	LC/MS Neg	100001767	2304	253.119	74509-14-1	122228		HMDB33143	1.0025	1.0568	0.853	0.7396	0.7669	0.9975	1.149	1.0668	0.7148	0.7791
4064	daidzein sulfate (2)	Xenobiotics	Food Component/Plant	48728	LC/MS Neg	100006363	3330	333.008					3.6341	1.7385	1.158	1.3156	0.6223	0.7986	0.9754	0.7499	1.3457	0.5891
4067	benzyl alcohol glucuronide	Xenobiotics	Food Component/Plant	48781	LC/MS Neg	100006253	2222	283.082	5285-02-09	9795797			0.797	1.1927	1.022	1.0937	0.4419	0.8404	0.978	2.1573	1.7008	0.6032
4068	N-acetylpyrraline	Xenobiotics	Food Component/Plant	48438	LC/MS Neg	100006120	2545	295.13					1.3679	1.1284	0.783	0.7603	0.9539	1.0075	0.9968	0.7818	1.0032	0.6245
4069	daidzein sulfate (1)	Xenobiotics	Food Component/Plant	48727	LC/MS Neg	100006362	2843	333.007					5.8733	1.8299	1.7446	2.9894	0.5767	0.5978	1.0103	0.6471	4.3705	0.1891
4122	4-hydroxycinnamate	Xenobiotics	Food Component/Plant	36770	LC/MS Neg	100001675	1457	163.04	501-98-4	637542	C00811	HMDB02035	1.6042	0.8506	0.6096	1.0341	0.7804	1.543	1.1402	0.5257	0.5443	0.3276
4142	tartronate (hydroxymalonate)	Xenobiotics	Bacterial/Fungal	20693	LC/MS Neg	100000840	610	118.999	80-69-3	45	C02287	HMDB35227	0.7153	0.8445	1.1359	1.0475	0.6516	0.9765	0.9893	1.0329	1.1084	0.8996
4511	salicylate	Xenobiotics	Drug - Topical Agents	1515	LC/MS Polar	501	802	137.024	69-72-7	338	C00805	HMDB01895	1.3722	1.431	1.0274	1.471	0.9266	0.841	0.9688	1.0071	0.9223	0.9908
4515	hydroquinone sulfate	Xenobiotics	Drug - Topical Agents	35322	LC/MS Neg	100001604	1395	188.986	123-31-9	161220	C00530	HMDB02434	1.1707	1.1708	0.8446	0.9959	0.4632	1.066	1.1608	1.0955	0.5797	0.9968
4528	4-acetylphenol sulfate	Xenobiotics	Drug - Other	44620	LC/MS Neg	100000711	2375	215.002		4684006			0.6852	1.1892	1.1449	1.2602	0.1707	1.0158	1.1863	0.9008	0.8752	1.0353
4579	sulfate*	Xenobiotics	Chemical	46960	LC/MS Neg	100002528	616	96.9601	14808-79-8	1118	C00059	HMDB01448	0.8639	1.0449	0.8588	0.8489	0.8471	1.1409	1.2981	1.188	0.8084	0.9734
4582	O-sulfo-L-tyrosine	Xenobiotics	Chemical	45413	LC/MS Neg	100005384	990	260.023		514186			0.7434	1.1492	1.0319	0.9151	0.8694	1.0503	1.2465	1.2233	0.5726	0.9268
4586	ethyl glucuronide	Xenobiotics	Chemical	39603	LC/MS Neg	100002849	793	221.067	17685-04-0	152226		HMDB10325	1.001	0.8882	1.1881	1.0247	0.7096	0.7204	0.9292	1.0622	1.4562	1.2909
4598	3-acetylphenol sulfate	Xenobiotics	Chemical	48693	LC/MS Neg	100004326	2477	215.002					0.5976	1.8763	0.9334	0.6193	0.2816	1.4128	1.0825	1.0666	0.7125	1.4472
4600	2-aminophenol sulfate	Xenobiotics	Chemical	43266	LC/MS Neg	100004322	1677	188.002		181670		HMDB61116	1.0278	1.5421	0.9897	1.446	0.296	0.8783	0.9842	1.0103	0.8608	0.9642
4629	S-(3-hydroxypropyl)mercapturic acid (HPMA)	Xenobiotics	Chemical	44552	LC/MS Neg	100004568	1576	220.065	23127-40-4	3371179			0.6289	0.8187	1.0123	1.0824	0.6909	1.4885	1.5923	1.5226	0.9877	0.9659
4644	dimethyl sulfone	Xenobiotics	Chemical	43424	LC/MS Pos Early	100004284	832	95.0161	67-71-0	6213	C11142	HMDB04983	0.7379	0.9561	1.0128	1.2068	0.6035	0.7782	0.9872	0.8612	1.0184	0.9255
4646	ectoine	Xenobiotics	Chemical	35651	LC/MS Pos Early	100001635	1980	143.082	96702-03-3	126041	C06231		0.7571	0.8272	1.0855	1.0272	0.7809	1.0447	1.2171	1.1237	0.9269	1.0134
4647	EDTA	Xenobiotics	Chemical	22163	LC/MS Neg	100001002	643	291.083	60-00-4	6049	C00284	HMDB15109	0.9212	0.9265	0.9763	1.1255	1.1614	0.8603	0.9281	0.8548	1.1341	1.0752
4651	glycolate (hydroxyacetate)	Xenobiotics	Chemical	15737	LC/MS Polar	203	1790.4	159.011	79-14-1	757	C00160	HMDB00115	0.985	0.5924	0.7522	1.1587	0.6557	1.0083	0.9943	0.7337	0.5586	1.0545
4654	HEPES	Xenobiotics	Chemical	21248	LC/MS Neg	100000843	1022	237.091	7365-45-9	23831			2.1421	0.7005	1.1188	0.4913	0.08	0.5806	0.6466	0.8812	1.2765	2.953
4655	iminodiacetate (IDA)	Xenobiotics	Chemical	21025	LC/MS Pos Early	100000900	808	134.045	142-73-4	8897	C19911	HMDB11753	0.8649	0.8893	1.0332	1.1879	1.2228	0.8439	0.9854	0.8356	1.2423	0.9972
4674	benzoylcarnitine*	Xenobiotics	Chemical	43265	LC/MS Pos Early	100004555	3041	266.139	105450-08-6				0.6258	0.5857	2.2409	2.0663	0.5857	0.5857	0.8743	1	0.5857	0.8329
4675	perfluorooctanesulfonic acid (PFOS)	Xenobiotics	Chemical	57564	LC/MS Neg	100010955	5233	498.93	1763-23-1	74483	C18142	HMDB59586	0.4089	0.7874	1.0672	1.0137	0.9403	0.7335	1.2192	1.0561	2.7482	0.9427
4688	trizma acetate	Xenobiotics	Chemical	20710	LC/MS Pos Early	100000856	1884	122.081	6850-28-8	6503	C07182		1	1	1	1	1	1	1	1	1	1
4699	1,2,3-benzenetriol sulfate (2)	Xenobiotics	Chemical	48762	LC/MS Neg	100006374	1709	204.981					0.364	2.0346	2.1743	3.5525	0.138	0.352	0.5251	0.2247	7.3035	0.9899
4701	3-hydroxypyridine sulfate	Xenobiotics	Chemical	48448	LC/MS Neg	100006098	1595.5	173.987	1955-23-3				1.1889	1.2948	1.0564	0.971	0.4768	1.029	1.4535	1.3393	0.5618	1.291
4703	3-hydroxyindolin-2-one sulfate	Xenobiotics	Chemical	48419	LC/MS Neg	100006103	2082	227.997					1	1.4593	0.9267	0.8407	0.3744	1.1324	1.2078	2.3739	0.4114	1.1314
4712	6-hydroxyindole sulfate	Xenobiotics	Chemical	48698	LC/MS Neg	100006260	2498	212.002					1.2577	1.1798	0.7906	0.9889	0.4691	1.1855	1.0111	1.4982	0.541	1.1622
4716	thioproline	Xenobiotics	Chemical	53231	LC/MS Pos Early	100009232	1250	134.027	34592-47-4	93176			0.3785	0.3001	0.7196	0.7429	0.75	1.1487	1.5805	1.3992	5.2118	1.308
